# Supplementary material
Source: PubMed Central journal article supplement (PMC7111320)

## Supplementary data

Fused-ring structure of decahydroisoquinolin as a novel scaffold for SARS 3CL protease inhibitors

Yasuhiro Shimamoto<sup>a</sup>, Yasunao Hattori<sup>a</sup>, Kazuya Kobayashi<sup>a</sup>, Kenta Teruya<sup>b</sup>, Akira Sanjoh<sup>c</sup>, Atsushi Nakagawa<sup>d</sup>, Eiki Yamashita<sup>d</sup>, and Kenichi Akaji<sup>\*a</sup>

<sup>a</sup> Department of Medicinal Chemistry, Kyoto Pharmaceutical University, Yamashina-ku, Kyoto 607-8412, Japan

<sup>b</sup> Department of Chemistry, Graduate School of Medical Science, Kyoto Prefectural University of Medicine, Kita-ku, Kyoto 603-8334, Japan

<sup>c</sup> R&D Center, Protein Wave Co. Nara 631-0006, Japan

<sup>d</sup> Institute for Protein Research, Osaka University, Suita, Osaka 565-0871, Japan

- (1) Synthesis of (*E*)-ethyl 5-((4-bromobenzyl)oxy)pent-2-enoate, starting compound for the synthesis of **31**
- (2) Synthesis of **27** and **28**
- (3) Intermediates for the synthesis of **40**
- (4) Intermediates for the synthesis of **41**
- (5) Intermediates for the synthesis of **44** and **45**
- (6) Intermediates for the synthesis of **46** to **49**
- (7) Figure S-1: Separation of diastereomer mixture on a reversed-phase HPLC
- (8) Figure S-2: Separation of enantiomer on a chiral column
- (9) Figure S-3: Elution profiles of **38** and **42** on a reversed-phase HPLC
- (10) Figure S-4: Elution profiles of **39** and **43** on a reversed-phase HPLC
- (11) Figure S-5: HPLC profiles of **40**, **41**, and **44-49**
- (12) Figure S-6: IC<sub>50</sub> values of **41** (63 μM) obtained from sigmoidal curve
- (13) Figure S-7: Possible interactions at the *N*-substituent
- (14) NMR data of synthesized compounds
  - (a) Compounds included in the manuscript
  - (b) Compounds included in the supporting information

**(1) Synthesis of (*E*)-ethyl 5-((4-bromobenzyl)oxy)pent-2-enoate, starting compound for the synthesis of 31**

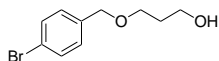

**3-[(4-bromobenzyl)oxy]propan-1-ol S1**

To a solution of NaH [60% in mineral oil (1.76 g, 44.0 mmol) in DMF (60 mL) 1,3-propanediol (3.06 g, 40.2 mmol) was added drop-wise at 0 °C. After being stirred for 30 min, *p*-bromobenzyl bromide (10.0 g, 40.0 mmol) was added drop-wise to the mixture at 0 °C. The resultant mixture was stirred for 16 h at room temperature. The reaction was quenched with saturated aqueous NH<sub>4</sub>Cl and the whole was extracted with AcOEt. The organic layer was washed with brine and dried over Na<sub>2</sub>SO<sub>4</sub>, filtered, and concentrated. The residue was purified by silica gel column chromatography (hexane/AcOEt = 3:1) to give **S1** (6.12 g, 62%) as a colorless oil. <sup>1</sup>H NMR (400 MHz): δ = 7.48-7.46 (m, 2H), 7.21-7.19 (m, 2H), 4.47 (s, 2H), 3.79 (t, *J* = 5.8 Hz, 2H), 3.65 (t, *J* = 5.8 Hz, 2H), 2.17 (brs, 1H), 1.87 (quint., *J* = 5.8 Hz, 2H); <sup>13</sup>C NMR (100 MHz): δ = 137.1, 131.6, 129.2, 121.6, 72.5, 69.4, 61.8, 32.1; HRMS (EI) Calcd. For C<sub>10</sub>H<sub>13</sub>BrO<sub>2</sub> [M]<sup>+</sup>: 244.0099. Found: 244.0094.

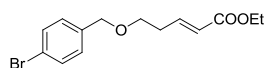

**(*E*)-ethyl 5-[(4-bromobenzyl)oxy]pent-2-enoate S2**

To a solution of PCC (16.1 g, 74.7 mmol) and celite (16.1 g) in CH<sub>2</sub>Cl<sub>2</sub> (300 mL) was added **S1** (6.12 g, 24.9 mmol). The temperature was gradually raised up to room temperature. After being stirred for 5 h at the same temperature, the reaction mixture was filtered through silica layer and the filtrate was concentrated. This compound was immediately used for the next step without purification. Triethylphosphonoacetate (5.5 mL, 27.4 mmol) was added to a suspension of NaH [60 % in mineral oil (1.20 g, 29.9 mmol)] in THF (30 mL) at 0 °C under an argon gas atmosphere and the mixture was stirred for 0.5 h. The crude product in THF (30 mL) was added to the resultant mixture at -20 °C. After being stirred for 1.5 h at -20 °C, the reaction was quenched with saturated aqueous NH<sub>4</sub>Cl, and the whole was extracted with AcOEt. The organic layer was washed with brine, dried over Na<sub>2</sub>SO<sub>4</sub>, filtered, and concentrated. The residue was purified by silica gel column chromatography (hexane/AcOEt = 20:1) to give **S2** (4.99 g, 64%, 2 steps) as a yellow pale oil. <sup>1</sup>H NMR (400 MHz): δ = 7.47 (d, *J* = 8.0 Hz, 2H), 7.20 (d, *J* = 8.0 Hz, 2H), 6.97 (td, *J* = 15.6, 6.8 Hz, 1H), 5.89 (d, *J* = 15.6 Hz, 1H), 4.47

(s, 2H), 4.19 (q,  $J = 7.2$  Hz, 2H), 3.58 (t,  $J = 6.6$  Hz, 2H), 2.51 (ddd,  $J = 13.2, 6.4, 1.2$  Hz, 2H), 1.29 (d,  $J = 7.2$  Hz, 3H);  $^{13}\text{C}$  NMR (100 MHz):  $\delta = 166.4, 145.3, 137.1, 131.5, 129.2, 123.0, 121.5, 72.3, 68.4, 60.2, 32.6, 14.3$ ; HRMS (EI) Calcd. For  $\text{C}_{14}\text{H}_{17}\text{BrO}_3$   $[\text{M}]^+$ : 312.0361. Found: 312.0365.

## (2) Synthesis of 27 and 28

Starting from 7, title compounds were synthesized according to the same route as the synthesis of 30 and 31.

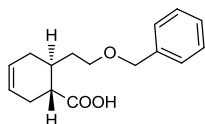

### (1R,6S)-6-[2-(benzyloxy)ethyl]cyclohex-3-ene-1-carboxylic acid 27

Colorless oil; yield 4.5% (50% max.):  $[\alpha]_D^{25} +52$  (*c* 0.83, CHCl<sub>3</sub>); <sup>1</sup>H NMR (400 MHz):  $\delta = 7.35-7.32$  (m, 4H), 7.29-7.23 (m, 1H), 5.67-5.61 (m, 2H) 4.49 (dd, *J* = 18.8, 12.0 Hz, 2H), 3.55-3.49 (m, 2H), 2.44-2.20 (m, 4H), 2.11-2.05 (m, 1H), 1.92-1.84 (m, 1H), 1.78-1.72 (m, 1H), 1.57-1.48 (m, 1H); <sup>13</sup>C NMR (100 MHz):  $\delta = 181.6, 138.1, 128.3, 127.6, 127.5, 125.6, 124.4, 72.8, 67.7, 45.0, 33.5, 31.9, 29.4, 27.6$ ; HRMS (EI) Calcd. For C<sub>16</sub>H<sub>20</sub>O<sub>3</sub> [M]<sup>+</sup>: 260.1413. Found: 260.1417.

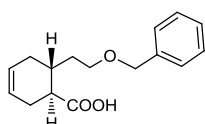

### (1S,6R)-6-[2-(benzyloxy)ethyl]cyclohex-3-ene-1-carboxylic acid 28

Colorless oil; yield 2.3% (50% max.):  $[\alpha]_D^{28} -54.5$  (*c* 0.155, CHCl<sub>3</sub>); <sup>1</sup>H NMR (400 MHz):  $\delta = 7.34-7.31$  (m, 4H), 7.30-7.27 (m, 1H), 5.68-5.62 (m, 2H) 4.50 (dd, *J* = 18.0, 12.0 Hz, 2H), 3.59-3.51 (m, 2H), 2.47-2.21 (m, 4H), 2.12-2.08 (m, 1H), 1.92-1.86 (m, 1H), 1.81-1.75 (m, 1H), 1.60-1.52 (m, 1H); <sup>13</sup>C NMR (100 MHz):  $\delta = 181.4, 138.2, 128.4, 127.7, 127.6, 125.7, 124.5, 72.9, 67.8, 45.0, 33.7, 32.1, 29.5, 27.7$ ; HRMS (EI) Calcd. For C<sub>16</sub>H<sub>20</sub>O<sub>3</sub> [M]<sup>+</sup>: 260.1410. Found: 260.1417.

### (3) Intermediates for the synthesis of 40

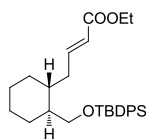

#### (E)-ethyl

#### 4-[(1R,2S)-2-[[*tert*-butyldiphenylsilyloxy]methyl]cyclohexyl]but-2-enoate S3

Colorless oil; yield 98% (2 steps):  $[\alpha]_D^{28} +11$  (*c* 0.60, CHCl<sub>3</sub>); <sup>1</sup>H NMR (400 MHz):  $\delta$  = 7.67-7.64 (m, 4H), 7.44-7.36 (m, 6H), 6.91 (ddd, *J* = 15.4, 8.6, 6.6 Hz, 1H), 5.72 (d, *J* = 15.6 Hz, 1H), 4.18 (q, *J* = 7.1 Hz, 2H), 3.61-3.60 (m, 2H), 2.33 (m, 1H), 1.97 (td, *J* = 14.3, 8.6 Hz, 1H), 1.80-1.69 (m, 4H), 1.54-1.49 (m, 1H), 1.35-1.18 (m, 4H), 1.29 (t, *J* = 7.2 Hz, 3H), 1.05 (s, 9H), 1.00-0.97 (m, 1H); <sup>13</sup>C NMR (100 MHz):  $\delta$  = 166.6, 148.2, 135.62, 135.61, 133.82, 133.80, 129.59, 129.55, 127.62, 127.59, 122.4, 66.2, 60.1, 43.9, 37.8, 36.4, 31.9, 30.0, 26.9, 26.1, 26.0, 19.3, 14.3; HRMS (FAB) Calcd. For C<sub>29</sub>H<sub>40</sub>NaO<sub>3</sub>Si [M+Na]<sup>+</sup>: 487.2644. Found: 487.2649.

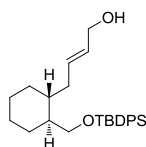

#### (E)-4-[(1R,2S)-2-[[*tert*-butyldiphenylsilyloxy]methyl]cyclohexyl]but-2-en-1-ol S4

Colorless oil; yield 98%:  $[\alpha]_D^{28} +8.3$  (*c* 0.23, CHCl<sub>3</sub>); <sup>1</sup>H NMR (400 MHz):  $\delta$  = 7.68-7.65 (m, 4H), 7.44-7.36 (m, 6H), 5.64-5.48 (m, 2H), 4.04 (d, *J* = 5.2 Hz, 2H), 3.66 (dd, *J* = 10.2, 3.2 Hz, 1H), 3.59 (dd, *J* = 10.2, 5.4 Hz, 1H), 2.22-2.18 (m, 1H), 1.87-1.79 (m, 2H), 1.72-1.69 (m, 3H), 1.37 (m, 1H), 1.30-1.18 (m, 4H), 1.05 (s, 9H), 1.00-0.95 (m, 1H); <sup>13</sup>C NMR (100 MHz):  $\delta$  = 135.64, 135.62, 134.0, 131.6, 130.2, 129.52, 129.50, 127.58, 127.55, 66.3, 63.8, 43.8, 38.1, 36.2, 31.7, 30.0, 26.9, 26.2, 26.1, 19.4; HRMS (FAB) Calcd. For C<sub>27</sub>H<sub>38</sub>NaO<sub>2</sub>Si [M+Na]<sup>+</sup>: 445.2539. Found: 445.2534.

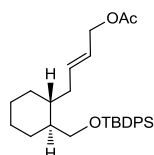

#### (E)-4-[(1R,2S)-2-[[*tert*-butyldiphenylsilyloxy]methyl]cyclohexyl]but-2-en-1-yl acetate 33

Colorless oil; yield 88%:  $[\alpha]_D^{27} +11$  (*c* 0.65, CHCl<sub>3</sub>); <sup>1</sup>H NMR (400 MHz):  $\delta$  =

7.67-7.64 (m, 4H), 7.44-7.36 (m, 6H), 5.71-5.64 (m, 1H), 5.48-5.42 (m, 1H), 4.47 (d,  $J = 6.4$  Hz, 2H), 3.65 (dd,  $J = 10.0, 2.8$  Hz, 1H), 3.57 (dd,  $J = 10.0, 5.2$  Hz, 1H), 2.23-2.19 (m, 1H), 2.05 (s, 3H), 1.88-1.79 (m, 2H), 1.71-1.68 (m, 3H), 1.40-1.38 (m, 1H), 1.30-1.18 (m, 4H), 1.05 (s, 9H), 1.00-0.94 (m, 1H);  $^{13}\text{C}$  NMR (100 MHz):  $\delta = 170.9, 135.63, 135.61, 134.8, 133.944, 133.935, 129.53, 129.51, 127.58, 127.56, 125.0, 66.3, 65.3, 43.8, 38.0, 36.3, 31.7, 30.0, 26.9, 26.2, 26.1, 21.0, 19.3$ ; HRMS (FAB) Calcd. For  $\text{C}_{29}\text{H}_{40}\text{NaO}_3\text{Si}$   $[\text{M}+\text{Na}]^+$ : 487.2644. Found: 487.2641.

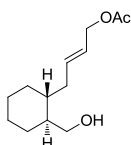

**(E)-4-[(1R,2S)-2-(hydroxymethyl)cyclohexyl]but-2-en-1-yl acetate S5**

Colorless oil; yield 92%:  $[\alpha]_{\text{D}}^{28} +20.2$  ( $c$  1.03,  $\text{CHCl}_3$ );  $^1\text{H}$  NMR (400 MHz):  $\delta = 5.76$  (ddd,  $J = 15.1, 8.1, 6.9$  Hz, 1H), 5.60-5.53 (m, 1H), 4.51 (d,  $J = 6.4$  Hz, 2H), 3.69 (dd,  $J = 10.6, 2.4$  Hz, 1H), 3.57 (dd,  $J = 10.6, 5.8$  Hz, 1H), 2.33-2.27 (m, 1H), 2.06 (s, 3H), 2.00-1.93 (m, 1H), 1.85-1.67 (m, 4H), 1.34-1.14 (m, 5H), 1.05-0.96 (m, 1H);  $^{13}\text{C}$  NMR (100 MHz):  $\delta = 170.9, 134.5, 125.3, 65.5, 65.2, 43.8, 38.0, 36.3, 31.7, 29.5, 26.0, 25.8, 21.0$ ; HRMS (FAB) Calcd. For  $\text{C}_{13}\text{H}_{22}\text{NaO}_3$   $[\text{M}+\text{Na}]^+$ : 249.1467. Found: 249.1469.

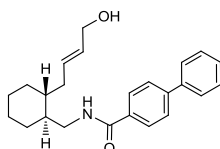

**N-((1S,2R)-2-[(E)-4-hydroxybut-2-en-1-yl]cyclohexyl)methyl)-[1,1'-biphenyl]-4-carboxamide 34**

Colorless oil; yield 53% (3 steps):  $[\alpha]_{\text{D}}^{28} +13$  ( $c$  0.41,  $\text{CHCl}_3$ );  $^1\text{H}$  NMR (400 MHz):  $\delta = 7.84-7.82$  (d,  $J = 8.4$  Hz, 2H), 7.66-7.64 (d,  $J = 8.0$  Hz, 2H), 7.62-7.60 (m, 2H), 7.48-7.45 (m, 2H), 7.41-7.37 (m, 1H), 6.24 (m, 1H), 5.79-5.64 (m, 2H), 4.11 (d,  $J = 4.4$  Hz, 2H), 3.79 (ddd,  $J = 13.5, 5.9, 3.7$  Hz, 1H), 3.21 (ddd,  $J = 13.6, 8.0, 5.8$  Hz, 1H), 2.31-2.27 (m, 1H), 2.19-2.12 (m, 1H), 1.88-1.84 (m, 1H), 1.75-1.72 (m, 3H), 1.52-1.44 (m, 1H), 1.32-1.05 (m, 5H);  $^{13}\text{C}$  NMR (100 MHz):  $\delta = 167.2, 144.2, 140.0, 133.3, 131.2, 130.5, 128.9, 128.0, 127.3, 127.24, 127.19, 63.8, 43.3, 41.1, 39.6, 36.5, 31.9, 30.6, 26.1, 25.7$ ; HRMS (EI) Calcd. For  $\text{C}_{24}\text{H}_{29}\text{NO}_2$   $[\text{M}]^+$ : 363.2198. Found: 363.2191.

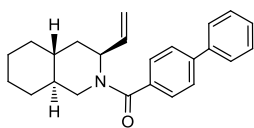

**(1,1'-biphenyl)-4-yl[(3*S*,4*aR*,8*aS*)-3-vinyloctahydroisoquinolin-2(1*H*)-yl]methanone**  
**36**

Colorless oil; yield 64%:  $[\alpha]_D^{28}$  -19 (*c* 0.87, CHCl<sub>3</sub>); <sup>1</sup>H NMR (400 MHz):  $\delta$  = 7.64-7.58 (m, 4H), 7.49-7.43 (m, 4H), 7.38-7.35 (m, 1H), 5.87 (ddd, *J* = 17.4, 10.6, 3.8 Hz, 0.4H), 5.78 (ddd, *J* = 17.4, 10.7, 3.6 Hz, 0.6H), 5.55 (brs, 0.4H), 5.31-5.28 (m, 1H), 5.23-5.16 (m, 1H), 4.53 (brs, 0.6H), 4.49 (dd, *J* = 13.2, 3.6 Hz, 0.6H), 3.49 (dd, *J* = 13.4, 3.8 Hz, 0.4H), 2.89-2.82 (m, 0.4H), 2.64-2.57 (m, 0.6H), 1.84-1.52 (m, 5H), 1.47-1.12 (m, 5.4H), 1.00-0.98 (m, 1H), 0.87-0.84 (m, 0.6H); <sup>13</sup>C NMR (100 MHz):  $\delta$  = 171.1, 170.4, 142.3, 142.2, 140.3, 137.1, 136.7, 135.4, 128.8, 127.68, 127.66, 127.4, 127.1, 126.8, 116.6, 116.1, 57.2, 50.8, 49.7, 43.5, 42.8, 41.9, 37.5, 36.8, 35.9, 32.9, 29.9, 29.7, 26.2, 26.1, 25.8, 25.7; HRMS (EI) Calcd. For C<sub>24</sub>H<sub>27</sub>NO [M]<sup>+</sup>: 345.2093. Found: 345.2091.

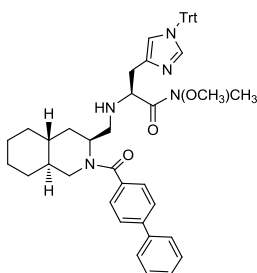

**(*S*)-2-(((3*S*,4*aR*,8*aS*)-2-[(1,1'-biphenyl)-4-carbonyl]decahydroisoquinolin-3-yl)methylamino)-*N*-methoxy-*N*-methyl-3-(1-trityl-1*H*-imidazol-4-yl)propanamide**  
**38**

Colorless oil; yield 50% (3 steps):  $[\alpha]_D^{29}$  -21 (*c* 0.49, CHCl<sub>3</sub>); <sup>1</sup>H NMR (400 MHz):  $\delta$  = 7.59-7.53 (m, 4H), 7.48-7.40 (m, 4H), 7.36-7.28 (m, 11H), 7.14-7.09 (m, 6H), 6.62 (brs, 0.6H), 6.56 (brs, 0.4H), 4.91 (m, 0.6H), 4.42 (dd, *J* = 13.6, 3.2 Hz, 0.4H), 4.13 (m, 0.4H), 3.93 (brs, 1H), 3.67 (s, 1.8H), 3.49 (s, 1.2H), 3.40 (dd, *J* = 13.0, 3.4 Hz, 0.6H), 3.14 (s, 1.8H), 3.08 (s, 1.2H), 2.87-2.83 (m, 2.4H), 2.72-2.66 (m, 2H), 2.49-2.43 (m, 0.6H), 1.80-1.70 (m, 3H), 1.61-1.55 (m, 1H), 1.39-1.26 (m, 6H), 1.05-0.83 (m, 2H); <sup>13</sup>C NMR (100 MHz):  $\delta$  = 175.5, 175.2, 171.3, 170.5, 142.5, 142.4, 141.88, 141.86, 140.44, 140.37, 138.2, 138.1, 137.7, 137.2, 135.9, 135.8, 129.73, 129.67, 129.3, 128.8, 128.7, 127.91, 127.87, 127.55, 127.47, 127.4, 127.2, 127.1, 127.05, 127.00, 119.2, 115.6, 77.2, 75.02, 75.01, 61.6, 61.5, 57.8, 57.5, 55.5, 49.5, 48.3, 47.1, 46.6, 43.1, 42.6, 42.1, 36.4, 36.2, 34.5, 33.0, 32.9, 32.6, 32.3, 32.0, 29.9, 29.7, 26.2, 26.1, 25.8, 25.7; HRMS (EI) Calcd. For C<sub>50</sub>H<sub>53</sub>N<sub>5</sub>O<sub>3</sub> [M]<sup>+</sup>: 771.4148. Found: 771.4154.

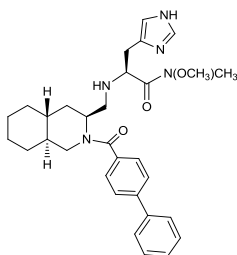

**(S)-2-([(3S,4aR,8aS)-2-[(1,1'-biphenyl)-4-carbonyl]decahydroisoquinolin-3-yl]methyl)amino)-3-(1H-imidazol-4-yl)-N-methoxy-N-methylpropanamide S6**

TFA/CH<sub>2</sub>Cl<sub>2</sub>/TIS/H<sub>2</sub>O (10:10:1.0:1.0, 11 mL) was added **38** (120 mg, 0.155 mmol). The mixture was stirred at room temperature for 4 h. The mixture was concentrated under reduced pressure. The residue was purified by silica gel column chromatography (CHCl<sub>3</sub>/MeOH = 10:1) to give a title compound (60.0 mg, 73%) as a colorless oil.  $[\alpha]_D^{28}$  -62 (*c* 0.085, CHCl<sub>3</sub>); <sup>1</sup>H NMR (400 MHz): δ = 7.68-7.36 (m, 10H), 6.84 (m, 0.6H), 6.82 (m, 0.4H), 5.03 (brs, 0.4H), 4.30-4.27 (m, 0.6H), 4.15-4.11 (m, 0.6H), 3.87-3.85 (m, 0.4H), 3.73 (s, 1.2H), 3.66 (s, 1.8H), 3.54-3.51 (m, 1H), 3.25 (s, 1.2H), 3.19 (s, 1.8H), 2.99-2.86 (m, 1H), 2.75-2.62 (m, 2H), 2.56-2.44 (m, 2H), 1.77-1.56 (m, 5H), 1.48-1.39 (m, 2H), 1.31-1.19 (m, 3H), 1.14-1.12 (m, 0.4H), 1.03-1.02 (m, 1H), 0.88-0.84 (m, 0.6H); <sup>13</sup>C NMR (100 MHz): δ = 174.4, 171.0, 143.0, 142.4, 140.2, 140.1, 135.7, 135.3, 135.2, 134.8, 128.84, 128.83, 128.2, 127.8, 127.7, 127.5, 127.19, 127.17, 127.14, 127.08, 77.2, 61.7, 59.8, 58.4, 55.7, 49.6, 49.4, 48.6, 48.1, 43.4, 42.6, 42.0, 36.6, 34.2, 34.0, 33.0, 32.9, 32.2, 30.0, 29.6, 26.2, 26.0, 25.8, 25.6; HRMS (EI) Calcd. For C<sub>31</sub>H<sub>39</sub>N<sub>5</sub>O<sub>3</sub> [M]<sup>+</sup>: 529.3053. Found: 529.3051.



#### (4) Intermediates for the synthesis of 41

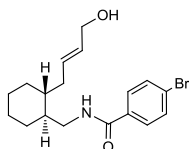

#### 4-bromo-*N*-((*1S,2R*)-2-[(*E*)-4-hydroxybut-2-en-1-yl]cyclohexyl)methyl)benzamide 35

Colorless oil; yield 55% (3 steps):  $[\alpha]_{\text{D}}^{27} +17$  (*c* 0.51,  $\text{CHCl}_3$ );  $^1\text{H}$  NMR (400 MHz):  $\delta = 7.63\text{--}7.61$  (m, 2H), 7.57–7.55 (m, 2H), 6.16 (brs, 1H), 5.77–5.66 (m, 2H), 4.10 (d,  $J = 4.4$  Hz, 2H), 3.76 (ddd,  $J = 13.6, 6.0, 3.6$  Hz, 1H), 3.16 (ddd,  $J = 13.8, 8.3, 6.0$  Hz, 1H), 2.29–2.25 (m, 1H), 2.17–2.11 (m, 1H), 2.02 (brs, 1H), 1.84–1.80 (m, 1H), 1.73–1.71 (m, 3H), 1.49–1.41 (m, 1H), 1.28–1.01 (m, 5H);  $^{13}\text{C}$  NMR (100 MHz):  $\delta = 166.5, 133.5, 131.8, 131.2, 130.4, 128.5, 126.1, 63.8, 43.3, 41.0, 39.6, 36.4, 31.9, 30.5, 26.0, 25.7$ ; HRMS (EI) Calcd. For  $\text{C}_{18}\text{H}_{24}\text{BrNO}_2$   $[\text{M}]^+$  365.0990. Found 365.0997.

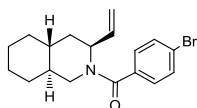

#### (4-bromophenyl)[(*3S,4aR,8aS*)-3-vinyloctahydroisoquinolin-2(*1H*)-yl]methanone 37

Colorless oil; yield 63%:  $[\alpha]_{\text{D}}^{28} -10$  (*c* 0.25,  $\text{CHCl}_3$ );  $^1\text{H}$  NMR (400 MHz):  $\delta = 7.55$  (d,  $J = 8.4$  Hz, 0.8H), 7.51 (d,  $J = 8.4$  Hz, 1.2H), 7.29–7.27 (m, 2H), 5.84 (ddd,  $J = 17.4, 10.6, 4.0$  Hz, 0.4H), 5.75 (ddd,  $J = 17.5, 10.9, 3.7$  Hz, 0.6H), 5.49 (brs, 0.4H), 5.29–5.26 (m, 1H), 5.19–5.11 (m, 1H), 4.44 (dd,  $J = 13.2, 4.0$  Hz, 0.6H), 4.38 (brs, 0.6H), 3.33 (dd,  $J = 13.2, 4.0$  Hz, 0.4H), 2.85–2.79 (m, 0.4H), 2.60–2.54 (m, 0.6H), 1.82–1.49 (m, 5H), 1.43–1.19 (m, 5H), 1.10–1.07 (m, 0.4H), 0.99–0.96 (m, 1H), 0.88–0.83 (m, 0.6H);  $^{13}\text{C}$  NMR (100 MHz):  $\delta = 170.2, 169.6, 136.9, 136.5, 135.4, 131.7, 131.6, 128.6, 128.0, 123.7, 123.6, 116.7, 116.2, 57.2, 50.8, 49.6, 43.5, 42.7, 41.8, 37.5, 36.7, 35.9, 32.8, 29.9, 29.6, 26.1, 26.0, 25.7, 25.6$ ; HRMS (EI) Calcd. For  $\text{C}_{18}\text{H}_{22}\text{BrNO}$   $[\text{M}]^+$ : 347.0885. Found: 347.0891.

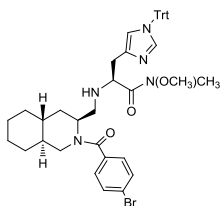

**(S)-2-((3S,4aR,8aS)-2-(4-bromobenzoyl)decahydroisoquinolin-3-yl)methylamino)-N-methoxy-N-methyl-3-(1-trityl-1H-imidazol-4-yl)propanamide 39**

Colorless oil; yield 58% (3 steps):  $[\alpha]_D^{28} -17$  (*c* 0.67, CHCl<sub>3</sub>); <sup>1</sup>H NMR (400 MHz):  $\delta = 7.47$  (d, *J* = 8.4 Hz, 1.2H), 7.44 (d, *J* = 8.4 Hz, 0.8H), 7.35-7.29 (m, 10.8H), 7.22 (d, *J* = 8.4 Hz, 1.2H), 7.14-7.11 (m, 6H), 6.60 (s, 0.6H), 6.55 (s, 0.4H), 4.87 (m, 0.6H), 4.37 (dd, *J* = 13.4, 3.8 Hz, 0.4H), 4.10 (brs, 0.6H), 3.90 (brs, 0.4H), 3.78 (brs, 0.6H), 3.64 (s, 1.8H), 3.51 (s, 1.2H), 3.24 (dd, *J* = 13.2, 3.6 Hz, 0.6H), 3.13 (s, 1.8H), 3.09 (s, 1.2H), 2.91-2.79 (m, 2.4H), 2.73-2.63 (m, 2H), 2.46-2.40 (m, 0.4H), 1.76-1.71 (m, 3.4H), 1.60-1.54 (m, 1.6H), 1.37-1.26 (m, 5H), 1.00-0.82 (m, 2H); <sup>13</sup>C NMR (100 MHz):  $\delta = 175.4, 175.1, 170.4, 169.6, 142.46, 142.41, 138.2, 138.1, 137.6, 137.2, 135.9, 135.8, 131.50, 131.46, 129.73, 129.70, 128.7, 128.4, 127.92, 127.89, 123.21, 123.18, 119.23, 119.22, 77.2, 75.0, 61.6, 61.5, 57.8, 57.5, 55.5, 49.4, 48.3, 47.1, 46.6, 43.1, 42.5, 42.0, 36.4, 36.2, 34.5, 33.0, 32.9, 32.7, 32.3, 32.0, 29.9, 29.7, 26.1, 26.0, 25.8, 25.6$ ; HRMS (EI) Calcd. For C<sub>44</sub>H<sub>48</sub>BrN<sub>5</sub>O<sub>3</sub> [M]<sup>+</sup>: 773.2941. Found: 773.2949.

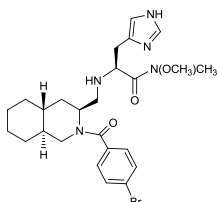

**(S)-2-((3S,4aR,8aS)-2-(4-bromobenzoyl)decahydroisoquinolin-3-yl)methylamino)-3-(1H-imidazol-4-yl)-N-methoxy-N-methylpropanamide S7**

Colorless oil; yield 74%:  $[\alpha]_D^{28} -36$  (*c* 0.28, CHCl<sub>3</sub>) <sup>1</sup>H NMR (400 MHz):  $\delta = 7.65$  (brs, 0.6H), 7.55-7.52 (m, 2H), 7.39 (m, 0.4H), 7.32 (d, *J* = 7.6 Hz, 1.2H), 7.18 (d, *J* = 8.4 Hz, 0.8H), 6.82 (s, 0.6H), 6.80 (s, 0.4H), 4.95 (brs, 0.4H), 4.25 (d, *J* = 12.0 Hz, 0.6H), 3.98 (brs, 0.6H), 3.86-3.80 (m, 0.4H), 3.71 (s, 1.2H), 3.65 (s, 1.8H), 3.54-3.53 (m, 0.6H), 3.35-3.27 (m, 0.4H), 3.23 (s, 1.2H), 3.20 (s, 1.8H), 2.99-2.82 (m, 2H), 2.71-2.60 (m, 2H), 2.51-2.42 (m, 2H), 1.76-1.58 (m, 4H), 1.47-1.24 (m, 6H), 1.05-0.83 (m, 2H); <sup>13</sup>C NMR (100 MHz):  $\delta = 174.2, 173.4, 170.1, 135.6, 135.4, 135.3, 134.7, 131.9, 131.7, 129.3, 128.3, 124.4, 123.6, 77.2, 61.7, 59.7, 58.2, 55.7, 49.5, 49.3, 48.5, 47.9, 43.4, 42.5, 41.9, 36.5, 34.2, 33.9, 32.9, 32.8, 32.2, 29.9, 29.6, 26.1, 25.9, 25.7, 25.5$ ; HRMS (EI) Calcd. For C<sub>25</sub>H<sub>34</sub>BrN<sub>5</sub>O<sub>3</sub> [M]<sup>+</sup>: 531.1845. Found: 531.1849.

## (5) Intermediates for the synthesis of 44 and 45

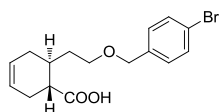

### (1R,6S)-6-{2-[(4-bromobenzyl)oxy]ethyl}cyclohex-3-enecarboxylic acid 30

Colorless oil; yield 20% (50% max):  $[\alpha]_D^{29} -33.2$  (*c* 1.16, CHCl<sub>3</sub>); <sup>1</sup>H NMR (400 MHz):  $\delta = 7.46$  (d, *J* = 8.0 Hz, 2H), 7.20 (d, *J* = 8.0 Hz, 2H), 5.66 (m, 2H), 4.44 (dd, *J* = 17.2, 12.0 Hz, 2H), 3.55-3.52 (m, 2H), 2.46-2.22 (m, 4H), 2.12-2.07 (m, 1H), 1.91-1.86 (m, 1H), 1.80-1.74 (m, 1H), 1.57-1.51 (m, 1H); <sup>13</sup>C NMR (100 MHz):  $\delta = 181.9, 137.3, 131.4, 129.2, 125.6, 124.4, 121.4, 72.1, 67.9, 45.0, 33.5, 31.9, 29.5, 27.7$ ; HRMS (EI) Calcd. For C<sub>16</sub>H<sub>19</sub>BrO<sub>3</sub> [M]<sup>+</sup>: 338.0518. Found: 338.0511.

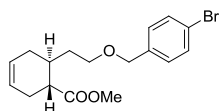

### (1R,6S)-methyl 6-{2-[(4-bromobenzyl)oxy]ethyl}cyclohex-3-enecarboxylate S8

Colorless oil; yield 20%:  $[\alpha]_D^{28} -40$  (*c* 0.78, CHCl<sub>3</sub>); <sup>1</sup>H NMR (400 MHz):  $\delta = 7.46$  (d, *J* = 8.0 Hz, 2H), 7.20 (d, *J* = 8.0 Hz, 2H), 5.67-5.61 (m, 2H), 4.43 (dd, *J* = 18.0, 12.0 Hz, 2H), 3.68 (s, 3H), 3.54-3.46 (m, 2H), 2.43-2.19 (m, 4H), 2.10-2.02 (m, 1H), 1.80-1.72 (m, 2H), 1.53-1.44 (m, 1H); <sup>13</sup>C NMR (100 MHz):  $\delta = 176.2, 137.5, 131.4, 129.2, 125.7, 124.7, 121.3, 72.1, 68.1, 51.5, 45.2, 33.8, 32.4, 29.9, 28.1$ ; HRMS (EI) Calcd. For C<sub>17</sub>H<sub>21</sub>BrO<sub>3</sub> [M]<sup>+</sup>: 352.0674. Found: 352.0681.

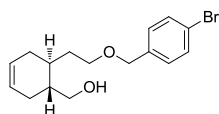

### [(1R,6S)-6-{2-[(4-bromobenzyl)oxy]ethyl}cyclohex-3-en-1-yl]methanol S9

Colorless oil; yield 73%:  $[\alpha]_D^{29} -20$  (*c* 0.80, CHCl<sub>3</sub>); <sup>1</sup>H NMR (400 MHz):  $\delta = 7.46$  (d, *J* = 8.4 Hz, 2H), 7.20 (d, *J* = 8.4 Hz, 2H), 5.65-5.58 (m, 2H), 4.45 (s, 2H), 3.68 (dd, *J* = 10.8, 6.0 Hz, 1H), 3.61 (dd, *J* = 10.8, 4.8 Hz, 1H), 3.58-3.47 (m, 2H), 2.15-2.09 (m, 2H), 2.00-1.76 (m, 4H), 1.66-1.62 (m, 1H), 1.57-1.50 (m, 1H); <sup>13</sup>C NMR (100 MHz):  $\delta = 137.3, 131.5, 129.3, 125.8, 125.5, 121.4, 72.3, 68.7, 65.0, 39.7, 32.9, 31.1, 29.5, 26.6$ ; HRMS (EI) Calcd. For C<sub>16</sub>H<sub>21</sub>BrO<sub>2</sub> [M]<sup>+</sup>: 324.0725. Found: 324.0723.

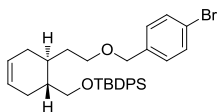

**(((1R,6S)-6-{2-[(4-bromobenzyl)oxy]ethyl}cyclohex-3-en-1-yl)methoxy)(tert-butyl)diphenylsilane S10**

Colorless oil; yield 88%:  $[\alpha]_D^{28} -19.5$  (*c* 1.15, CHCl<sub>3</sub>); <sup>1</sup>H NMR (400 MHz):  $\delta = 7.67-7.64$  (m, 4H), 7.45-7.34 (m, 8H), 7.18 (d, *J* = 8.0 Hz, 2H), 5.63-5.54 (m, 2H), 4.41 (dd, *J* = 15.2, 12.0 Hz, 2H), 3.68 (dd, *J* = 9.8, 5.4 Hz, 1H), 3.62 (dd, *J* = 10.0, 6.8 Hz, 1H), 3.53-3.44 (m, 2H), 2.16-1.96 (m, 3H), 1.88-1.80 (m, 2H), 1.73-1.68 (m, 2H), 1.50-1.44 (m, 1H), 1.05 (s, 9H); <sup>13</sup>C NMR (100 MHz):  $\delta = 137.7, 135.61, 135.60, 133.94, 133.92, 131.4, 129.5, 129.1, 127.6, 125.8, 125.3, 121.2, 72.1, 68.7, 65.9, 39.6, 32.9, 30.8, 29.0, 26.9, 26.7, 19.3$ ; HRMS (FAB) Calcd. For C<sub>32</sub>H<sub>40</sub>BrO<sub>5</sub> [M+H]<sup>+</sup>: 563.1981. Found: 563.1976.

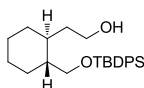

**2-[(1S,2R)-2-[[tert-butyl diphenylsilyl]oxy]methyl]cyclohexyl]ethanol S11**

Colorless oil; yield 84%:  $[\alpha]_D^{28} -9.4$  (*c* 1.1, CHCl<sub>3</sub>); <sup>1</sup>H NMR (400 MHz):  $\delta = 7.68-7.65$  (m, 4H), 7.45-7.36 (m, 6H), 3.68-3.54 (m, 4H), 1.78-1.66 (m, 5H), 1.37-1.18 (m, 6H), 1.06 (s, 9H), 1.02-0.97 (m, 1H); <sup>13</sup>C NMR (100 MHz):  $\delta = 135.68, 135.66, 133.91, 133.89, 129.55, 129.54, 127.60, 127.57, 66.6, 61.0, 44.5, 36.5, 35.5, 31.9, 30.0, 26.9, 26.1, 26.0, 19.3$ ; HRMS (FAB) Calcd. For C<sub>25</sub>H<sub>37</sub>O<sub>2</sub>Si [M+H]<sup>+</sup>: 397.2563. Found: 397.2560.

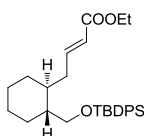

**(E)-ethyl**

**4-[(1S,2R)-2-[[tert-butyl diphenylsilyl]oxy]methyl]cyclohexyl]but-2-enoate S12**

Colorless oil; yield 98% (2 steps):  $[\alpha]_D^{28} -8.54$  (*c* 1.00, CHCl<sub>3</sub>); <sup>1</sup>H NMR (400 MHz):  $\delta = 7.67-7.64$  (m, 4H), 7.44-7.36 (m, 6H), 6.91 (ddd, *J* = 15.5, 8.7, 6.7 Hz, 1H), 5.72 (d, *J* = 15.6 Hz, 1H), 4.18 (q, *J* = 7.2 Hz, 2H), 3.64-3.58 (m, 2H), 2.38-2.32 (m, 1H), 2.00-1.93 (m, 1H), 1.79-1.69 (m, 4H), 1.54-1.49 (m, 1H), 1.35-1.18 (m, 4H), 1.28 (t, *J* = 7.0 Hz, 3H), 1.05 (s, 9H), 1.03-0.97 (m, 1H); <sup>13</sup>C NMR (100 MHz):  $\delta = 166.6, 148.2, 135.62, 135.61, 133.83, 133.80, 129.6, 129.5, 127.62, 127.59, 122.4, 66.3, 60.1, 43.9, 37.8, 36.4, 31.9, 30.0, 26.9, 26.1, 26.0, 19.3, 14.3$ ; HRMS (FAB) Calcd. For

$C_{29}H_{40}NaO_3Si$   $[M+Na]^+$ : 487.2644. Found: 487.2640.

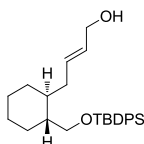

**(E)-4-[(1S,2R)-2-[[tert-butyl(diphenyl)silyloxy]methyl]cyclohexyl]but-2-en-1-ol S13**

Colorless oil; yield 94%:  $[\alpha]_D^{28}$  -14 (*c* 0.50,  $CHCl_3$ );  $^1H$  NMR (400 MHz):  $\delta$  = 7.68-7.65 (m, 4H), 7.44-7.36 (m, 6H), 5.64-5.48 (m, 2H), 4.04 (d, *J* = 5.2 Hz, 2H), 3.66 (dd, *J* = 10.0, 2.8 Hz, 1H), 3.58 (dd, *J* = 9.8, 5.4 Hz, 1H), 2.21-2.18 (m, 1H), 1.87-1.79 (m, 2H), 1.72-1.69 (m, 3H), 1.42-1.33 (m, 1H), 1.30-1.18 (m, 4H), 1.05 (s, 9H), 1.00-0.95 (m, 1H);  $^{13}C$  NMR (100 MHz):  $\delta$  = 135.66, 135.64, 134.0, 131.6, 130.2, 129.55, 129.52, 127.60, 127.58, 66.3, 63.8, 43.9, 38.1, 36.2, 31.7, 30.0, 26.9, 26.2, 26.1, 19.4; HRMS (FAB) Calcd. For  $C_{27}H_{38}NaO_2Si$   $[M+Na]^+$ : 445.2539. Found: 445.2534.

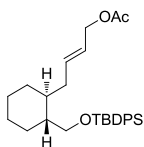

**(E)-4-[(1S,2R)-2-[[tert-butyl(diphenyl)silyloxy]methyl]cyclohexyl]but-2-en-1-yl acetate S14**

Colorless oil; yield 92%:  $[\alpha]_D^{28}$  -16.2 (*c* 1.38,  $CHCl_3$ );  $^1H$  NMR (400 MHz):  $\delta$  = 7.67-7.64 (m, 4H), 7.44-7.36 (m, 6H), 5.71-5.64 (m, 1H), 5.49-5.42 (m, 1H), 4.47 (d, *J* = 6.4 Hz, 2H), 3.65 (dd, *J* = 10.0, 3.2 Hz, 1H), 3.57 (dd, *J* = 10.0, 5.2 Hz, 1H), 2.23-2.19 (m, 1H), 2.05 (s, 3H), 1.88-1.79 (m, 2H), 1.71-1.68 (m, 3H), 1.40-1.38 (m, 1H), 1.30-1.18 (m, 4H), 1.05 (s, 9H), 1.00-0.94 (m, 1H);  $^{13}C$  NMR (100 MHz):  $\delta$  = 170.9, 135.63, 135.61, 134.8, 133.95, 133.94, 129.53, 129.51, 127.58, 127.56, 125.0, 66.3, 65.3, 43.8, 38.0, 36.3, 31.7, 30.0, 26.9, 26.2, 26.1, 21.0, 19.3; HRMS (FAB) Calcd. For  $C_{29}H_{40}NaO_3Si$   $[M+Na]^+$ : 487.2644. Found: 487.2644.

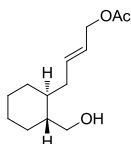

**(E)-4-[(1S,2R)-2-(hydroxymethyl)cyclohexyl]but-2-en-1-yl acetate S15**

Colorless oil; yield 88%:  $[\alpha]_D^{28}$  -26.5 (*c* 1.06,  $CHCl_3$ );  $^1H$  NMR (400 MHz):  $\delta$  =

5.80-5.72 (m, 1H), 5.60-5.53 (m, 1H), 4.51 (d,  $J = 6.4$  Hz, 2H), 3.69 (brd,  $J = 10.0$  Hz, 1H), 3.57 (dd,  $J = 10.2, 5.0$  Hz, 1H), 2.32-2.28 (m, 1H), 2.06 (s, 3H), 2.00-1.93 (m, 1H), 1.81-1.71 (m, 4H), 1.41 (brs, 1H), 1.33-1.29 (m, 1H), 1.25-1.14 (m, 4H), 1.05-0.96 (m, 1H);  $^{13}\text{C}$  NMR (100 MHz):  $\delta = 170.9, 134.5, 125.3, 65.5, 65.2, 43.8, 38.0, 36.3, 31.7, 29.5, 26.0, 25.8, 21.0$ ; HRMS (FAB) Calcd. For  $\text{C}_{13}\text{H}_{22}\text{NaO}_3$   $[\text{M}+\text{Na}]^+$ : 249.1467. Found: 249.1468.

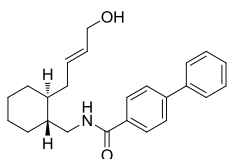

***N*-((**1R,2S**)-2-[(*E*)-4-hydroxybut-2-en-1-yl]cyclohexyl)methyl)-(1,1'-biphenyl)-4-carboxamide **S16****

Colorless oil; yield 50%:  $[\alpha]_D^{28} -9.1$  ( $c$  0.50,  $\text{CHCl}_3$ );  $^1\text{H}$  NMR (400 MHz):  $\delta = 7.84-7.82$  (m, 2H), 7.66-7.60 (m, 4H), 7.48-7.45 (m, 2H), 7.41-7.37 (m, 1H), 6.25 (m, 1H), 5.79-5.68 (m, 2H), 4.10 (d,  $J = 4.4$  Hz, 2H), 3.79 (ddd,  $J = 13.5, 6.2, 3.7$  Hz, 1H), 3.21 (ddd,  $J = 13.8, 8.2, 5.8$  Hz, 1H), 2.31-2.27 (m, 1H), 2.19-2.12 (m, 2H), 2.08 (brs, 1H), 1.88-1.84 (m, 1H), 1.75-1.72 (m, 3H), 1.52-1.43 (m, 1H), 1.32-1.21 (m, 3H), 1.19-1.04 (m, 1H);  $^{13}\text{C}$  NMR (100 MHz):  $\delta = 167.2, 144.2, 140.0, 133.3, 131.2, 130.5, 128.9, 128.0, 127.3, 127.24, 127.18, 63.8, 43.3, 41.1, 39.6, 36.5, 31.9, 30.6, 26.1, 25.7$ ; HRMS (EI) Calcd. For  $\text{C}_{24}\text{H}_{29}\text{NO}_2$   $[\text{M}]^+$ : 363.2198. Found: 363.2204.

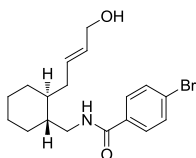

**4-bromo-*N*-((**1R,2S**)-2-[(*E*)-4-hydroxybut-2-en-1-yl]cyclohexyl)methylbenzamide **S17****

Colorless oil; yield 52%:  $[\alpha]_D^{28} -6.9$  ( $c$  0.38,  $\text{CHCl}_3$ );  $^1\text{H}$  NMR (400 MHz):  $\delta = 7.63-7.61$  (m, 2H), 7.59-7.55 (m, 2H), 6.15 (m, 1H), 5.78-5.66 (m, 2H), 4.10 (d,  $J = 4.4$  Hz, 2H), 3.76 (ddd,  $J = 13.5, 5.9, 3.9$  Hz, 1H), 3.16 (ddd,  $J = 13.7, 8.1, 5.9$  Hz, 1H), 2.29-2.25 (m, 1H), 2.17-2.11 (m, 2H), 1.84-1.80 (m, 1H), 1.73-1.71 (m, 3H), 1.60 (brs, 1H), 1.50-1.41 (m, 1H), 1.30-1.20 (m, 4H), 1.18-1.02 (m, 1H);  $^{13}\text{C}$  NMR (100 MHz):  $\delta = 166.5, 133.5, 131.8, 131.2, 130.4, 128.5, 126.1, 63.8, 43.3, 41.0, 39.6, 36.4, 31.9, 30.5, 26.0, 25.7$ ; HRMS (EI) Calcd. For  $\text{C}_{18}\text{H}_{24}\text{BrNO}_2$   $[\text{M}]^+$ : 365.0990. Found: 365.0987.

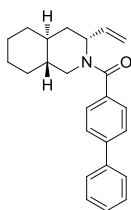

**(1,1'-biphenyl)-4-yl[(3R,4aS,8aR)-3-vinyloctahydroisoquinolin-2(1H)-yl]methanone S18**

Colorless oil; yield 58%:  $[\alpha]_D^{29} +29$  (*c* 0.80, CHCl<sub>3</sub>); <sup>1</sup>H NMR (400 MHz):  $\delta$  = 7.64-7.58 (m, 4H), 7.49-7.43 (m, 4H), 7.38-7.35 (m, 1H), 5.87 (ddd, *J* = 17.4, 10.6, 3.6 Hz, 0.4H), 5.78 (ddd, *J* = 17.5, 10.7, 3.5 Hz, 0.6H), 5.55 (brs, 0.4H), 5.31-5.28 (m, 1H), 5.23-5.16 (m, 1H), 4.54 (brs, 0.6H), 4.49 (dd, *J* = 13.2, 3.6 Hz, 0.6H), 3.49 (dd, *J* = 12.8, 3.6 Hz, 0.4H), 2.86 (dd, *J* = 13.2, 11.6 Hz, 0.4H), 2.61 (dd, *J* = 13.2, 11.6 Hz, 0.6H), 1.84-1.52 (m, 5H), 1.47-1.18 (m, 5H), 1.15-0.98 (m, 1.4H), 0.89-0.81 (m, 0.6H); <sup>13</sup>C NMR (100 MHz):  $\delta$  = 171.1, 170.4, 142.3, 142.2, 140.4, 137.1, 136.7, 135.4, 128.8, 127.7, 127.4, 127.1, 126.8, 116.6, 116.1, 57.2, 50.8, 49.7, 43.5, 42.8, 41.9, 37.5, 36.8, 35.9, 32.9, 29.9, 29.7, 26.2, 26.1, 25.8, 25.7; HRMS (EI) Calcd. For C<sub>24</sub>H<sub>27</sub>NO [M]<sup>+</sup>: 345.2093. Found: 345.2091.

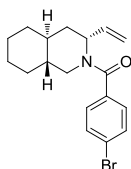

**(4-bromophenyl)[(3R,4aS,8aR)-3-vinyloctahydroisoquinolin-2(1H)-yl]methanone S19**

Colorless oil; yield 52%:  $[\alpha]_D^{28} +22$  (*c* 0.59, CHCl<sub>3</sub>); <sup>1</sup>H NMR (400 MHz):  $\delta$  = 7.56-7.50 (m, 2H), 7.29-7.27 (m, 2H), 5.84 (ddd, *J* = 17.3, 10.7, 3.9 Hz, 0.4H), 5.75 (ddd, *J* = 17.2, 10.8, 3.6 Hz, 0.6H), 5.49 (brs, 0.4H), 5.29-5.26 (m, 1H), 5.19-5.10 (m, 1H), 4.44 (dd, *J* = 13.2, 4.0 Hz, 0.6H), 4.38 (brs, 0.6H), 3.33 (dd, *J* = 13.2, 3.6 Hz, 0.4H), 2.82 (dd, *J* = 13.0, 11.4 Hz, 0.4H), 2.57 (dd, *J* = 13.0, 11.4 Hz, 0.6H), 1.82-1.49 (m, 5H), 1.43-1.15 (m, 5H), 1.13-1.04 (m, 0.4H), 1.02-0.90 (m, 1H), 0.89-0.79 (m, 0.6H); <sup>13</sup>C NMR (100 MHz):  $\delta$  = 170.2, 169.6, 136.9, 136.5, 135.4, 131.7, 131.6, 128.6, 128.0, 123.7, 123.6, 116.6, 116.2, 57.2, 50.8, 49.6, 43.5, 42.7, 41.8, 37.4, 36.7, 35.9, 32.8, 29.9, 29.7, 26.1, 26.0, 25.7, 25.6; HRMS (EI) Calcd. For C<sub>18</sub>H<sub>22</sub>BrNO [M]<sup>+</sup>: 347.0885. Found: 347.0891.

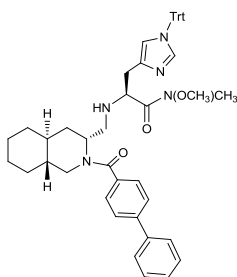

**(S)-2-([(3R,4aS,8aR)-2-[(1,1'-biphenyl)-4-carbonyl]decahydroisoquinolin-3-yl)methyl]amino)-N-methoxy-N-methyl-3-(1-trityl-1H-imidazol-4-yl)propanamide 42**

Colorless oil; yield 66%:  $[\alpha]_D^{28} +58$  (*c* 1.2, CHCl<sub>3</sub>); <sup>1</sup>H NMR (400 MHz):  $\delta = 7.58-7.24$  (m, 19H), 7.13-7.07 (m, 6H), 6.57 (brs, 0.4H), 6.55 (m, 0.6H), 5.00-4.98 (m, 0.4H), 4.46 (dd, *J* = 13.2, 3.6 Hz, 0.6H), 4.13-4.11 (m, 0.4H), 3.94 (m, 1H), 3.65 (s, 1.2H), 3.62-3.58 (m, 0.6H), 3.50 (s, 1.8H), 3.44 (dd, *J* = 13.6, 3.2 Hz, 0.4H), 3.14 (s, 1.2H), 3.11 (s, 1.8H), 3.01-2.93 (m, 1H), 2.88-2.77 (m, 2H), 2.65 (dd, *J* = 12.0, 6.4 Hz, 0.4H), 2.55-2.43 (m, 1.2H), 1.71-1.69 (m, 3H), 1.60-1.52 (m, 2H), 1.45-1.19 (m, 5H), 1.05-0.83 (m, 2H); <sup>13</sup>C NMR (100 MHz):  $\delta = 175.7, 175.4, 171.1, 170.8, 142.5, 142.4, 142.0, 141.9, 140.5, 140.3, 138.2, 138.1, 137.5, 137.4, 135.7, 129.8, 129.7, 128.8, 128.7, 127.9, 127.54, 127.47, 127.12, 127.11, 127.08, 127.00, 119.5, 119.3, 77.2, 75.1, 62.0, 61.6, 57.7, 57.6, 55.5, 49.3, 48.4, 47.5, 47.3, 43.0, 42.9, 42.1, 36.7, 36.6, 34.6, 33.5, 33.1, 33.0, 32.3, 32.1, 29.9, 29.73, 29.67, 26.2, 26.1, 25.9, 25.7$ ; HRMS (EI) Calcd. For C<sub>50</sub>H<sub>53</sub>N<sub>5</sub>O<sub>3</sub> [M]<sup>+</sup>: 771.4148. Found: 771.4154.

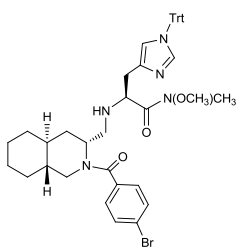

**(S)-2-([(3R,4aS,8aR)-2-(4-bromobenzoyl)decahydroisoquinolin-3-yl)methyl]amino)-N-methoxy-N-methyl-3-(1-trityl-1H-imidazol-4-yl)propanamide 43**

Colorless oil; yield 66%:  $[\alpha]_D^{28} +8.1$  (*c* 0.25, CHCl<sub>3</sub>); <sup>1</sup>H NMR (400 MHz):  $\delta = 7.47-7.31$  (m, 14H), 7.12-7.11 (m, 6H), 6.55 (brs, 1H), 4.94 (m, 0.4H), 4.40 (dd, *J* = 13.4, 3.4 Hz, 0.6H), 4.10 (brs, 0.4H), 3.91 (brs, 0.6H), 3.80 (m, 0.6H), 3.63 (s, 1.8H), 3.54 (s, 1.6H), 3.27 (dd, *J* = 13.0, 3.4 Hz, 0.4H), 3.12 (s, 1.8H), 3.11 (s, 1.2H), 2.98-2.91 (m, 1H), 2.86-2.73 (m, 2.6H), 2.61 (dd, *J* = 11.6, 6.0 Hz, 0.6H), 2.47-2.41 (m, 1.4H), 1.68-1.66 (m, 3H), 1.59-1.47 (m, 2H), 1.38-1.18 (m, 5H), 0.99-0.88 (m, 2H); <sup>13</sup>C NMR (100 MHz):  $\delta = 175.6, 175.3, 170.3, 170.0, 142.5, 142.4, 138.2, 138.1, 137.4,$



137.3, 135.8, 135.7, 131.50, 131.49, 129.8, 129.7, 128.9, 128.7, 127.9, 123.33, 123.28, 119.5, 119.3, 77.2, 75.1, 75.0, 61.6, 57.8, 57.5, 55.5, 49.2, 48.5, 47.4, 47.2, 42.9, 42.8, 42.0, 36.7, 36.5, 34.7, 33.5, 33.0, 32.9, 32.3, 32.1, 29.9, 29.7, 26.2, 26.0, 25.8, 25.7; HRMS (EI) Calcd. For  $C_{44}H_{48}BrN_5O_3$   $[M]^+$ : 773.2941. Found: 771.2935.

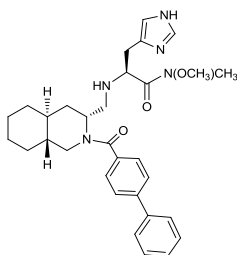

**(S)-2-([(3R,4aS,8aR)-2-[(1,1'-biphenyl)-4-carbonyl]decahydroisoquinolin-3-yl)methyl]amino)-3-(1H-imidazol-4-yl)-N-methoxy-N-methylpropanamide S20**

Colorless oil; yield 84%:  $[\alpha]_D^{28}$   $-30.7$  ( $c$  1.25,  $CHCl_3$ );  $^1H$  NMR (400 MHz):  $\delta$  = 7.65-7.60 (m, 4H), 7.55 (s, 1H), 7.49-7.44 (m, 4H), 7.40-7.36 (m, 1H), 6.79 (s, 1H), 5.23-5.21 (m, 0.75H), 4.53-4.51 (m, 0.25H), 4.13 (m, 0.25H), 3.90-3.88 (m, 0.75H), 3.67 (s, 2.25H), 3.67-3.65 (m, 0.75H), 3.57 (s, 0.75H), 3.57-3.53 (m, 0.75H), 3.28-3.26 (m, 0.25H), 3.26 (s, 2.25H), 3.22 (s, 0.75H), 3.12-3.06 (m, 0.25H), 2.97 (dd,  $J$  = 15.4, 3.4 Hz, 0.75H), 2.86 (dd,  $J$  = 13.4, 11.8 Hz, 0.75H), 2.62-2.53 (m, 1.5H), 2.36 (dd,  $J$  = 12.4, 4.4 Hz, 1H), 1.73 (m, 2H), 1.62-1.41 (m, 4H), 1.30-1.22 (m, 4H), 1.15-1.12 (m, 0.75H), 0.97-0.88 (m, 1.25H);  $^{13}C$  NMR (100 MHz):  $\delta$  = 175.0, 171.6, 171.0, 142.5, 140.2, 135.6, 135.4, 135.2, 134.4, 129.0, 128.9, 127.7, 127.4, 127.3, 127.2, 127.1, 127.0, 77.2, 61.7, 58.6, 55.5, 49.5, 49.1, 47.5, 42.8, 42.3, 37.0, 36.8, 35.2, 34.3, 33.1, 33.0, 32.3, 29.9, 29.7, 29.6, 29.2, 26.2, 26.0, 25.8, 25.6; HRMS (EI) Calcd. For  $C_{31}H_{39}N_5O_3$   $[M]^+$ : 529.3053. Found: 529.3061.

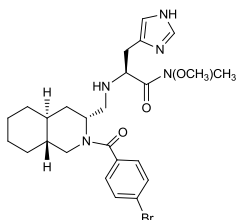

**(S)-2-([(3R,4aS,8aR)-2-(4-bromobenzoyl)decahydroisoquinolin-3-yl)methyl]amino)-3-(1H-imidazol-4-yl)-N-methoxy-N-methylpropanamide S21**

Colorless oil; yield 85%:  $[\alpha]_D^{28}$   $-26$  ( $c$  0.36,  $CHCl_3$ );  $^1H$  NMR (400 MHz):  $\delta$  = 7.56-7.47 (m, 3H), 7.31-7.28 (m, 2H), 6.78 (s, 0.25H), 6.77 (s, 0.75H), 5.16-5.13 (m, 0.75H), 4.44 (dd,  $J$  = 13.4, 3.8 Hz, 0.25H), 3.89-3.87 (m, 1H), 3.66 (s, 2.25H), 3.58 (s,

0.75H), 3.38 (dd,  $J = 13.6, 3.6$  Hz, 0.75H), 3.24 (s, 2.25H), 3.20 (s, 0.75H), 3.18-3.15 (m, 0.75H), 3.03 (dd,  $J = 11.6, 9.6$  Hz, 0.25H), 2.98-2.88 (m, 1H), 2.82 (dd,  $J = 13.4, 11.8$  Hz, 0.75H), 2.70-2.48 (m, 1.5H), 2.38 (dd,  $J = 12.2, 4.6$  Hz, 0.75H), 2.31 (dd,  $J = 11.8, 5.4$  Hz, 0.25H), 1.72-1.67 (m, 2H), 1.60-1.37 (m, 5H), 1.30-1.21 (m, 5H), 1.11-1.05 (m, 0.75H), 0.97-0.83 (m, 1.25H);  $^{13}\text{C}$  NMR (100 MHz):  $\delta = 174.8, 170.6, 170.2, 135.6, 135.3, 135.2, 134.6, 131.7, 131.6, 128.8, 128.4, 123.7, 123.4, 77.2, 61.7, 58.4, 57.9, 55.4, 49.4, 49.1, 47.5, 47.3, 42.8, 42.7, 42.1, 36.8, 36.7, 35.0, 34.2, 33.0, 32.9, 32.3, 29.8, 29.5, 29.3, 26.1, 25.9, 25.8, 25.5$ ; HRMS (EI) Calcd. For  $\text{C}_{25}\text{H}_{34}\text{BrN}_5\text{O}_3$   $[\text{M}]^+$ : 531.1845. Found: 531.1837.

## (6) Intermediates for the synthesis of 46 to 49

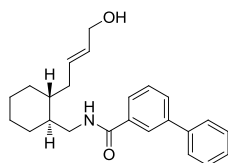

### *N*-((*1S,2R*)-2-[(*E*)-4-hydroxybut-2-en-1-yl]cyclohexyl)methyl-(*1,1'*-biphenyl)-3-carboxamide S22

Colorless oil; yield 45%;  $[\alpha]_D^{21} +7.7$  (*c* 0.60, CHCl<sub>3</sub>); <sup>1</sup>H NMR (400 MHz):  $\delta = 7.98$ - $7.97$  (m, 1H),  $7.73$ - $7.69$  (m, 2H),  $7.64$ - $7.58$  (m, 2H),  $7.52$ - $7.43$  (m, 3H),  $7.40$ - $7.35$  (m, 1H),  $6.25$  (m, 1H),  $5.79$ - $5.67$  (m, 2H),  $4.10$  (d, *J* = 4.4 Hz, 2H),  $3.80$  (ddd, *J* = 13.6, 6.0, 3.6 Hz, 1H),  $3.20$  (ddd, *J* = 13.7, 8.1, 5.9 Hz, 1H),  $2.31$ - $2.27$  (m, 1H),  $2.19$ - $2.12$  (m, 1H),  $2.02$  (brs, 1H),  $1.87$ - $1.83$  (m, 1H),  $1.71$  (m, 3H),  $1.58$ - $1.43$  (m, 1H),  $1.30$ - $1.01$  (m, 5H); <sup>13</sup>C NMR (100 MHz):  $\delta = 167.5$ , 141.8, 140.2, 135.3, 131.2, 130.5, 130.1, 129.0, 128.9, 127.8, 127.2, 125.8, 125.4, 63.8, 43.3, 41.1, 39.6, 36.5, 31.9, 30.6, 26.0, 25.7; HRMS (EI) Calcd. For C<sub>24</sub>H<sub>29</sub>NO<sub>2</sub> [M]<sup>+</sup>: 363.2198. Found: 363.2193.

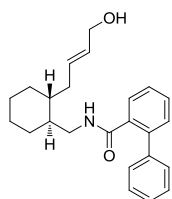

### *N*-((*1S,2R*)-2-[(*E*)-4-hydroxybut-2-en-1-yl]cyclohexyl)methyl-(*1,1'*-biphenyl)-2-carboxamide S23

Colorless oil; yield 55%;  $[\alpha]_D^{28} +19.4$  (*c* 1.58, CHCl<sub>3</sub>); <sup>1</sup>H NMR (400 MHz):  $\delta = 7.72$  (dd, *J* = 7.4, 1.4 Hz, 1H),  $7.49$ - $7.35$  (m, 7H),  $7.33$  (dd, *J* = 7.4, 1.0 Hz, 1H),  $5.68$ - $5.53$  (m, 2H),  $5.29$  (m, 1H),  $4.06$  (d, *J* = 5.6 Hz, 2H),  $3.46$  (ddd, *J* = 13.6, 6.0, 3.2 Hz, 1H),  $2.88$  (ddd, *J* = 13.5, 7.6, 5.7 Hz, 1H),  $2.11$ - $2.06$  (m, 2H),  $1.95$ - $1.88$  (m, 2H),  $1.61$ - $1.58$  (m, 1H),  $1.51$ - $1.48$  (m, 1H),  $1.10$ - $0.91$  (m, 5H),  $0.57$ - $0.48$  (m, 1H); <sup>13</sup>C NMR (100 MHz):  $\delta = 169.4$ , 140.4, 139.3, 135.7, 131.0, 130.4, 130.3, 130.0, 128.9, 128.74, 128.72, 127.7, 127.6, 63.7, 43.0, 40.6, 38.8, 36.3, 31.7, 30.0, 25.8, 25.7; HRMS (EI) Calcd. For C<sub>24</sub>H<sub>29</sub>NO<sub>2</sub> [M]<sup>+</sup>: 363.2198. Found: 363.2193.

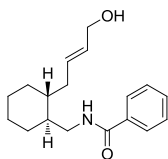

***N*-((**1S,2R**)-2-[(*E*)-4-hydroxybut-2-en-1-yl]cyclohexyl)methylbenzamide **S24****

Colorless oil; yield 56%:  $[\alpha]_{\text{D}}^{28} +17$  (*c* 0.60,  $\text{CHCl}_3$ );  $^1\text{H}$  NMR (400 MHz):  $\delta = 7.76\text{--}7.74$  (m, 2H), 7.52–7.48 (m, 1H), 7.45–7.41 (m, 2H), 6.19 (brs, 1H), 5.78–5.66 (m, 2H), 4.10 (d,  $J = 4.4$  Hz, 2H), 3.77 (ddd,  $J = 13.5, 5.9, 3.7$  Hz, 1H), 3.19 (ddd,  $J = 13.7, 8.1, 5.9$  Hz, 1H), 2.32–2.26 (m, 1H), 2.18–2.11 (m, 1H), 1.85–1.82 (m, 1H), 1.73–1.71 (m, 3H), 1.51–1.41 (m, 1H), 1.32–1.03 (m, 6H);  $^{13}\text{C}$  NMR (100 MHz):  $\delta = 167.5, 134.7, 131.4, 131.2, 130.5, 128.6, 126.8, 63.8, 43.2, 41.1, 39.6, 36.5, 31.9, 30.6, 26.0, 25.7$ ; HRMS (EI) Calcd. For  $\text{C}_{18}\text{H}_{25}\text{NO}_2$   $[\text{M}]^+$ : 287.1885. Found: 287.1889.

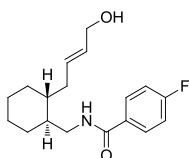

**4-fluoro-*N*-((**1S,2R**)-2-[(*E*)-4-hydroxybut-2-en-1-yl]cyclohexyl)methylbenzamide **S25****

Colorless oil; yield 54%:  $[\alpha]_{\text{D}}^{28} +15.6$  (*c* 1.00,  $\text{CHCl}_3$ );  $^1\text{H}$  NMR (400 MHz):  $\delta = 7.78\text{--}7.75$  (m, 2H), 7.12–7.08 (m, 2H), 6.25 (brs, 1H), 5.77–5.65 (m, 2H), 4.09 (d,  $J = 4.4$  Hz, 2H), 3.75 (ddd,  $J = 13.4, 5.8, 3.8$  Hz, 1H), 3.16 (ddd,  $J = 13.7, 8.1, 5.9$  Hz, 1H), 2.29–2.24 (m, 1H), 2.17–2.10 (m, 1H), 1.84–1.71 (m, 4H), 1.49–1.41 (m, 1H), 1.28–1.05 (m, 5H);  $^{13}\text{C}$  NMR (100 MHz):  $\delta = 166.5, 164.6$  (d,  $J = 250.4$  Hz), 131.1, 130.8 (d,  $J = 3.2$  Hz), 130.4, 129.2, 129.1, 115.7, 115.4, 63.7, 43.3, 41.0, 39.5, 36.4, 31.9, 30.5, 26.0, 25.7; HRMS (EI) Calcd. For  $\text{C}_{18}\text{H}_{24}\text{FNO}_2$   $[\text{M}]^+$ : 305.1791. Found: 305.1787.

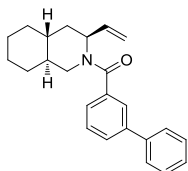

**(**1,1'**-biphenyl)-3-yl[(**3S,4aR,8aS**)-3-vinyloctahydroisoquinolin-2(**1H**)-yl]methanone **S26****

Colorless oil; yield 55%:  $[\alpha]_{\text{D}}^{28} -29$  (*c* 0.90,  $\text{CHCl}_3$ );  $^1\text{H}$  NMR (400 MHz):  $\delta = 7.63\text{--}7.56$  (m, 4H), 7.49–7.42 (m, 3H), 7.39–7.36 (m, 2H), 5.87 (ddd,  $J = 17.4, 10.6, 3.8$  Hz, 0.4H), 5.77 (ddd,  $J = 17.6, 10.8, 3.6$  Hz, 0.6H), 5.56 (brs, 0.4H), 5.30–5.27 (m, 1H),

5.23-5.15 (m, 1H), 4.50 (d,  $J = 12.4, 3.6$  Hz, 0.6H), 4.49 (brs, 0.6H), 3.44 (dd,  $J = 13.4, 3.8$  Hz, 0.4H), 2.84 (dd,  $J = 13.2, 11.6$  Hz, 0.4H), 2.61 (dd,  $J = 13.2, 11.2$  Hz, 0.6H), 1.84-1.52 (m, 5H), 1.46-1.19 (m, 5.4H), 1.00-0.97 (m, 1H), 0.88-0.82 (m, 0.6H);  $^{13}\text{C}$  NMR (100 MHz):  $\delta = 171.1, 170.5, 141.5, 141.4, 141.41, 140.36, 137.2, 137.15, 137.11, 136.7, 128.9, 128.11, 128.06, 127.62, 127.59, 127.2, 127.1, 125.54, 125.48, 125.0, 124.9, 116.6, 116.1, 77.2, 57.2, 50.7, 49.6, 43.4, 42.8, 41.9, 37.4, 36.8, 36.7, 35.9, 32.8, 29.9, 29.7, 26.1, 26.0, 25.8, 25.6$ ; HRMS (EI) Calcd. For  $\text{C}_{24}\text{H}_{27}\text{NO}_2$   $[\text{M}]^+$ : 345.2093. Found: 345.2090.

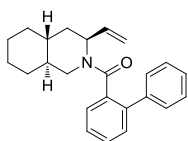

**(1,1'-biphenyl)-2-yl[(3*S*,4*aR*,8*aS*)-3-vinyloctahydroisoquinolin-2(1*H*)-yl]methanone S27**

Colorless oil; yield 55%:  $^1\text{H}$  NMR (400 MHz):  $\delta = 7.55-7.53$  (m, 2H), 7.48-7.33 (m, 7H), 5.72 (ddd,  $J = 17.5, 10.7, 3.7$  Hz, 0.38H), 5.49 (ddd,  $J = 17.3, 10.5, 3.7$  Hz, 0.38H), 5.43 (brs, 0.38H), 5.28 (ddd,  $J = 17.8, 10.6, 3.7$  Hz, 0.24H), 5.21-5.19 (m, 0.38H), 5.09 (s, 0.38H), 5.06-5.04 (m, 0.38H), 4.94-4.90 (m, 0.38H), 4.88-4.85 (m, 0.24H), 4.74 (m, 0.24H), 4.38 (dd,  $J = 12.6, 4.2$  Hz, 0.38H), 4.34 (m, 0.38H), 4.01 (brs, 0.24H), 3.89 (brs, 0.38H), 2.90 (dd,  $J = 13.0, 3.8$  Hz, 0.24H), 2.80 (dd,  $J = 13.4, 3.4$  Hz, 0.38H), 2.44 (t,  $J = 12.4$  Hz, 0.38H), 2.37 (t,  $J = 12.4$  Hz, 0.38H), 2.21 (t,  $J = 12.4$  Hz, 0.24H), 2.00 (m, 0.24H), 1.67-1.52 (m, 4.38H), 1.39-0.82 (m, 5H), 0.59-0.47 (m, 1.24H),  $-0.02$ – $-0.84$  (m, 0.38H),  $-0.77$ – $-0.86$  (m, 0.38H);  $^{13}\text{C}$  NMR (100 MHz):  $\delta = 170.6, 170.1, 140.1, 140.0, 139.8, 138.8, 138.3, 138.1, 138.0, 136.8, 136.5, 136.3, 136.2, 136.0, 135.9, 129.6, 129.3, 129.2, 129.13, 129.06, 129.0, 128.94, 128.86, 128.6, 128.5, 128.4, 128.2, 128.0, 127.8, 127.7, 127.63, 127.59, 127.5, 127.4, 126.6, 115.9, 115.8, 115.7, 56.0, 50.4, 50.0, 48.6, 48.4, 42.9, 42.4, 40.7, 40.6, 36.4, 36.1, 35.9, 35.7, 35.6, 35.4, 32.8, 32.7, 32.6, 29.73, 29.68, 29.6, 29.3, 26.0, 25.9, 25.7, 25.6, 25.4$ ; HRMS (EI) Calcd. For  $\text{C}_{24}\text{H}_{27}\text{NO}_2$   $[\text{M}]^+$ : 345.2093. Found: 345.2096.

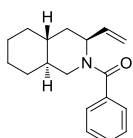

**Phenyl[(3*S*,4*aR*,8*aS*)-3-vinyloctahydroisoquinolin-2(1*H*)-yl]methanone S28**

Colorless oil; yield 55%:  $[\alpha]_{\text{D}}^{28} -12$  ( $c$  0.45,  $\text{CHCl}_3$ );  $^1\text{H}$  NMR (400 MHz):  $\delta = 7.40-7.37$  (m, 5H), 5.85 (ddd,  $J = 17.5, 10.7, 3.7$  Hz, 0.4H), 5.75 (ddd,  $J = 17.4, 10.6, 3.6$  Hz, 0.38H), 5.43 (brs, 0.38H), 5.28 (ddd,  $J = 17.8, 10.6, 3.7$  Hz, 0.24H), 5.21-5.19 (m, 0.38H), 5.09 (s, 0.38H), 5.06-5.04 (m, 0.38H), 4.94-4.90 (m, 0.38H), 4.88-4.85 (m, 0.24H), 4.74 (m, 0.24H), 4.38 (dd,  $J = 12.6, 4.2$  Hz, 0.38H), 4.34 (m, 0.38H), 4.01 (brs, 0.24H), 3.89 (brs, 0.38H), 2.90 (dd,  $J = 13.0, 3.8$  Hz, 0.24H), 2.80 (dd,  $J = 13.4, 3.4$  Hz, 0.38H), 2.44 (t,  $J = 12.4$  Hz, 0.38H), 2.37 (t,  $J = 12.4$  Hz, 0.38H), 2.21 (t,  $J = 12.4$  Hz, 0.24H), 2.00 (m, 0.24H), 1.67-1.52 (m, 4.38H), 1.39-0.82 (m, 5H), 0.59-0.47 (m, 1.24H),  $-0.02$ – $-0.84$  (m, 0.38H),  $-0.77$ – $-0.86$  (m, 0.38H);  $^{13}\text{C}$  NMR (100 MHz):  $\delta = 170.6, 170.1, 140.1, 140.0, 139.8, 138.8, 138.3, 138.1, 138.0, 136.8, 136.5, 136.3, 136.2, 136.0, 135.9, 129.6, 129.3, 129.2, 129.13, 129.06, 129.0, 128.94, 128.86, 128.6, 128.5, 128.4, 128.2, 128.0, 127.8, 127.7, 127.63, 127.59, 127.5, 127.4, 126.6, 115.9, 115.8, 115.7, 56.0, 50.4, 50.0, 48.6, 48.4, 42.9, 42.4, 40.7, 40.6, 36.4, 36.1, 35.9, 35.7, 35.6, 35.4, 32.8, 32.7, 32.6, 29.73, 29.68, 29.6, 29.3, 26.0, 25.9, 25.7, 25.6, 25.4$ ; HRMS (EI) Calcd. For  $\text{C}_{24}\text{H}_{27}\text{NO}_2$   $[\text{M}]^+$ : 345.2093. Found: 345.2096.

Hz, 0.6H), 5.53 (brs, 0.4H), 5.29-5.26 (m, 1H), 5.21-5.11 (m, 1H), 4.47 (dd,  $J = 13.2$ , 4.0 Hz, 0.6H), 4.43 (brs, 0.6H), 3.39 (dd,  $J = 13.4$ , 3.4 Hz, 0.4H), 2.81 (dd,  $J = 13.0$ , 11.8 Hz, 0.4H), 2.58 (dd,  $J = 12.8$ , 11.6 Hz, 0.6H), 1.83-1.50 (m, 5H), 1.44-1.18 (m, 5H), 1.14-1.06 (m, 0.4H), 0.99-0.97 (m, 1H), 0.88-0.82 (m, 0.6H);  $^{13}\text{C}$  NMR (100 MHz):  $\delta = 171.2$ , 170.6, 137.1, 136.7, 136.6, 129.4, 129.3, 128.41, 128.38, 126.8, 126.2, 116.5, 116.0, 57.1, 50.7, 49.6, 43.4, 42.7, 41.9, 37.4, 36.7, 35.9, 32.9, 29.9, 29.6, 26.2, 26.1, 25.8, 25.7; HRMS (EI) Calcd. For  $\text{C}_{18}\text{H}_{23}\text{NO}$   $[\text{M}]^+$ : 296.1780. Found: 296.1784.

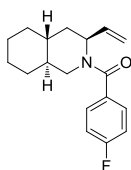

**(4-fluorophenyl)[(3S,4aR,8aS)-3-vinyloctahydroisoquinolin-2(1H)-yl]methanone**

**S29**

Colorless oil; yield 58%;  $[\alpha]_D^{28} -8.9$  ( $c$  0.77,  $\text{CHCl}_3$ );  $^1\text{H}$  NMR (400 MHz):  $\delta = 7.43$ -7.40 (m, 2H), 7.12-7.04 (m, 2H), 5.85 (ddd,  $J = 17.5$ , 10.7, 3.7 Hz, 0.4H), 5.76 (ddd,  $J = 17.4$ , 10.6 3.6 Hz, 0.6H), 5.50 (brs, 0.4H), 5.30-5.27 (m, 1H), 5.20-5.12 (m, 1H), 4.44 (dd,  $J = 13.2$ , 4.0 Hz, 0.6H), 4.43 (brs, 0.6H), 3.37 (dd,  $J = 13.4$ , 3.4 Hz, 0.4H), 2.83 (dd,  $J = 13.0$ , 11.8 Hz, 0.4H), 2.58 (dd,  $J = 12.8$ , 11.6 Hz, 0.6H), 1.83-1.49 (m, 5H), 1.44-1.17 (m, 5H), 1.14-1.05 (m, 0.4H), 0.99-0.95 (m, 1H), 0.89-0.80 (m, 0.6H);  $^{13}\text{C}$  NMR (100 MHz):  $\delta = 170.3$ , 169.7, 163.3 (d,  $J = 247.3$  Hz), 163.2 (d,  $J = 247.8$  Hz), 137.0, 136.6, 132.6 (d,  $J = 3.4$  Hz), 129.1, 129.0, 128.6, 128.5, 116.6, 116.1, 115.6, 115.5, 115.4, 115.3, 57.3, 50.9, 49.7, 43.6, 42.8, 41.8, 37.5, 36.7, 35.9, 32.8, 29.9, 29.6, 26.1, 26.0, 25.8, 25.6; HRMS (EI) Calcd. For  $\text{C}_{18}\text{H}_{22}\text{FNO}$   $[\text{M}]^+$ : 287.1685. Found: 287.1689.

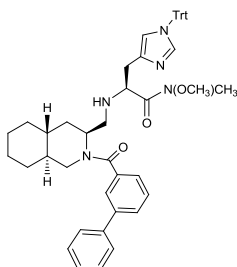

**(S)-2-[(3S,4aR,8aS)-2-[(1,1'-biphenyl)-3-carbonyl]decahydroisoquinolin-3-yl]methylamino]-N-methoxy-N-methyl-3-(1-trityl-1H-imidazol-4-yl)propanamide S30**

Colorless oil; yield 65%;  $[\alpha]_D^{28} -18$  ( $c$  0.67,  $\text{CHCl}_3$ );  $^1\text{H}$  NMR (400 MHz):  $\delta = 7.60$ -7.53 (m, 4H), 7.45-7.29 (m, 15H), 7.14-7.08 (m, 6H), 6.61 (brs, 0.55H), 6.53 (brs,

0.45H), 4.91 (m, 0.55H), 4.43 (dd,  $J = 13.4, 3.8$  Hz, 0.45H), 4.13-4.11 (m, 0.45H), 3.90 (m, 1H), 3.67 (s, 1.65H), 3.45 (s, 1.35H), 3.37 (dd,  $J = 13.4, 3.8$  Hz, 0.55H), 3.13 (s, 1.65H), 3.04 (s, 1.35H), 2.90-2.76 (m, 2.55H), 2.73-2.64 (m, 2H), 2.48-2.42 (m, 0.45H), 1.82-1.52 (m, 4.55H), 1.35-1.19 (m, 5.45H), 1.04-0.78 (m, 2H);  $^{13}\text{C}$  NMR (100 MHz):  $\delta = 175.4, 175.1, 171.3, 170.6, 142.52, 142.45, 141.34, 141.31, 140.5, 140.4, 138.2, 138.1, 137.69, 137.65, 137.58, 137.3, 129.8, 129.7, 127.93, 127.89, 127.8, 127.7, 127.5, 127.4, 127.2, 127.1, 125.6, 125.45, 125.37, 125.3, 119.2, 77.2, 75.04, 75.02, 61.7, 61.4, 57.9, 57.4, 55.5, 49.6, 48.2, 47.1, 46.5, 43.0, 42.6, 42.3, 42.1, 36.4, 36.2, 34.5, 33.0, 32.9, 32.5, 32.3, 32.0, 30.0, 29.7, 26.2, 26.1, 25.9, 25.7$ ; HRMS (EI) Calcd. For  $\text{C}_{50}\text{H}_{53}\text{N}_5\text{O}_3$   $[\text{M}]^+$ : 771.4148. Found: 771.4141.

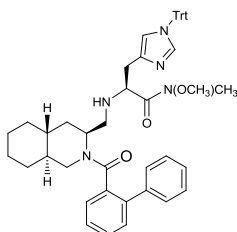

**(S)-2-[(*(3S,4aR,8aS)*-2-[(1,1'-biphenyl)-2-carbonyl]decahydroisoquinolin-3-yl)methylamino]-*N*-methoxy-*N*-methyl-3-(1-trityl-1*H*-imidazol-4-yl)propanamide S31**

Colorless oil; yield 62%:  $^1\text{H}$  NMR (400 MHz):  $\delta = 7.52-7.48$  (m, 1.4H), 7.45-7.29 (m, 17.6H), 7.14-7.12 (m, 6H), 6.60 (brs, 0.6H), 6.55 (brs, 0.3H), 6.51 (brs, 0.1H), 4.93-4.91 (m, 0.3H), 4.87-4.84 (m, 0.1H), 4.78 (dd,  $J = 13.2, 7.2$  Hz, 0.6H), 4.72-4.70 (m, 0.3H), 4.46-4.43 (m, 0.1H), 4.39 (dd,  $J = 13.6, 4.0$  Hz, 0.6H), 4.07 (m, 0.6H), 4.01 (m, 0.4H), 3.82-3.76 (m, 0.6H), 3.69 (s, 1.8H), 3.64 (s, 0.9H), 3.61 (s, 0.6H), 3.33-3.30 (m, 0.1H), 3.27-3.22 (m, 0.3H), 3.18 (s, 0.9H), 3.14 (s, 1.8H), 2.97-2.95 (m, 0.3H), 2.88-2.67 (m, 2H), 2.55-2.44 (m, 1H), 2.38-1.83 (m, 2.7H), 1.66-1.50 (m, 2H), 1.35-1.03 (m, 3H), 0.89-0.81 (m, 2H), 0.69 (td,  $J = 12.8, 5.5$  Hz, 0.6H), 0.59-0.36 (m, 1.4H),  $-0.23$  (td,  $J = 13.1, 5.7$  Hz, 0.1H),  $-0.35$  (td,  $J = 12.7, 5.5$  Hz, 0.3H),  $-0.73$ - $-0.89$  (0.6H, m);  $^{13}\text{C}$  NMR (100 MHz):  $\delta = 175.5, 170.3, 169.9, 142.54, 142.52, 142.48, 140.1, 139.93, 139.85, 138.3, 138.2, 138.1, 137.81, 137.76, 137.3, 136.4, 136.2, 129.8, 129.7, 129.1, 128.9, 128.85, 128.76, 128.73, 128.66, 128.52, 128.47, 128.4, 128.3, 128.03, 127.96, 127.93, 127.90, 127.87, 127.7, 127.5, 127.4, 119.2, 119.1, 77.2, 75.0, 62.6, 61.7, 61.5, 61.4, 61.0, 57.8, 57.5, 57.4, 54.5, 51.1, 48.8, 48.6, 48.5, 47.8, 47.5, 47.4, 46.4, 42.4, 41.9, 40.59, 40.56, 40.2, 35.96, 35.94, 35.5, 35.4, 33.0, 32.80, 32.78, 32.7, 32.32, 32.26, 32.1, 32.0, 31.6, 29.8, 29.6, 29.4, 29.3, 25.99, 25.97, 25.84, 25.78, 25.6, 25.46, 25.38$ ; HRMS (EI) Calcd. For  $\text{C}_{50}\text{H}_{53}\text{N}_5\text{O}_3$   $[\text{M}]^+$ : 771.4148. Found: 771.4154.

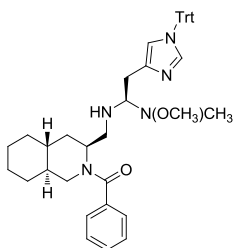

**{(3*S*,4*aR*,8*aS*)-3-[(*R*)-1-[methoxy(methyl)amino]-2-(1-trityl-1*H*-imidazol-4-yl)ethyl]amino)methyl]octahydroisoquinolin-2(1*H*)-yl}(phenyl)methanone S32**

Colorless oil; yield 55%:  $[\alpha]_{\text{D}}^{28} -23$  (*c* 0.12,  $\text{CHCl}_3$ );  $^1\text{H NMR}$  (400 MHz):  $\delta = 7.31$  (brs, 15H), 7.11 (brs, 6H), 6.61 (brs, 0.6H), 6.54 (brs, 0.4H), 4.89 (brs, 0.6H), 4.41 (d,  $J = 10.8$  Hz, 0.4H), 4.12 (brs, 0.6H), 3.90 (brs, 0.4H), 3.82 (brs, 0.4H), 3.66 (s, 1.8H), 3.50 (s, 1.2H), 3.30 (d,  $J = 10.8$  Hz, 0.6H), 3.13 (s, 1.8H), 3.08 (s, 1.2H), 2.87-2.80 (m, 2.6H), 2.66-2.61 (m, 2H), 2.43 (t,  $J = 12.0$  Hz, 0.4H), 1.79-1.69 (m, 3H), 1.60-1.53 (m, 2H), 1.35-1.26 (m, 5H), 1.03-0.80 (m, 2H);  $^{13}\text{C NMR}$  (100 MHz):  $\delta = 175.5, 175.3, 171.4, 170.7, 142.5, 142.4, 138.2, 138.1, 137.7, 137.3, 137.1, 137.0, 129.75, 129.70, 129.01, 128.96, 128.33, 128.29, 127.93, 127.88, 126.7, 126.6, 119.2, 77.2, 75.0, 61.7, 61.5, 57.9, 57.4, 55.4, 49.4, 48.2, 47.1, 46.5, 43.0, 42.5, 42.1, 36.4, 36.2, 34.4, 33.0, 32.9, 32.6, 32.3, 32.1, 29.9, 29.7, 26.2, 26.1, 25.8, 25.7$ ; HRMS (EI) Calcd. For  $\text{C}_{44}\text{H}_{49}\text{N}_5\text{O}_3$   $[\text{M}]^+$ : 695.3835. Found: 695.3829.

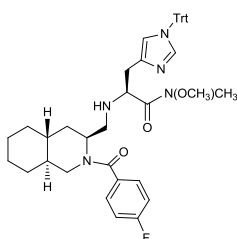

**(*S*)-2-([(3*S*,4*aR*,8*aS*)-2-(4-fluorobenzoyl)decahydroisoquinolin-3-yl]methyl)amino)-*N*-methoxy-*N*-methyl-3-(1-trityl-1*H*-imidazol-4-yl)propanamide S33**

Colorless oil; yield 55%:  $[\alpha]_{\text{D}}^{28} -17$  (*c* 0.65,  $\text{CHCl}_3$ );  $^1\text{H NMR}$  (400 MHz):  $\delta = 7.42-7.39$  (m, 1.2H), 7.36-7.31 (m, 10.8H), 7.12-7.10 (m, 6H), 7.04-6.97 (m, 2H), 6.60 (brs, 0.6H), 6.55 (brs, 0.4H), 4.89-4.87 (m, 0.6H), 4.37 (dd,  $J = 13.2, 3.6$  Hz, 0.4H), 4.11 (brs, 0.4H), 3.91 (m, 0.4H), 3.82 (m, 0.6H), 3.65 (s, 1.8H), 3.52 (s, 1.2H), 3.28 (d,  $J = 13.2, 3.6$  Hz, 0.6H), 3.13 (s, 1.8H), 3.09 (s, 1.2H), 2.91-2.80 (m, 2.6H), 2.73-2.63 (m, 2H), 2.46-2.40 (m, 0.4H), 1.77-1.66 (m, 3H), 1.60-1.52 (m, 2H), 1.36-1.24 (m, 5H), 1.03-0.82 (m, 2H);  $^{13}\text{C NMR}$  (100 MHz):  $\delta = 175.5, 175.2, 170.6, 169.8, 163.0$  (d,  $J = 247.2$  Hz), 162.9 (d,  $J = 246.9$  Hz), 142.5, 142.4, 138.2, 138.1, 137.6, 137.2, 133.1 (d,  $J$



= 3.4 Hz), 133.0 (d,  $J = 3.5$  Hz), 129.73, 129.70, 129.2, 129.1, 128.9, 128.8, 127.92, 127.89, 119.24, 119.22, 115.4, 115.2, 77.2, 75.0, 61.6, 61.5, 57.9, 57.5, 55.6, 49.5, 48.4, 47.2, 46.6, 43.2, 42.6, 42.0, 36.4, 36.2, 34.5, 33.0, 32.9, 32.7, 32.3, 32.0, 29.9, 29.7, 26.1, 26.0, 25.8, 25.7; HRMS (EI) Calcd. For  $C_{44}H_{48}FN_5O_3$   $[M]^+$ : 713.3741. Found: 771.3748.

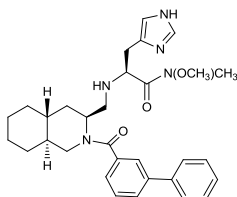

**(S)-2-[(3S,4aR,8aS)-2-[(1,1'-biphenyl)-3-carbonyl]decahydroisoquinolin-3-yl)methylamino]-3-(1H-imidazol-4-yl)-N-methoxy-N-methylpropanamide S34**

Colorless oil; yield 78%:  $[\alpha]_D^{28} -35$  ( $c$  0.27,  $CHCl_3$ );  $^1H$  NMR (400 MHz):  $\delta = 7.66-7.63$  (d,  $J = 9.6$  Hz, 2H), 7.58-7.55 (m, 2H), 7.50-7.41 (m, 3.6H), 7.39-7.35 (m, 1.4H), 7.26 (s, 1H), 6.84 (s, 0.6H), 6.83 (s, 0.4H), 5.03-5.01 (m, 0.4H), 4.32 (dd,  $J = 13.2, 3.2$  Hz, 0.6H), 4.13-4.11 (m, 0.6H), 3.88-3.86 (m, 0.4H), 3.72 (s, 1.2H), 3.64 (s, 1.8H), 3.57-3.55 (m, 0.6H), 3.48 (dd,  $J = 13.0, 3.4$  Hz, 0.4H), 3.24 (s, 1.2H), 3.18 (s, 1.8H), 3.00-2.86 (m, 1H), 2.73-2.62 (m, 2H), 2.55-2.44 (m, 2H), 1.79-1.68 (m, 3H), 1.64-1.44 (m, 2H), 1.41-1.19 (m, 5H), 1.14-0.82 (m, 2H);  $^{13}C$  NMR (100 MHz):  $\delta = 174.3, 171.1, 141.7, 141.6, 140.3, 140.2, 137.2, 137.0, 135.6, 134.8, 129.3, 128.89, 128.87, 128.2, 127.69, 127.65, 127.2, 127.1, 126.5, 126.1, 125.29, 125.27, 77.2, 61.7, 59.8, 58.4, 55.7, 49.5, 49.4, 48.5, 48.0, 43.4, 42.6, 42.0, 36.65, 36.58, 34.3, 34.0, 33.0, 32.9, 32.2, 30.0, 29.6, 26.2, 26.0, 25.8, 25.6$ ; HRMS (EI) Calcd. For  $C_{31}H_{39}N_5O_3$   $[M]^+$ : 529.3053. Found: 529.3057.

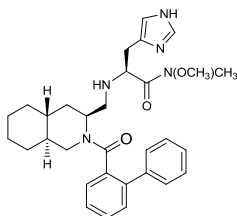

**(S)-2-[(3S,4aR,8aS)-2-[(1,1'-biphenyl)-2-carbonyl]decahydroisoquinolin-3-yl)methylamino]-3-(1H-imidazol-4-yl)-N-methoxy-N-methylpropanamide S35**

Colorless oil; yield 84%:  $^1H$  NMR (400 MHz):  $\delta = 7.65$  (brs, 1H), 7.52-7.30 (m, 9H), 6.83 (m, 0.9H), 6.75 (brs, 0.1H), 5.14-5.12 (m, 0.1H), 4.92 (brs, 0.6H), 4.78-4.76 (m, 0.3H), 4.46-4.43 (m, 0.1H), 4.37 (dd,  $J = 13.2, 3.6$  Hz, 0.6H), 3.80 (m, 1H), 3.71 (s,

0.9H), 3.67 (s, 0.3H), 3.62 (s, 1.8H), 3.50 (m, 0.4H), 3.38 (m, 0.6H), 3.25 (m, 0.3H), 3.23 (s, 0.9H), 3.18 (s, 1.8H), 2.99-2.86 (m, 2.3H), 2.74-2.54 (m, 2H), 2.47-1.97 (m, 2H), 1.66-1.53 (2H, m), 1.43-1.02 (4H, m), 0.86 (2H, m), 0.59-0.38 (m, 1.4H), -0.21 (brs, 0.3H), -0.78--0.86 (m, 0.3H);  $^{13}\text{C}$  NMR (100 MHz):  $\delta = 174.3, 172.0, 170.6, 170.1, 140.2, 139.9, 139.8, 138.8, 138.4, 138.1, 137.9, 137.8, 136.3, 136.0, 135.9, 135.5, 134.7, 134.4, 129.6, 126.5, 129.4, 129.12, 129.08, 129.0, 128.9, 128.7, 128.6, 128.5, 128.2, 127.8, 127.7, 127.64, 127.58, 127.42, 127.38, 126.5, 77.2, 61.7, 59.6, 58.4, 57.7, 55.3, 54.3, 48.9, 48.8, 48.4, 48.3, 48.1, 47.8, 45.7, 42.5, 41.8, 40.5, 40.4, 36.0, 35.7, 33.3, 32.8, 32.7, 32.6, 32.2, 29.7, 29.6, 29.5, 29.3, 26.0, 25.9, 25.7, 25.5, 25.3$ ; HRMS (EI) Calcd. For  $\text{C}_{31}\text{H}_{39}\text{N}_5\text{O}_3$   $[\text{M}]^+$ : 529.3053. Found: 529.3046.

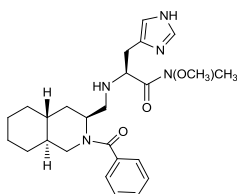

**(S)-2-(((3S,4aR,8aS)-2-benzoyldecahydroisoquinolin-3-yl)methyl)amino)-3-(1H-imidazol-4-yl)-N-methoxy-N-methylpropanamide S36**

Colorless oil; yield 74%;  $[\alpha]_{\text{D}}^{28} -45$  ( $c$  0.29,  $\text{CHCl}_3$ );  $^1\text{H}$  NMR (400 MHz):  $\delta = 7.67$  (brs, 0.6H), 7.43-7.40 (m, 4.4H), 7.33-7.31 (m, 1H), 6.83 (s, 0.6H), 6.81 (s, 0.4H), 5.00 (m, 0.4H), 4.28 (brd,  $J = 12.0$  Hz, 0.6H), 4.07 (brs, 0.6H), 3.84-3.81 (m, 0.4H), 3.72 (s, 1.2H), 3.66 (s, 1.8H), 3.51 (brs, 0.6H), 3.43 (d,  $J = 11.2$  Hz, 0.4H), 3.24 (s, 1.2H), 3.19 (s, 1.8H), 2.99-2.84 (m, 1.4H), 2.72-2.59 (m, 2H), 2.48-2.42 (m, 1.6H), 1.77-1.58 (m, 4H), 1.46-1.21 (m, 6H), 1.13-0.94 (m, 1.4H), 0.90-0.81 (m, 0.6H);  $^{13}\text{C}$  NMR (100 MHz):  $\delta = 174.3, 171.2, 136.6, 136.5, 135.8, 134.8, 130.1, 129.5, 128.7, 128.5, 127.6, 126.6, 125.7, 77.2, 61.7, 59.9, 58.5, 55.6, 49.3, 48.6, 43.4, 42.6, 42.0, 36.6, 34.2, 33.0, 32.9, 32.2, 30.0, 29.6, 26.2, 26.0, 25.8, 25.6$ ; HRMS (EI) Calcd. For  $\text{C}_{25}\text{H}_{35}\text{N}_5\text{O}_3$   $[\text{M}]^+$ : 453.2740. Found: 453.2744.

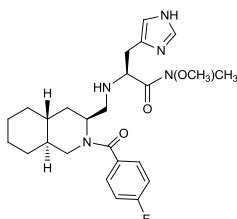

**(S)-2-(((3S,4aR,8aS)-2-(4-fluorobenzoyl)decahydroisoquinolin-3-yl)methyl)amino)-3-(1H-imidazol-4-yl)-N-methoxy-N-methylpropanamide S37**

Colorless oil; yield 78%:  $[\alpha]_D^{28} -35$  ( $c$  0.41,  $\text{CHCl}_3$ );  $^1\text{H}$  NMR (400 MHz):  $\delta =$  7.75-7.69 (m, 0.4H), 7.66 (s, 0.6H), 7.48-7.44 (m, 1.2H), 7.37 (s, 0.4H), 7.34-7.30 (m, 1H), 7.12-7.06 (m, 1.4H), 6.83 (s, 0.6H), 6.81 (s, 0.4H), 4.98-4.96 (m, 0.4H), 4.24 (dd,  $J = 13.2, 3.2$  Hz, 0.6H), 4.05-4.02 (m, 0.6H), 3.86-3.84 (m, 0.4H), 3.72 (s, 1.2H), 3.66 (s, 1.8H), 3.56-3.54 (m, 0.4H), 3.39 (dd,  $J = 13.4, 3.4$  Hz, 0.4H), 3.24 (s, 1.2H), 3.20 (s, 1.8H), 2.95-2.83 (m, 1.2H), 2.72-2.64 (m, 2H), 2.50-2.43 (m, 2H), 1.76-1.36 (m, 5H), 1.33-1.25 (m, 5H), 1.06-0.97 (m, 1.4H), 0.89-0.83 (m, 0.6H);  $^{13}\text{C}$  NMR (100 MHz):  $\delta =$  174.3, 173.3, 170.2, 163.6 (d,  $J = 249.1$  Hz), 163.2 (d,  $J = 248.1$  Hz), 135.6, 134.7, 132.6 (d,  $J = 3.4$  Hz), 132.5 (d,  $J = 3.4$  Hz), 130.0, 129.9, 128.9, 128.82, 128.78, 127.5, 127.3, 127.0, 115.9, 115.71, 115.65, 115.4, 77.2, 61.7, 59.7, 58.3, 55.8, 49.6, 49.4, 48.6, 48.0, 43.6, 42.6, 42.0, 36.6, 34.2, 34.0, 33.0, 32.8, 32.2, 29.9, 29.6, 26.1, 26.0, 25.8, 25.6; HRMS (EI) Calcd. For  $\text{C}_{25}\text{H}_{34}\text{FN}_5\text{O}_3$   $[\text{M}]^+$ : 471.2646. Found: 471.2644.

**(7) Figure S-1: Separation of diastereomer mixture on a reversed-phase HPLC**

**(a) Separation of 18 and 20**

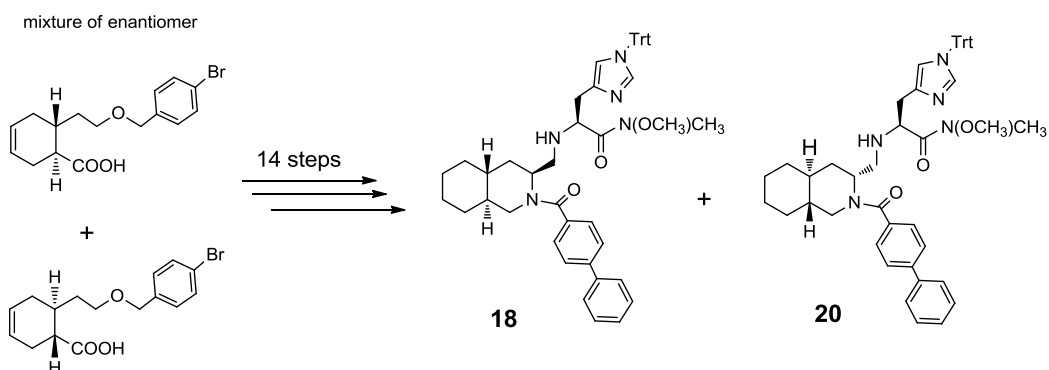

CH<sub>3</sub>CN 0-100%/40 min, detected at 254 nm, flow: 0.9 mL/min,  
YMC Pack ODS (4.6×150 mm); *t<sub>R</sub>* 30.22 min, 31.02 min

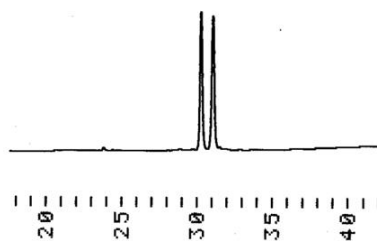

**(b) Separation of 19 and 21**

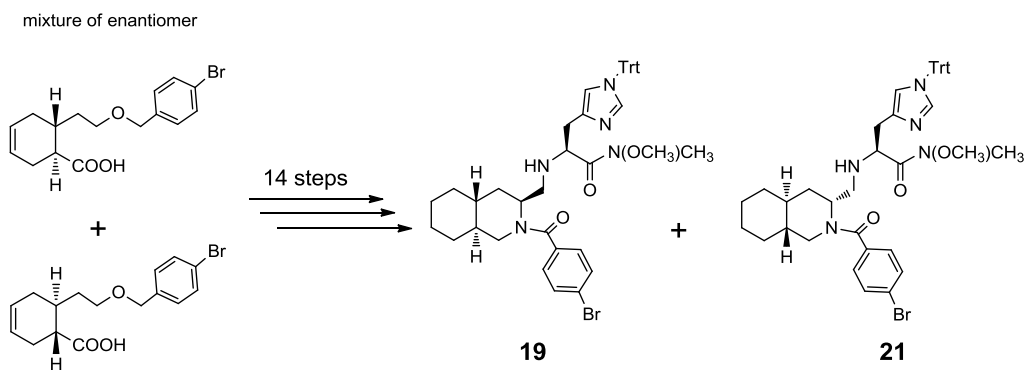

CH<sub>3</sub>CN 0-100%/40 min, detected at 254 nm, flow: 0.9 mL/min,  
YMC Pack ODS (4.6×150 mm); *t<sub>R</sub>* 27.75 min, 29.91 min

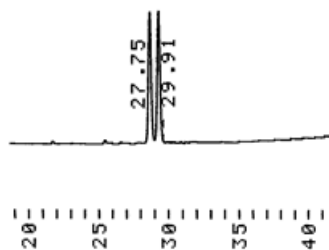

**(8) Figure S-2: Separation of enantiomer on a chiral column**

(a) Separation of **27** and **28** as the corresponding methyl ester

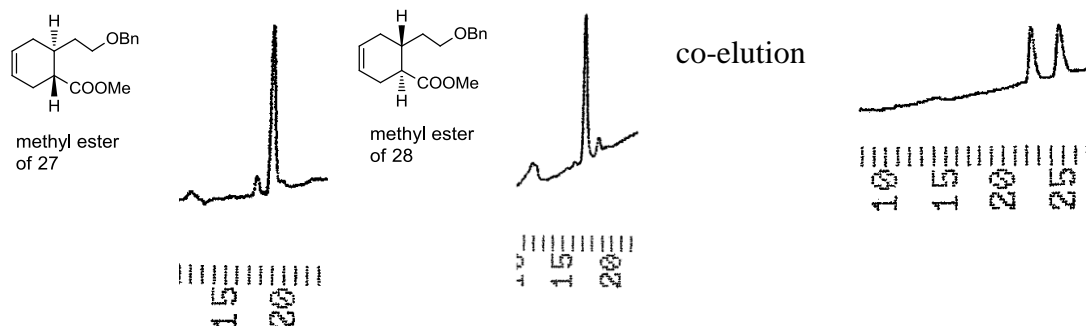

2-propanol:hexane=1:560, detected at 254nm, flow: 1 mL/min, YMC CHIRAL Amylose-C (4.6×250 mm)

(b) Separation of **30** and **31** as the corresponding methyl ester

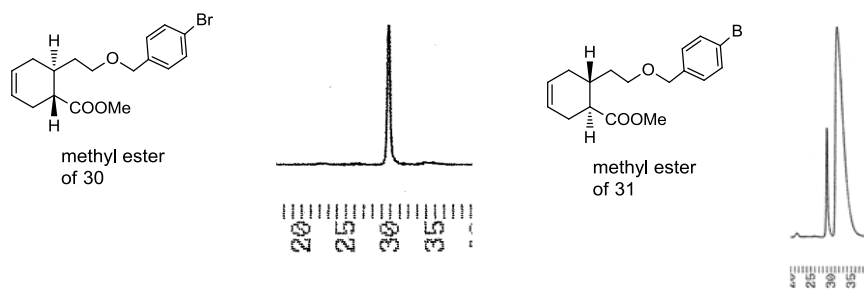

From the minor peak in front of the major peak,  
no mass-value related to 30/31 was observed

co-elution

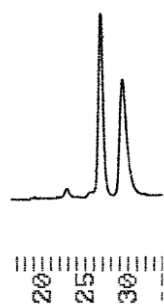

2-propanol:hexane=1:560, detected at 254 nm, flow: 1 mL/min, YMC CHIRAL Amylose-C (4.6×250 mm)

**(9) Figure S-3: Elution profiles of 38 and 42 on a reversed-phase HPLC**

CH<sub>3</sub>CN 0-100%/40 min, detected at 254 nm, flow: 0.9 mL/min, YMC Pack ODS (4.6×150 mm)

(a) Profile of **38** ( $t_R$  30.86 min)

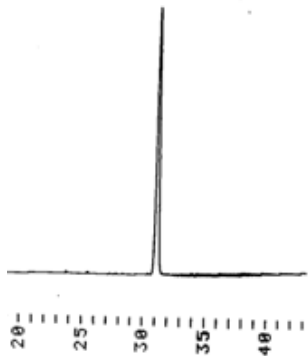

(b) Co-eluted with **18** and **20**

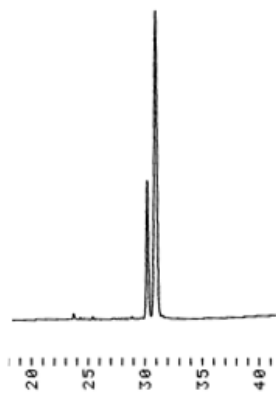

$t_R$  30.16 min, 30.88 min

(c) Profile of **42** ( $t_R$  29.99 min)

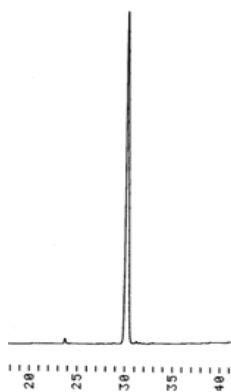

(d) Co-eluted with **18** and **20**

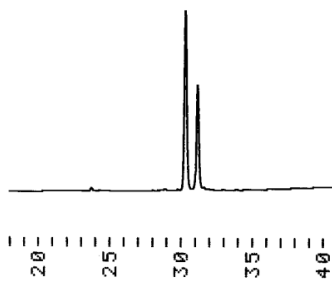

$t_R$  30.27 min, 31.15 min

**(10) Figure S-4: Elution profiles of 39 and 43 on a reversed-phase HPLC**

CH<sub>3</sub>CN 0-100%/40 min, detected at 254nm, flow : 0.9 mL/min, YMC Pack ODS (4.6×150 mm)

(a) Profile of **39** ( $t_R$  29.30 min)

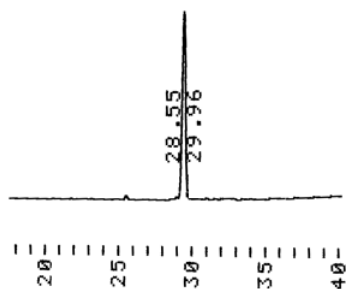

(b) Co-eluted with **19** and **21**

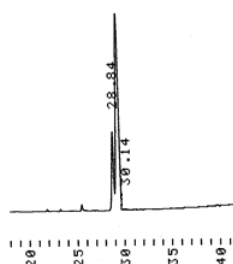

$t_R$  28.84 min, 29.31min

(c) Profile of **43** ( $t_R$  28.68 min)

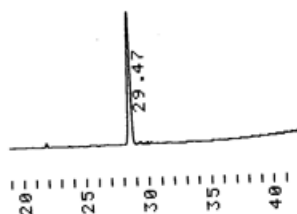

(d) Co-eluted with **19** and **21**

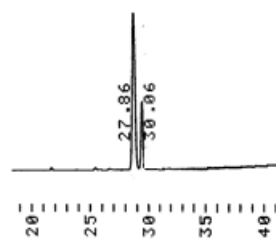

$t_R$  28.67 min, 29.42 min

**(11) Figure S-5: HPLC profiles of 40, 41, and 44-49**

YMC Pack ODS (4.6×150 mm), detected at 254 nm, flow: 0.9 mL/min,

Elution condition A; CH<sub>3</sub>CN 25-45%/40 min

B; CH<sub>3</sub>CN 20-40%/40 min

C; CH<sub>3</sub>CN 15-35%/40 min

**40**

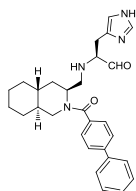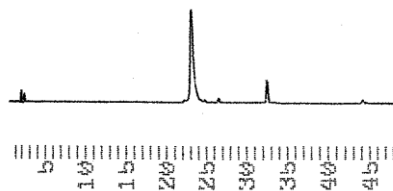

Condition A

$t_R$  23.14 min

**41**

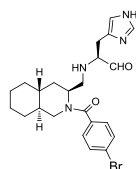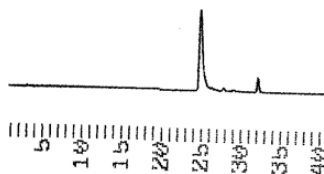

Condition B

$t_R$  23.93 min

**44**

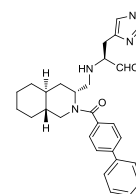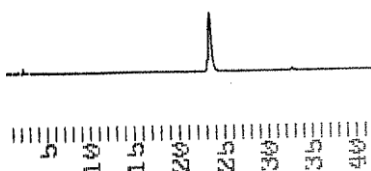

Condition A

$t_R$  23.16 min

**45**

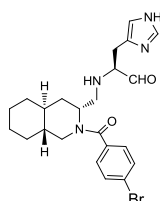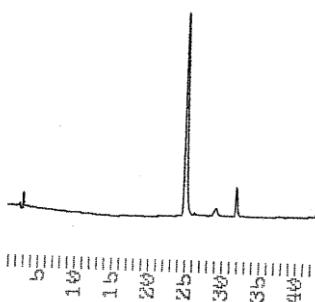

Condition B

$t_R$  25.49 min



46

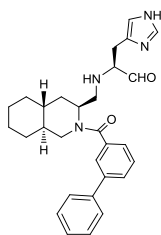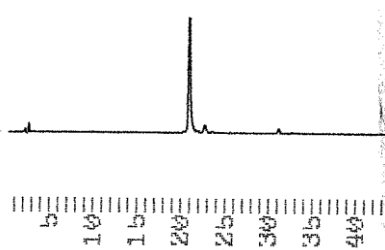

Condition A  
 $t_R$  20.52 min

47

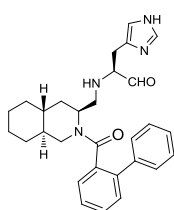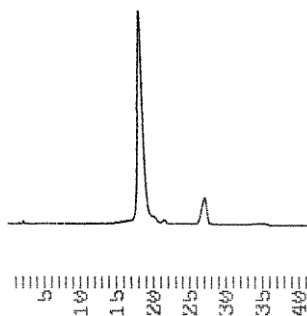

Condition A  
 $t_R$  18.14 min

48

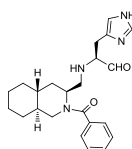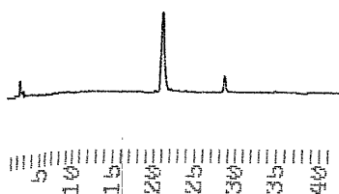

Condition C  
 $t_R$  19.90 min

49

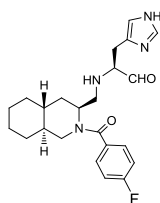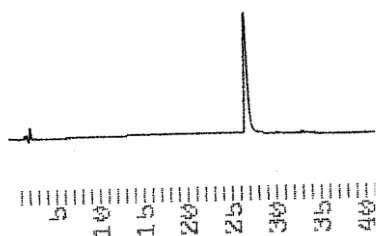

Condition B  
 $t_R$  26.88 min

(12) Figure S-6: IC<sub>50</sub> values of 41 (63 μM) obtained from sigmoidal curve

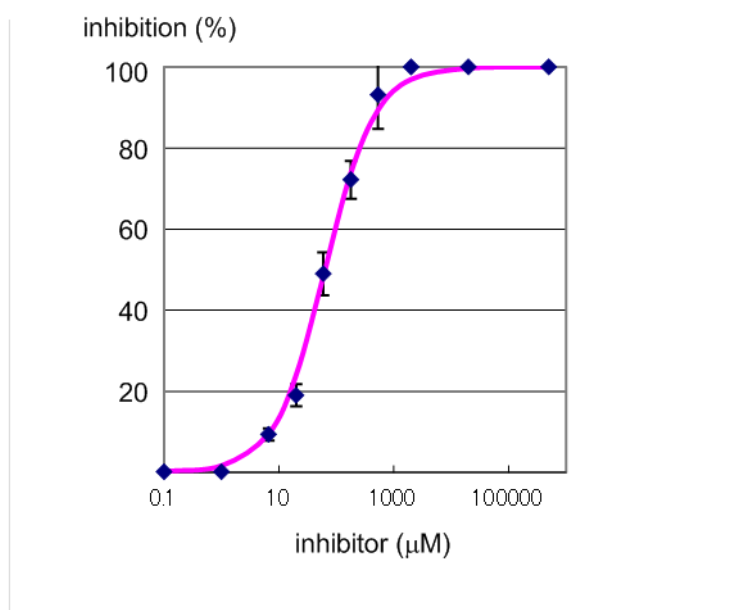

(13) Figure S-7: Possible interactions at the *N*-substituent

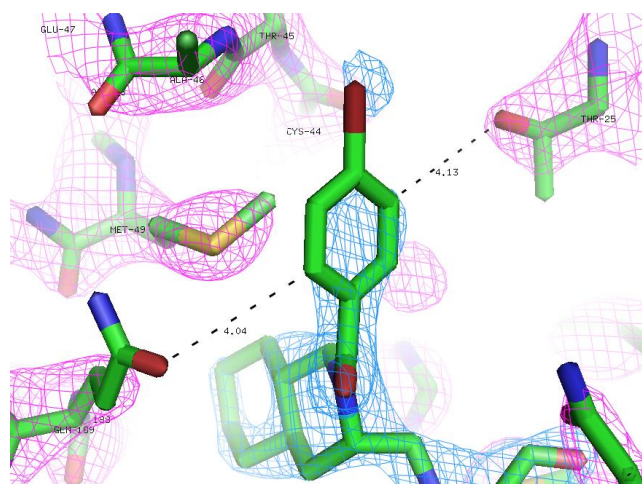

## (14) NMR data of synthesized compounds

(a) Compounds included in the manuscript

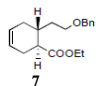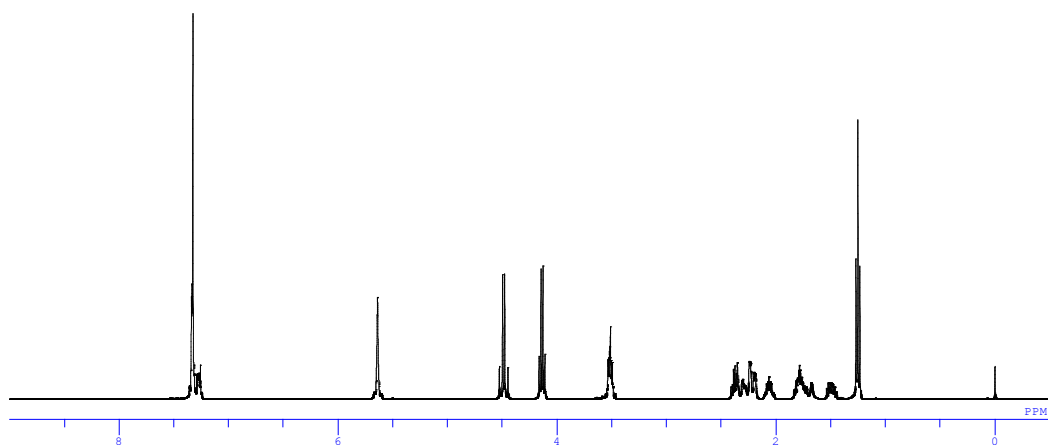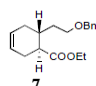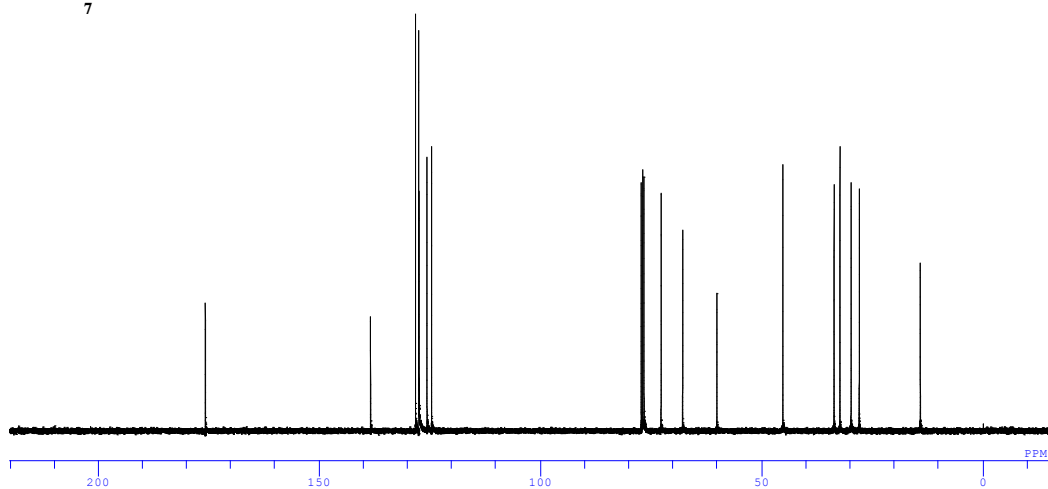

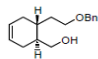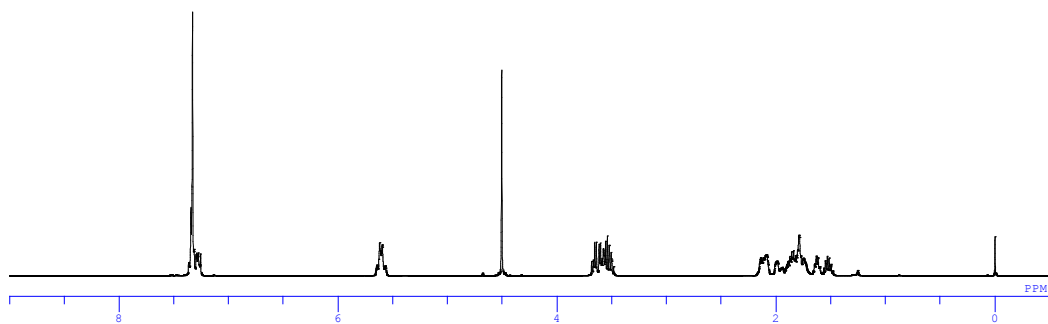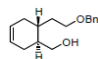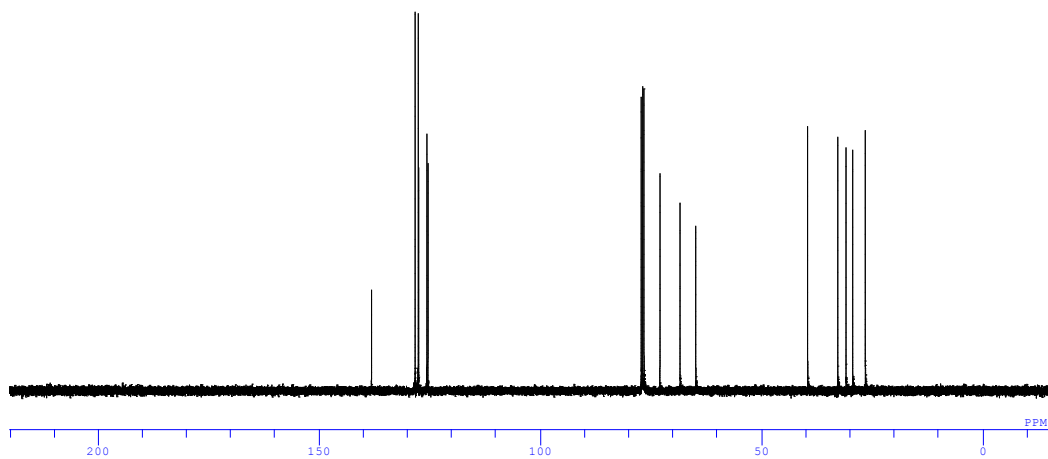

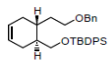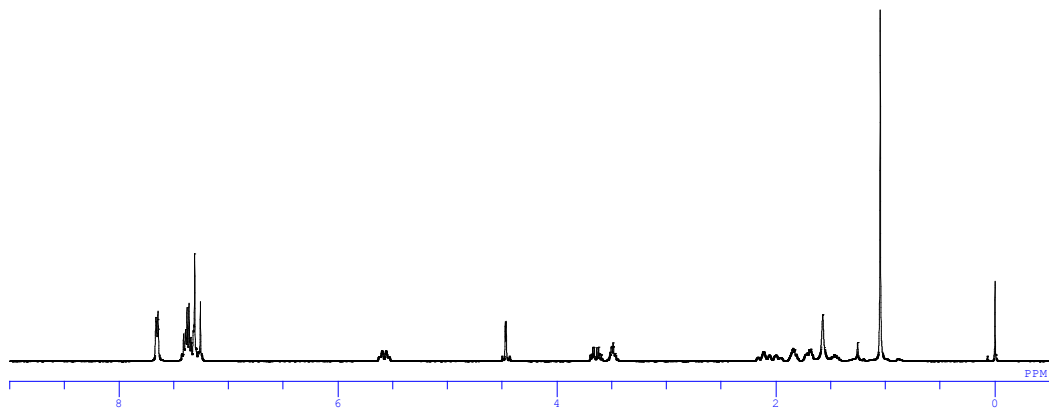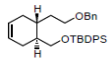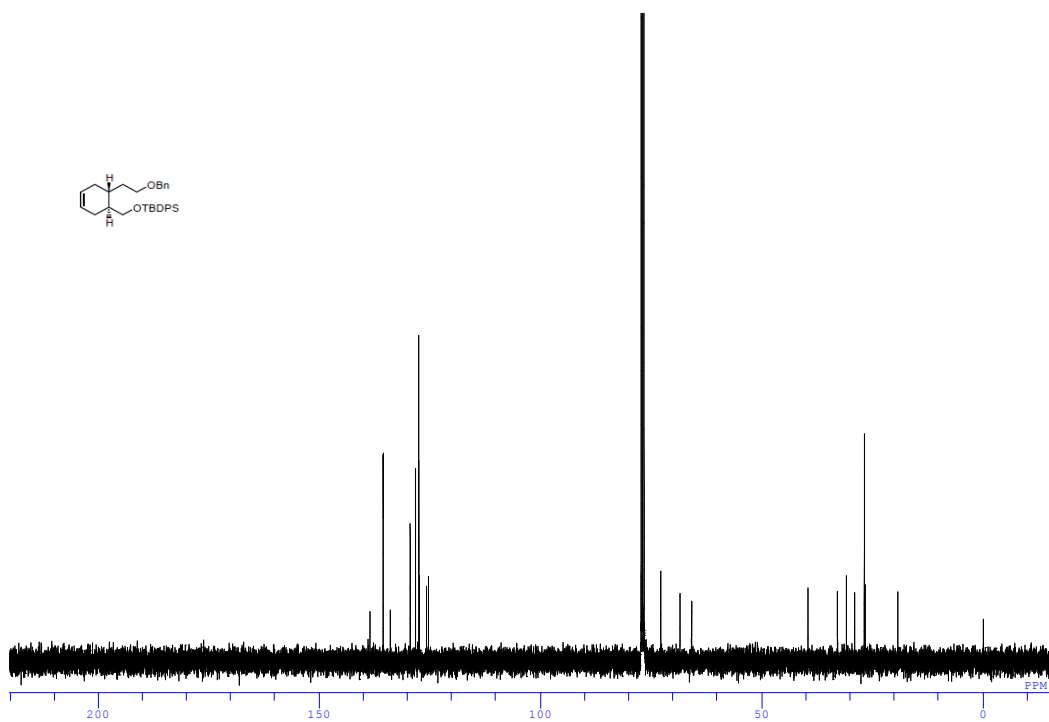

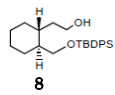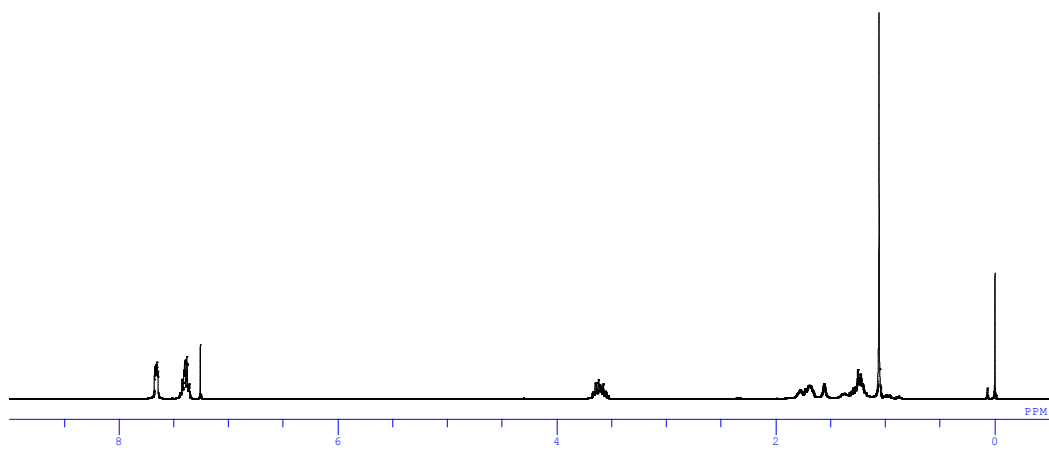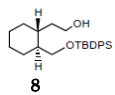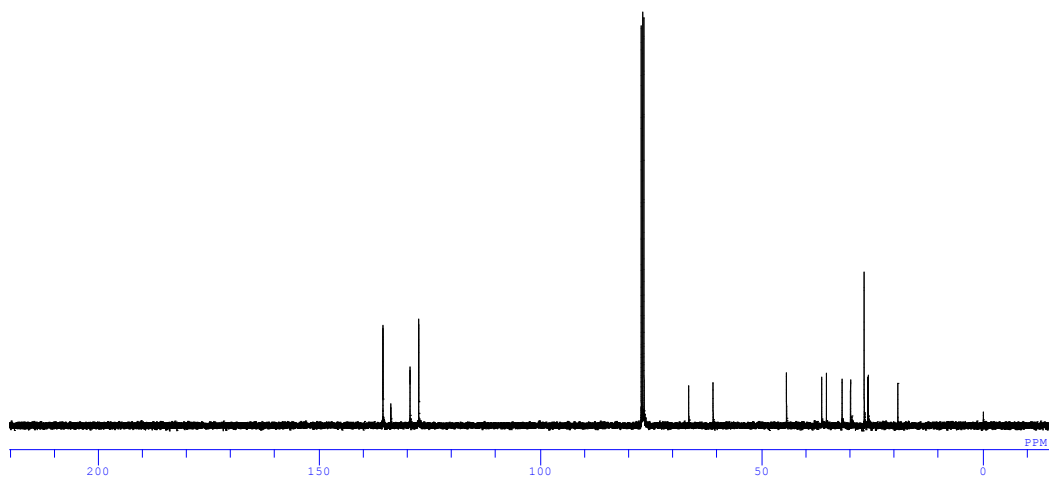

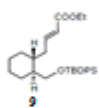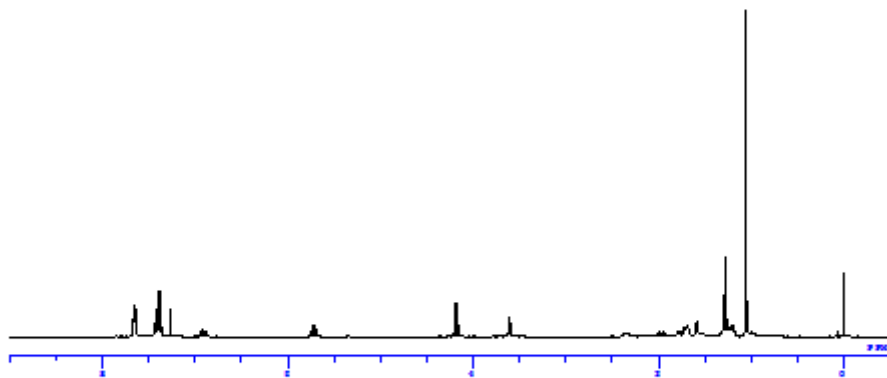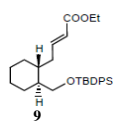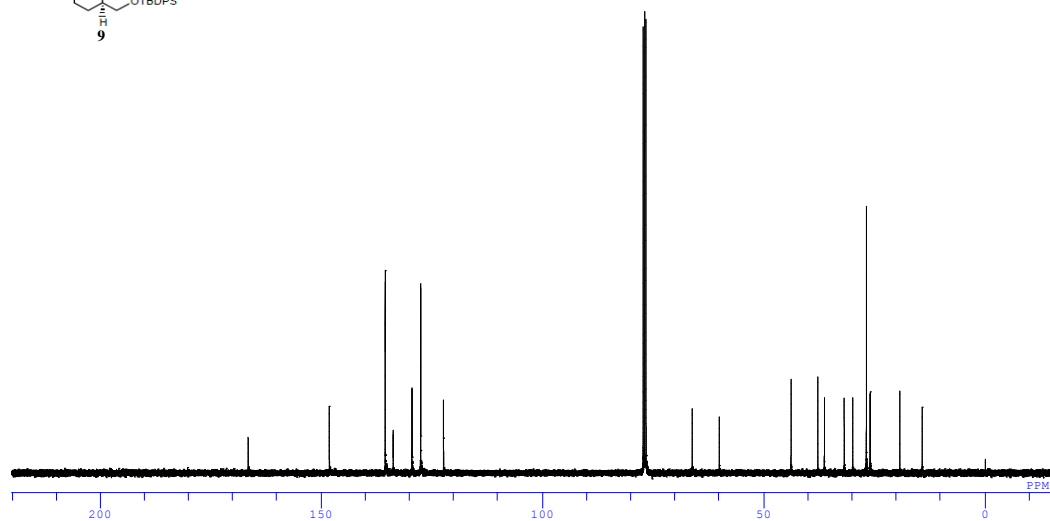

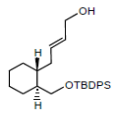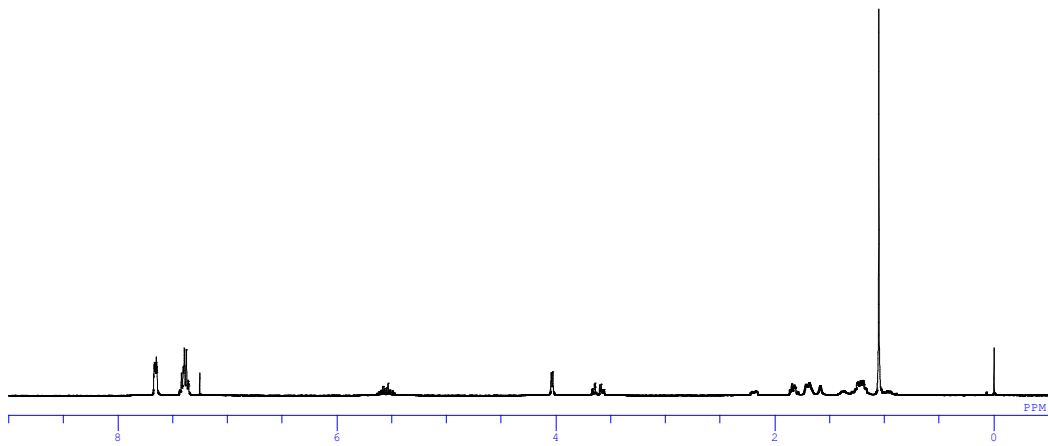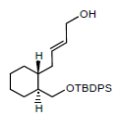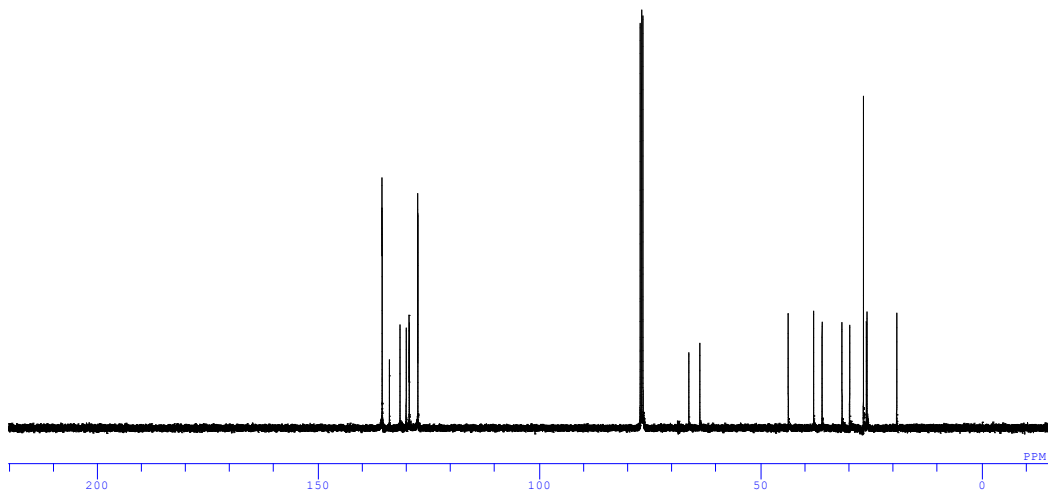



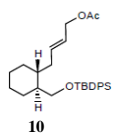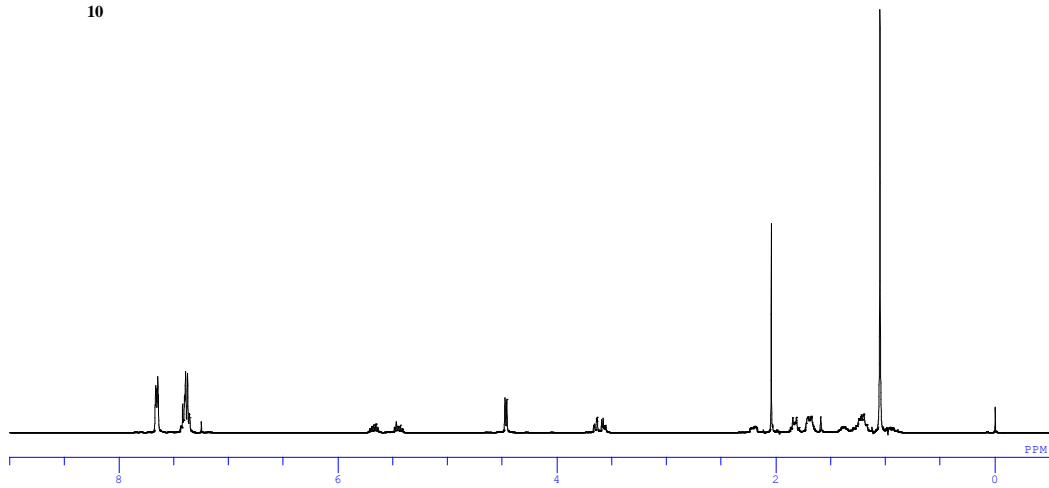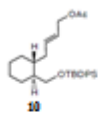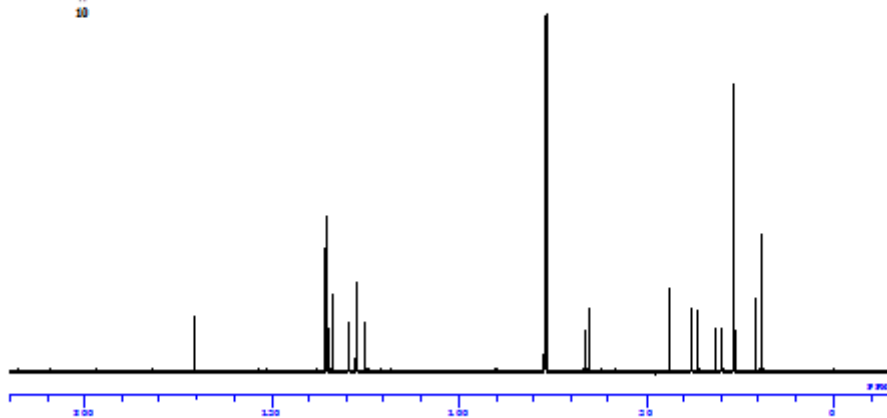

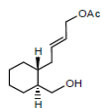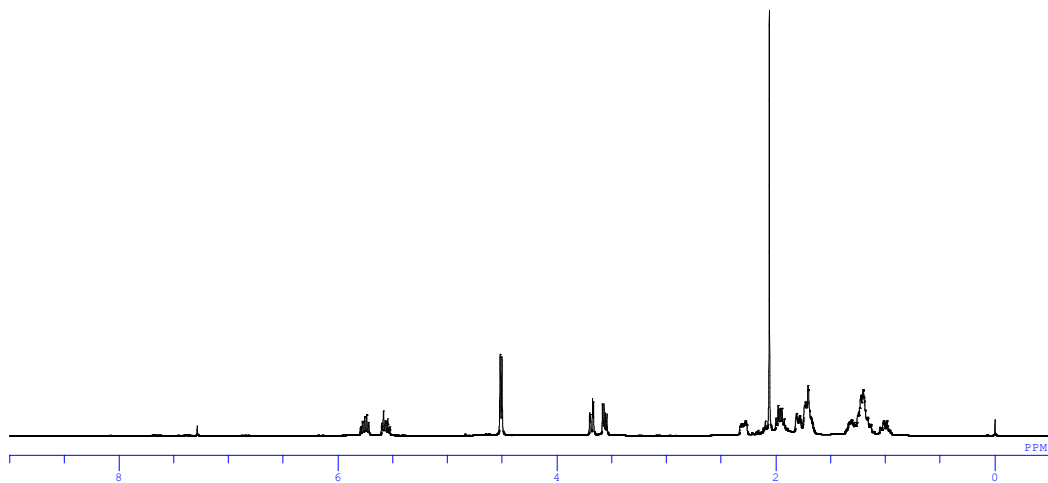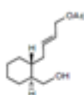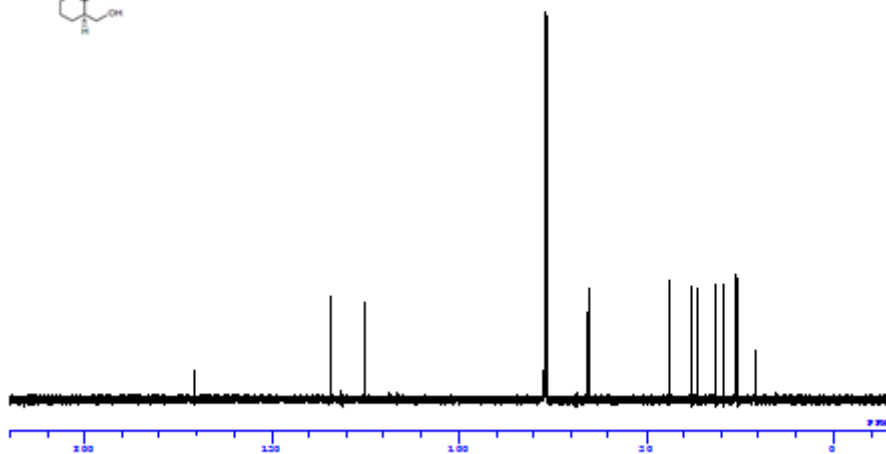

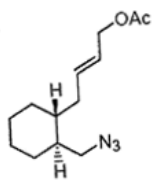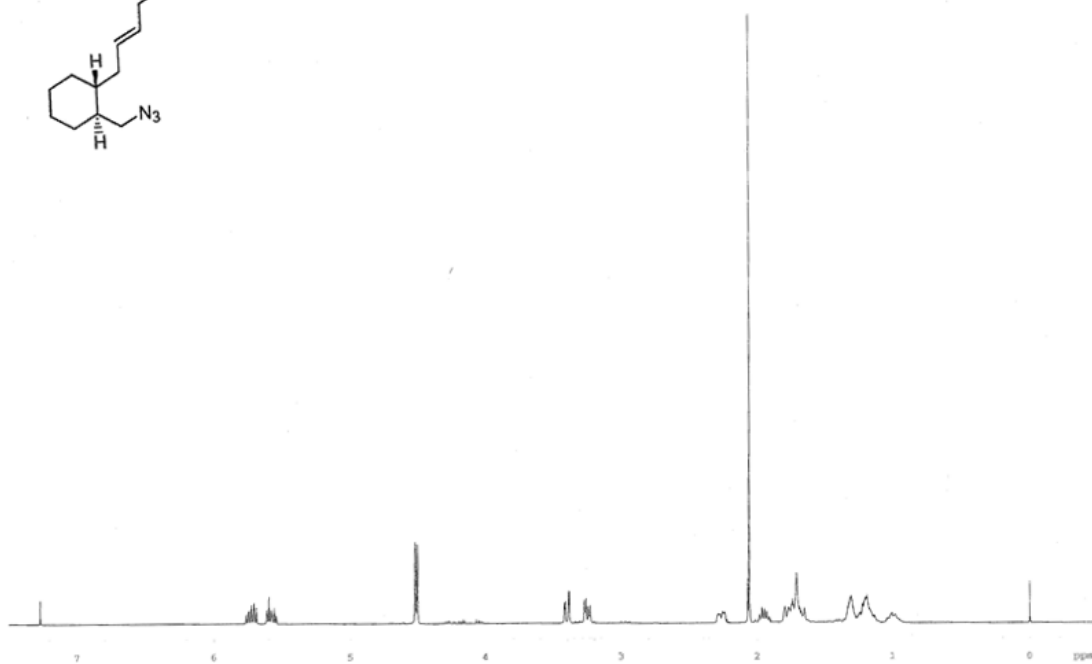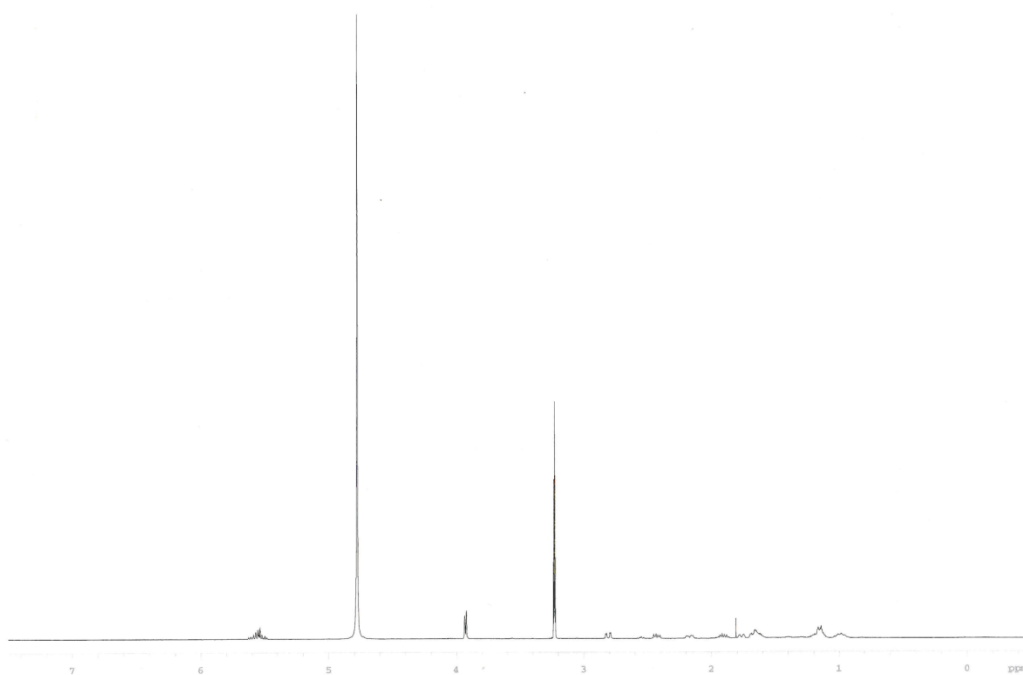

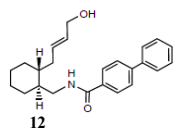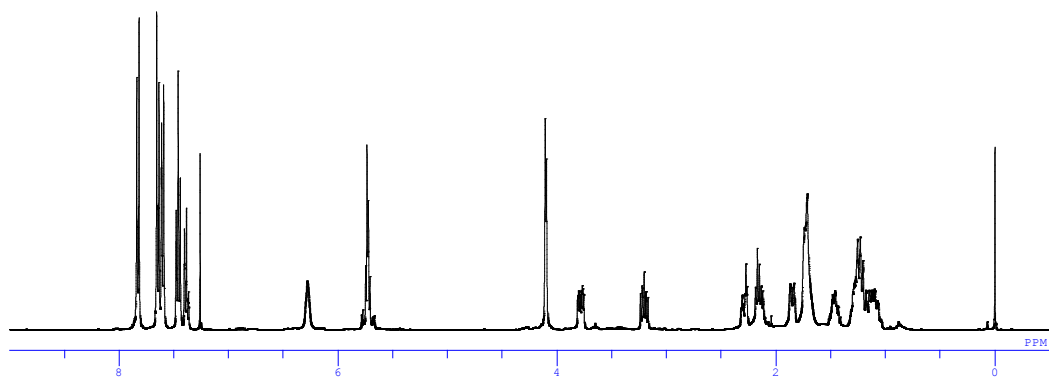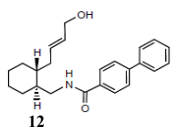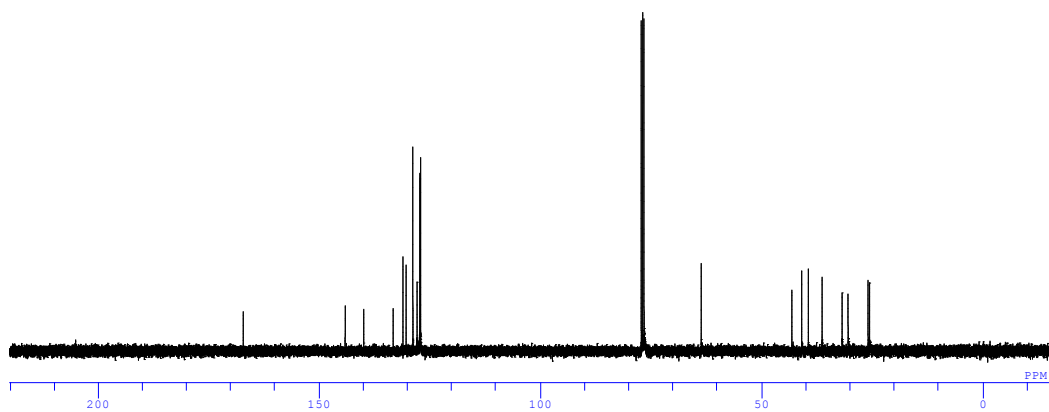

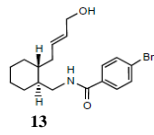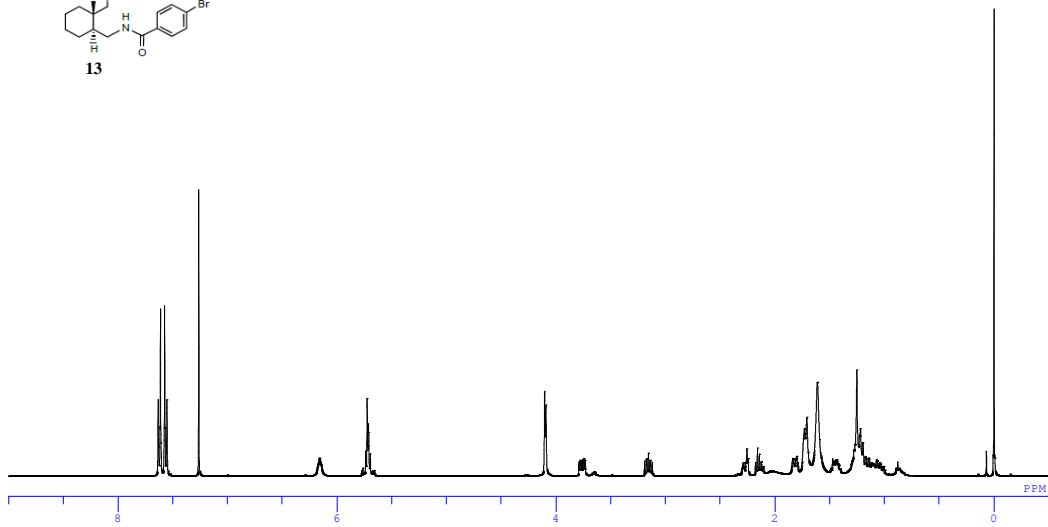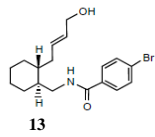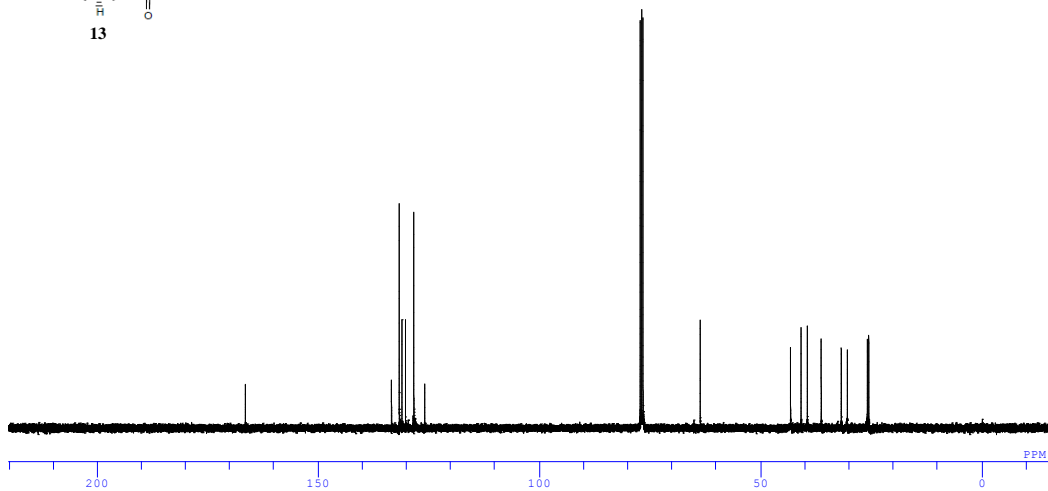

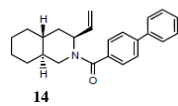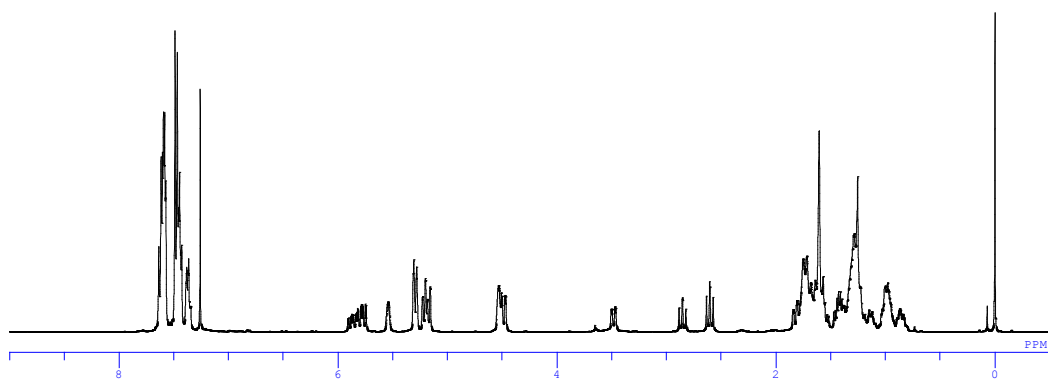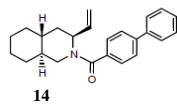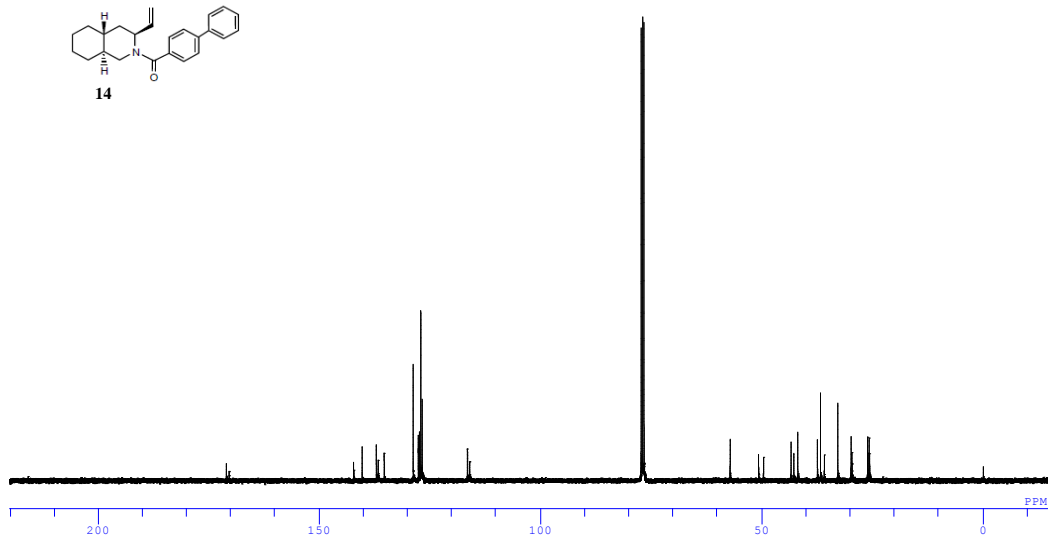

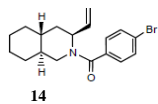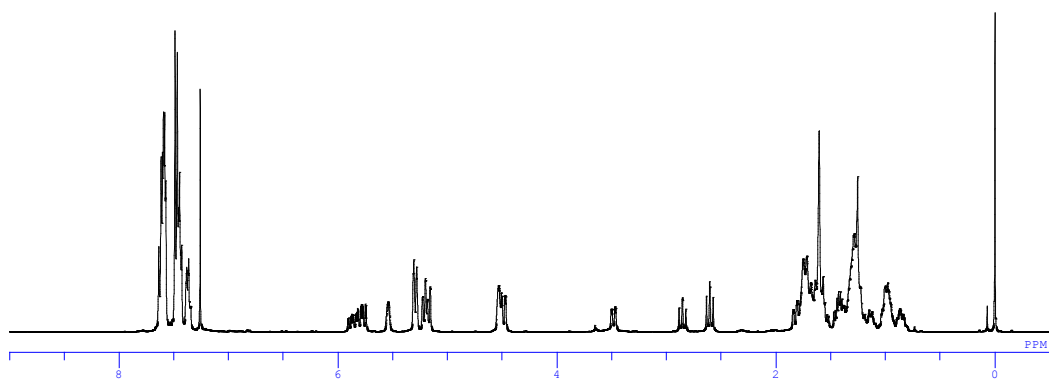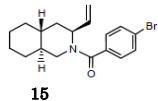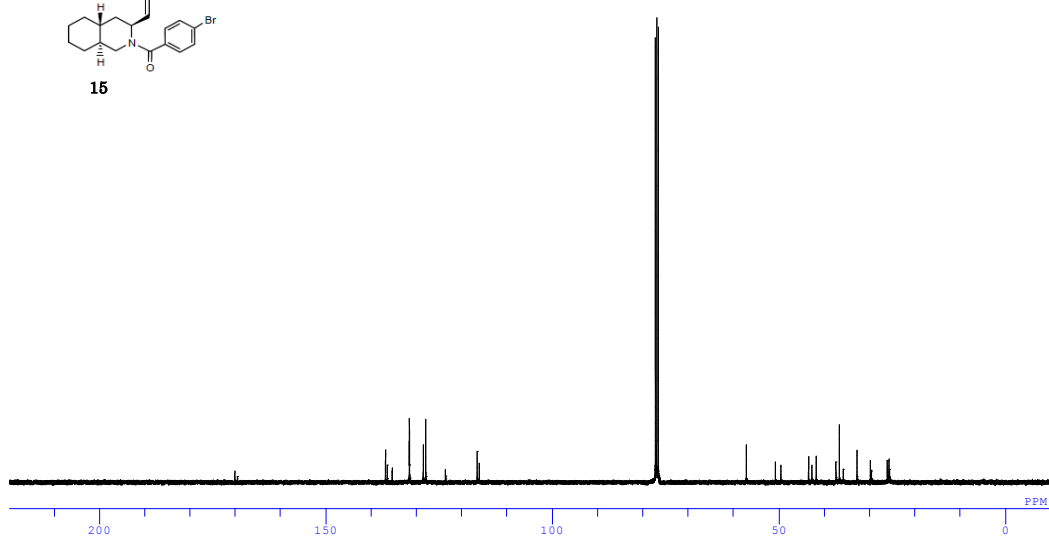

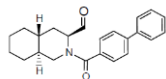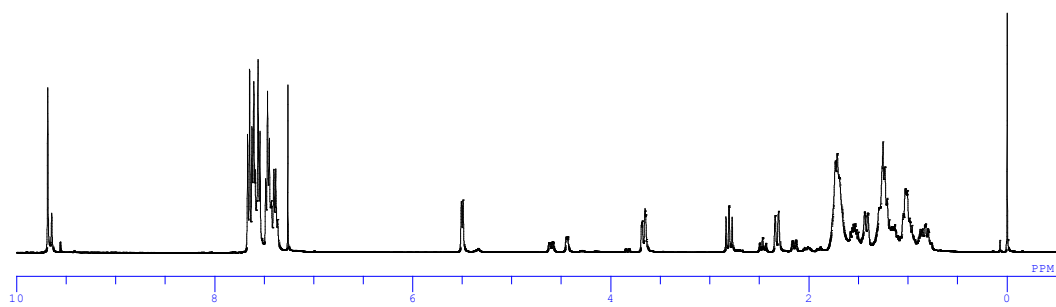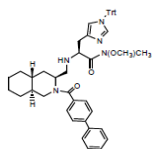

18

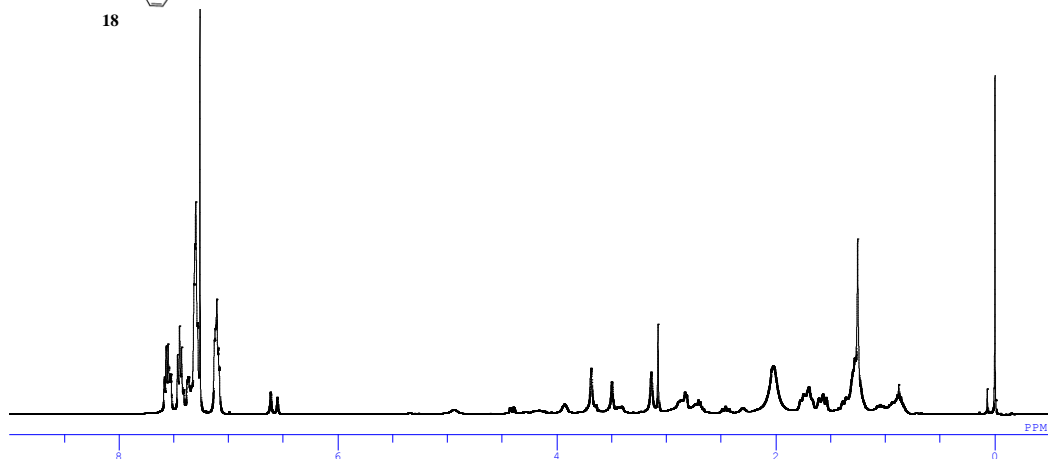



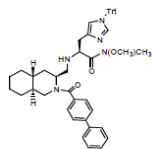

18

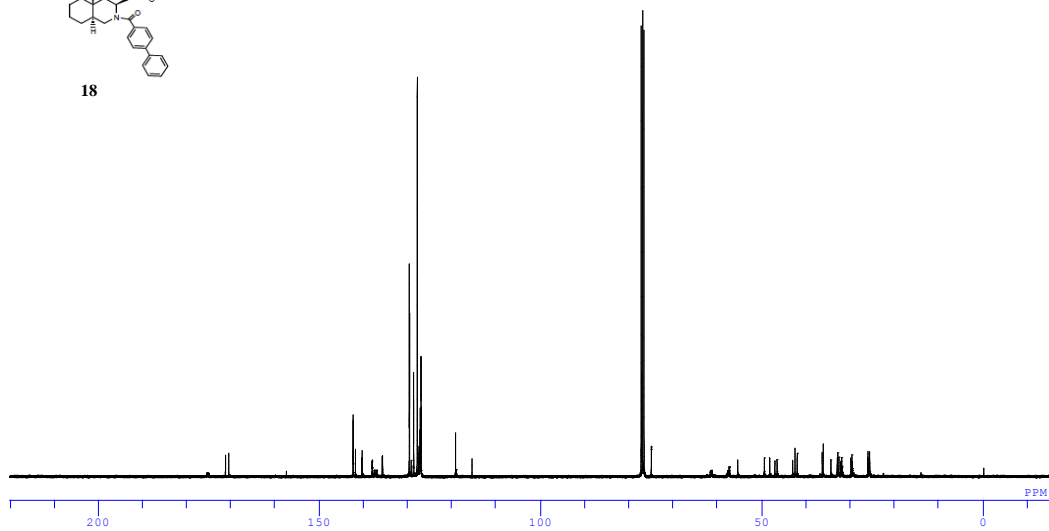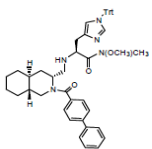

20

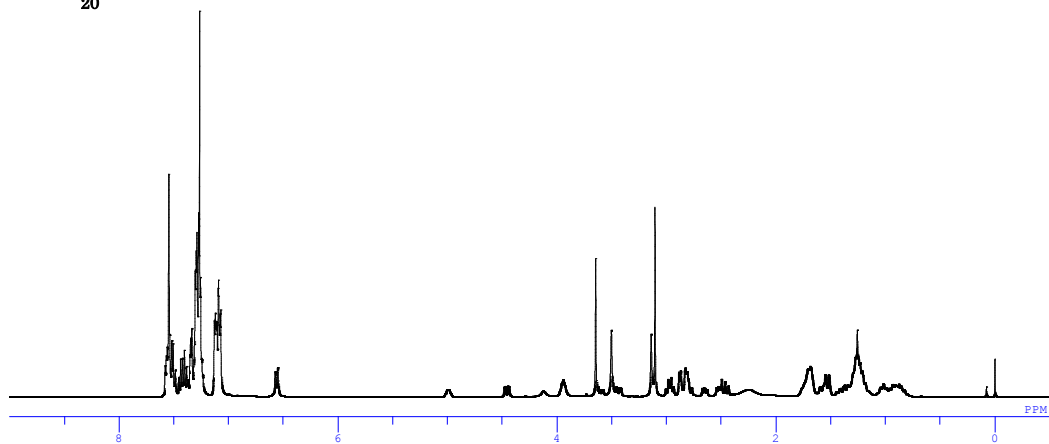

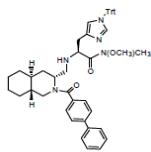

20

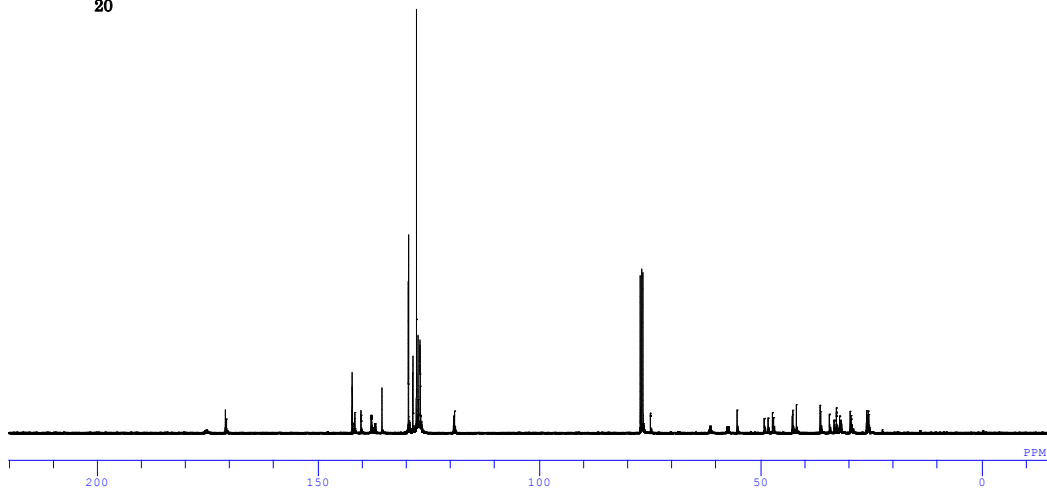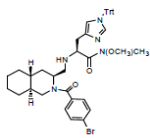

19

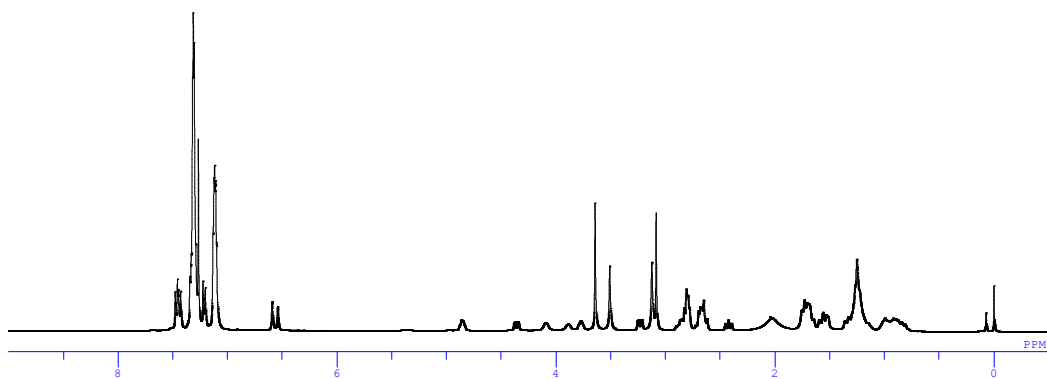

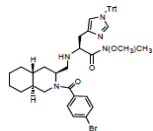

19

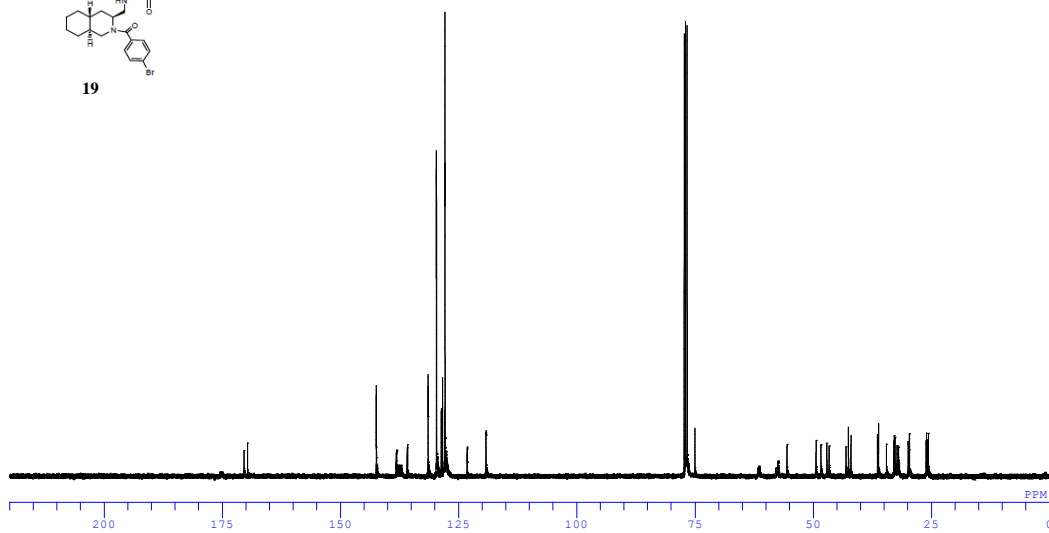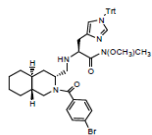

21

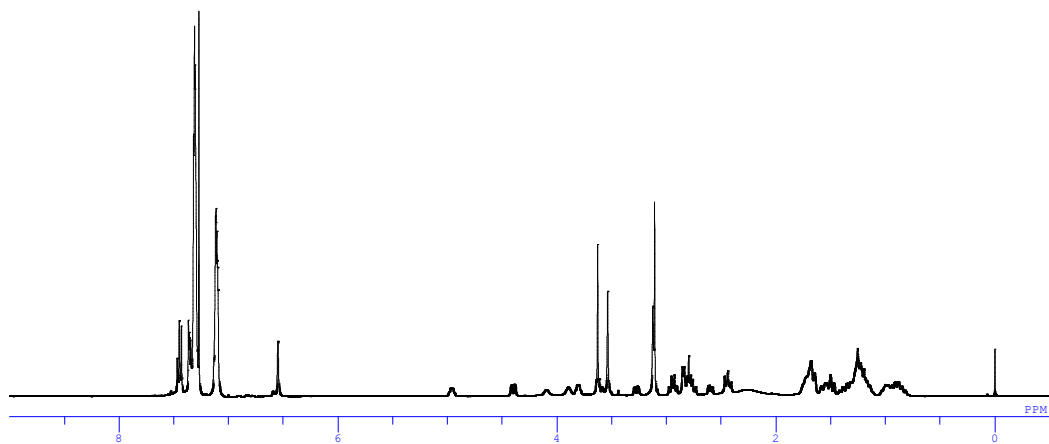

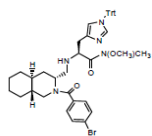

21

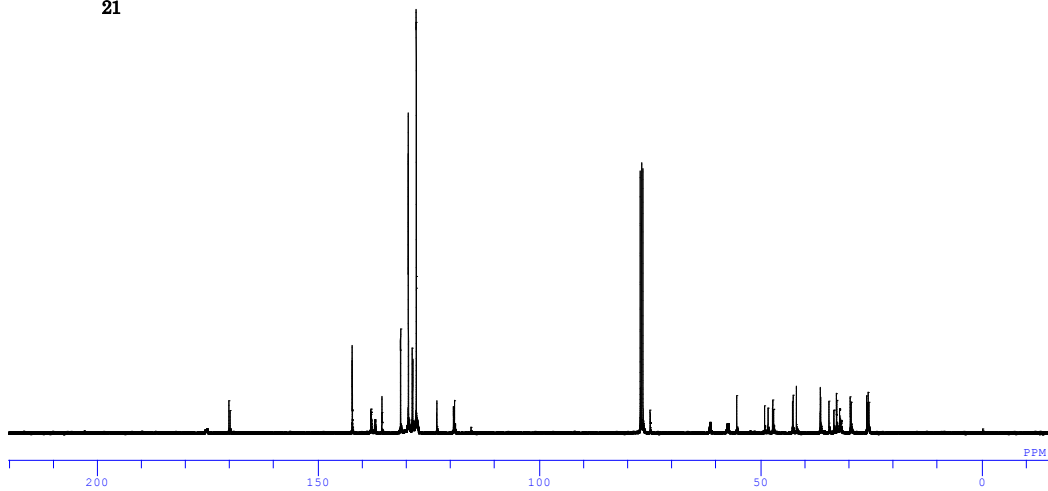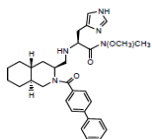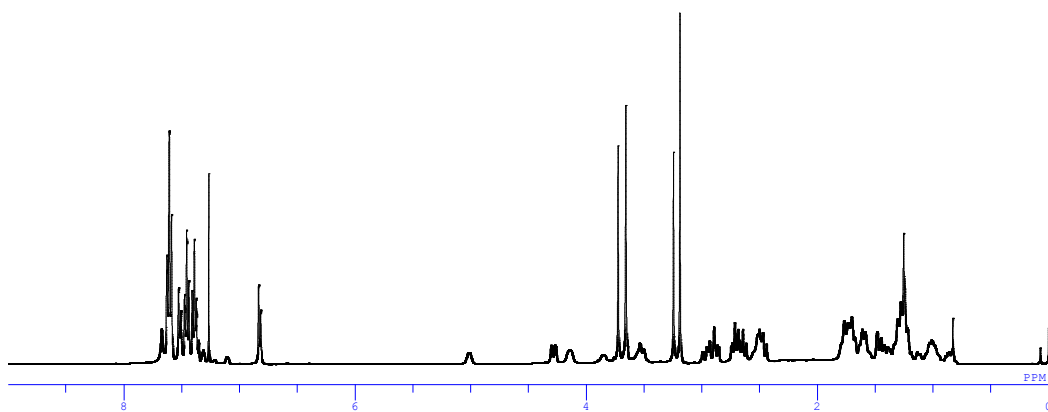

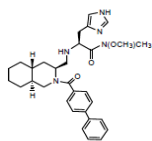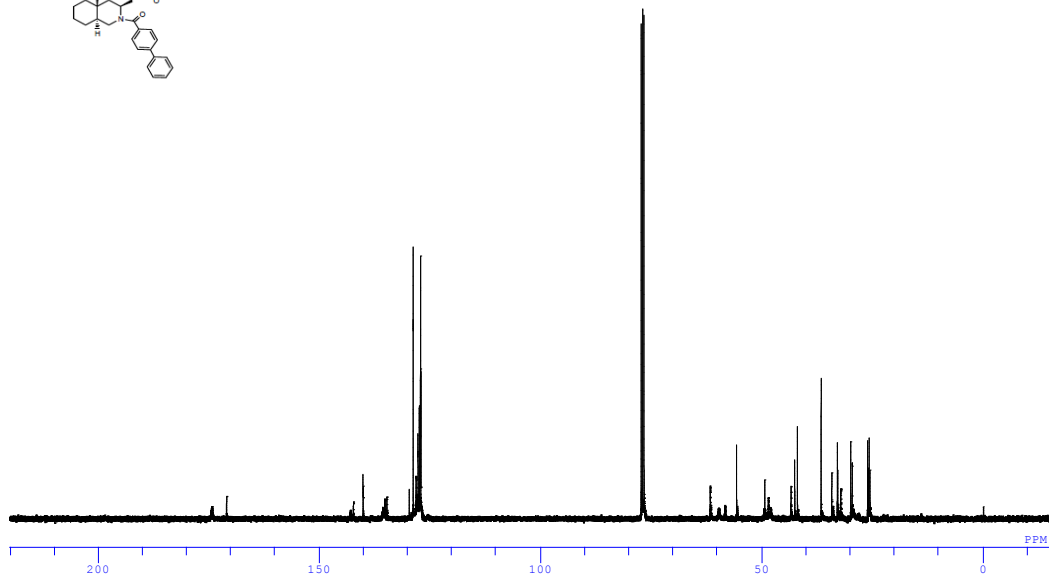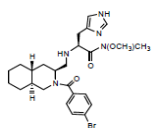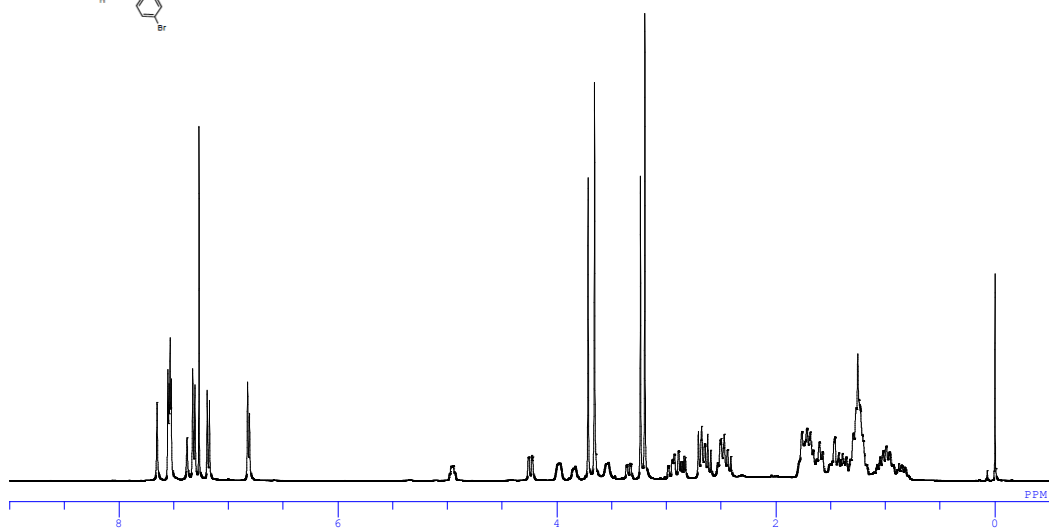

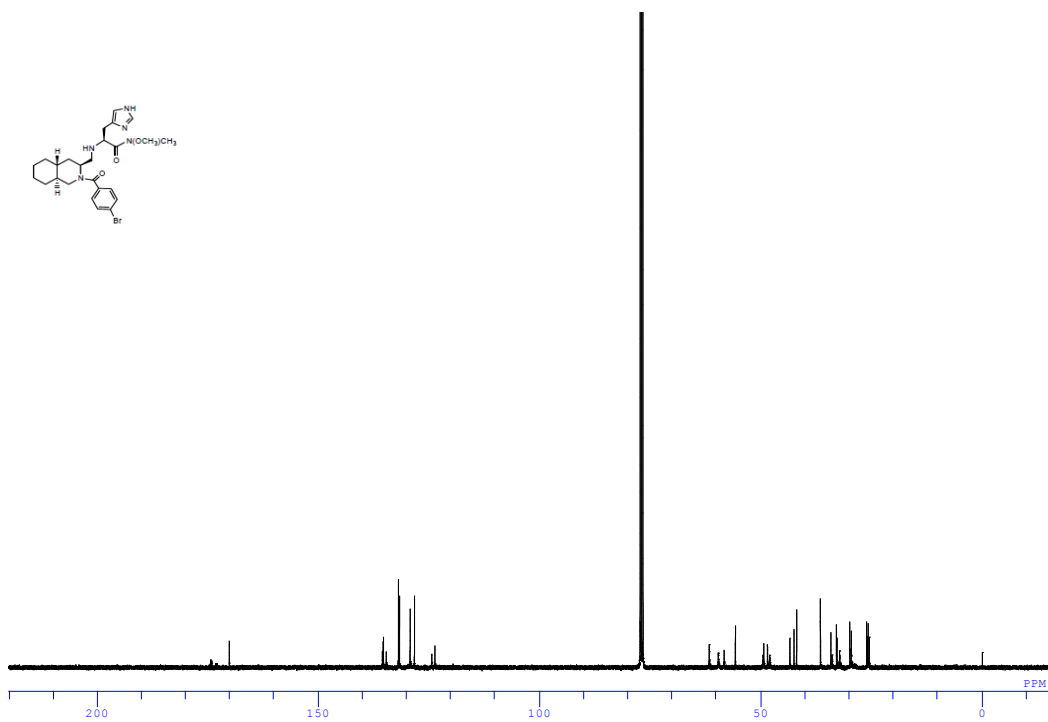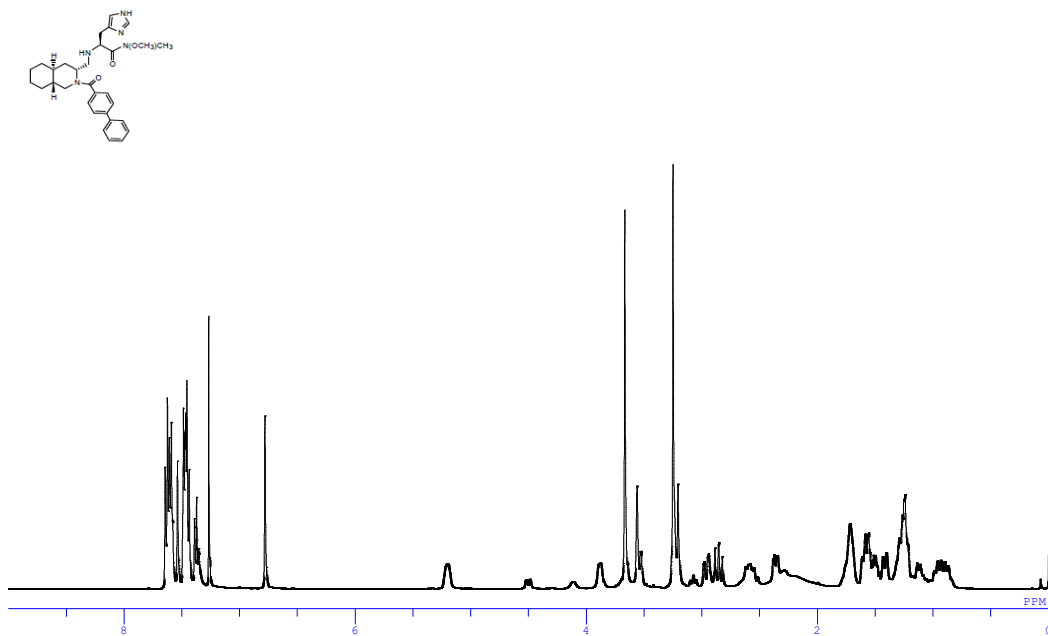

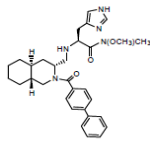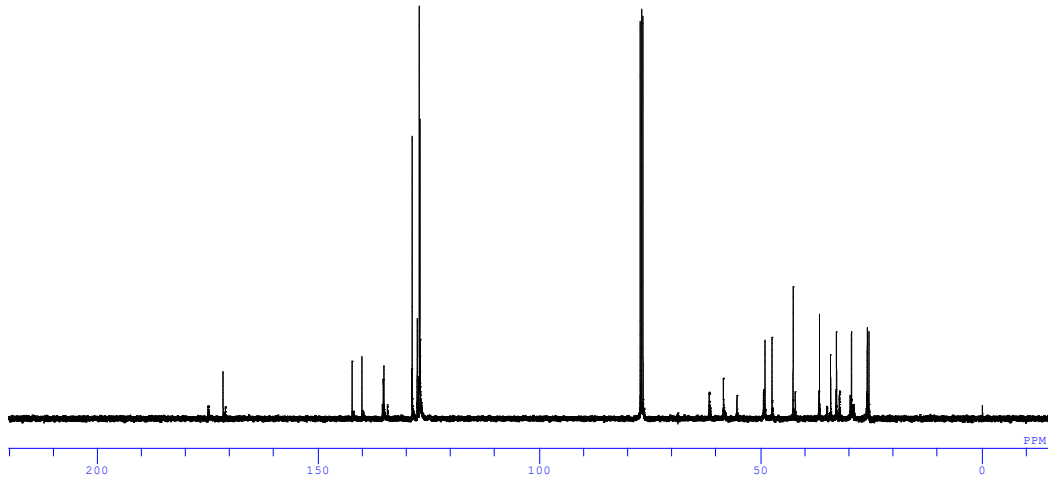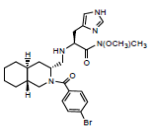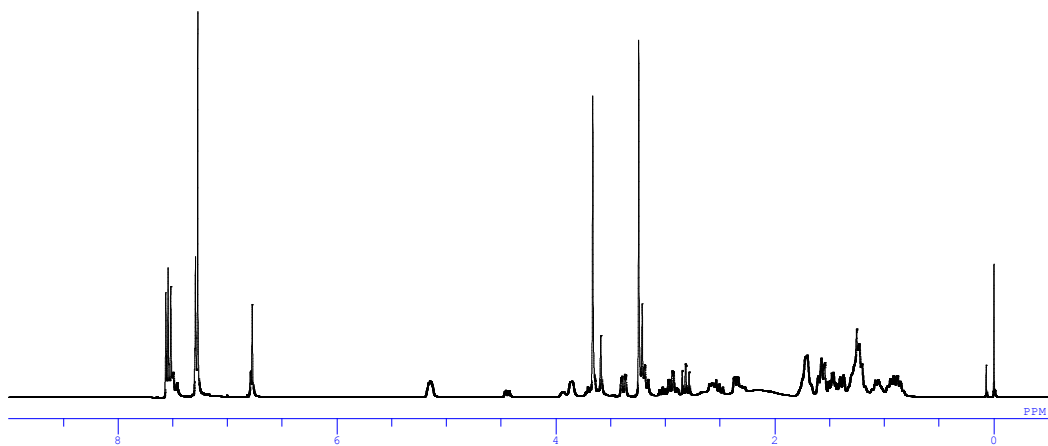

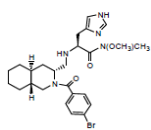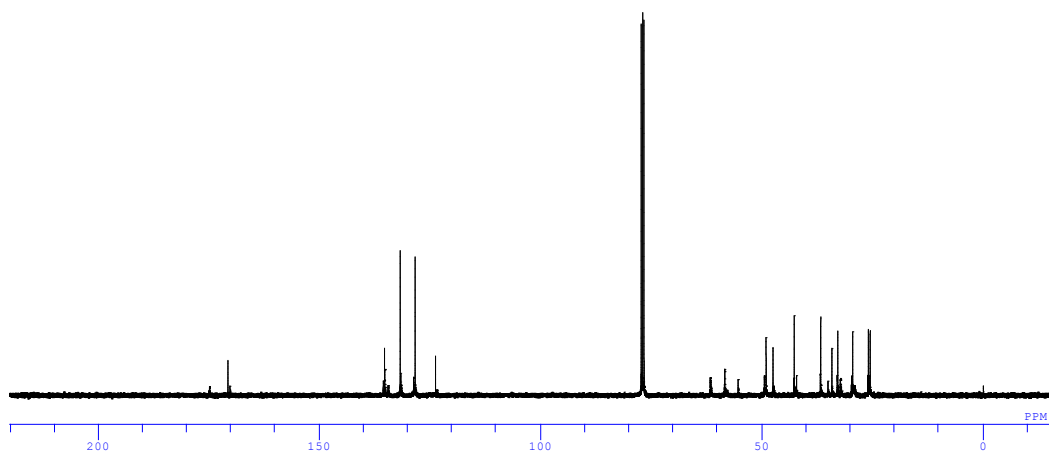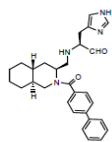

22

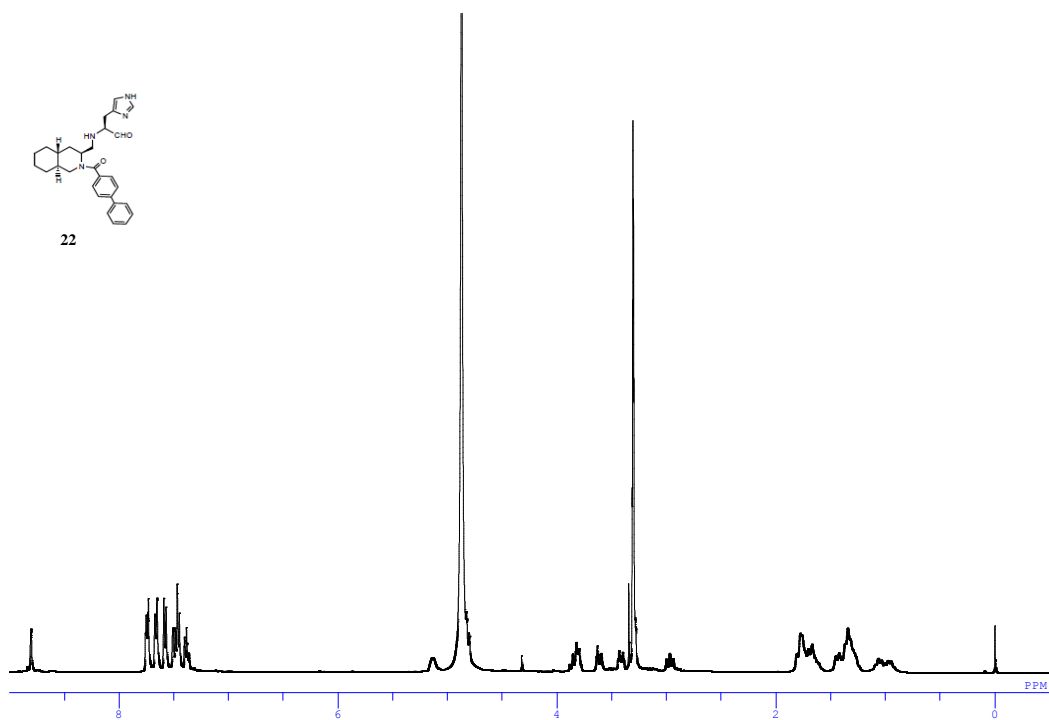



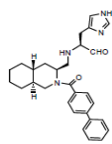

22

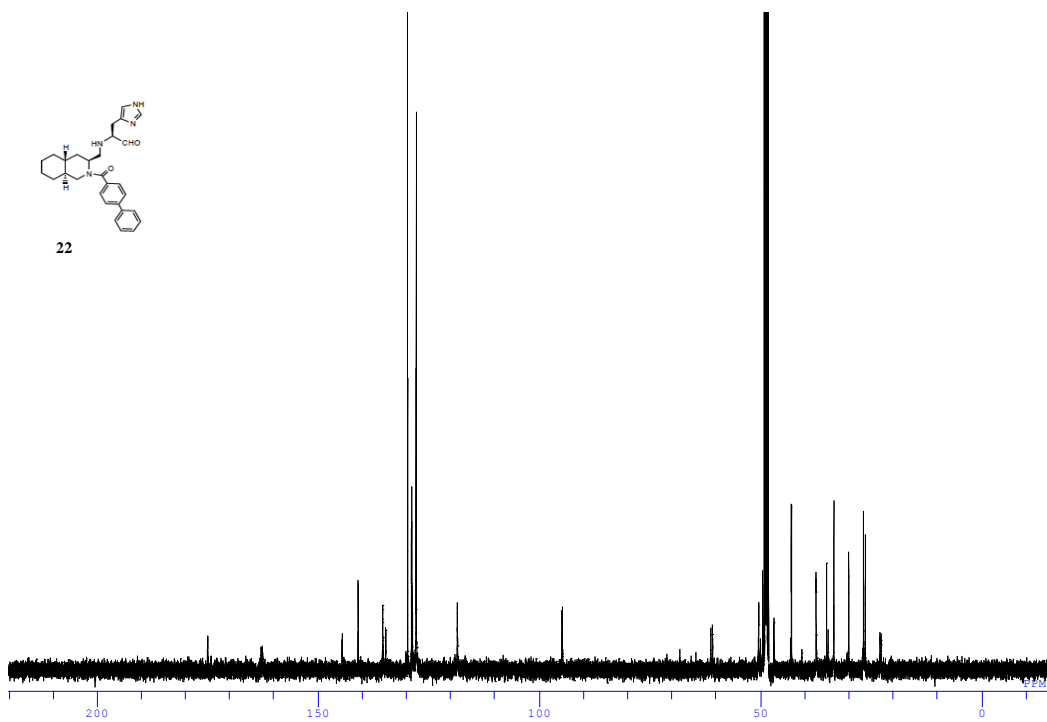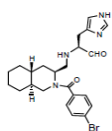

23

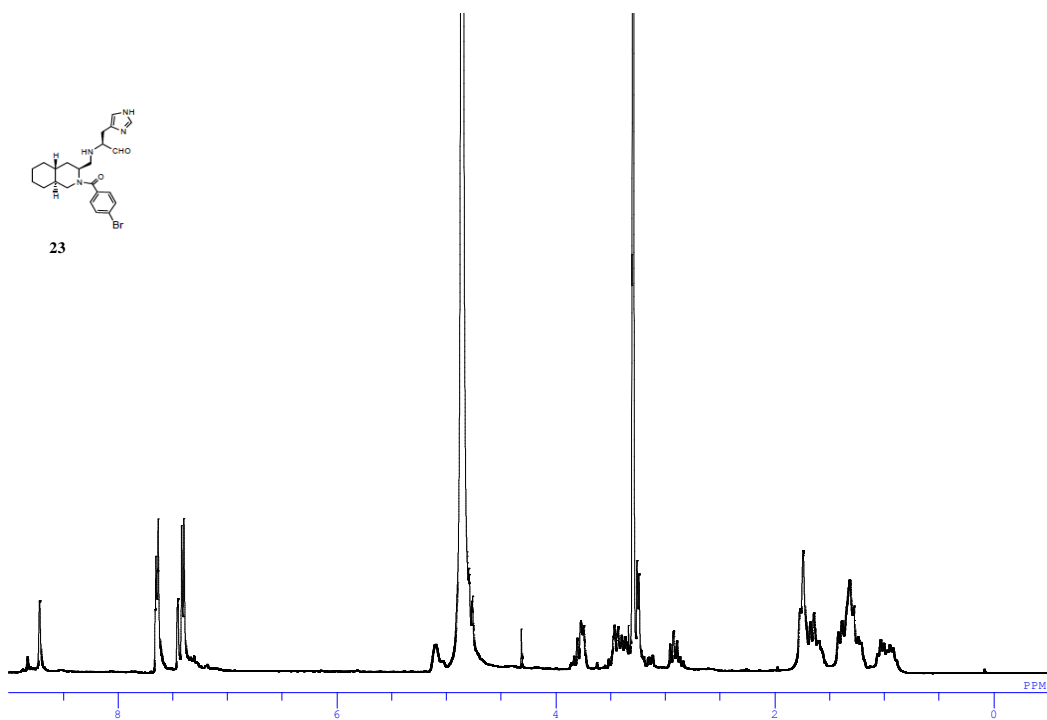

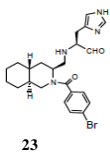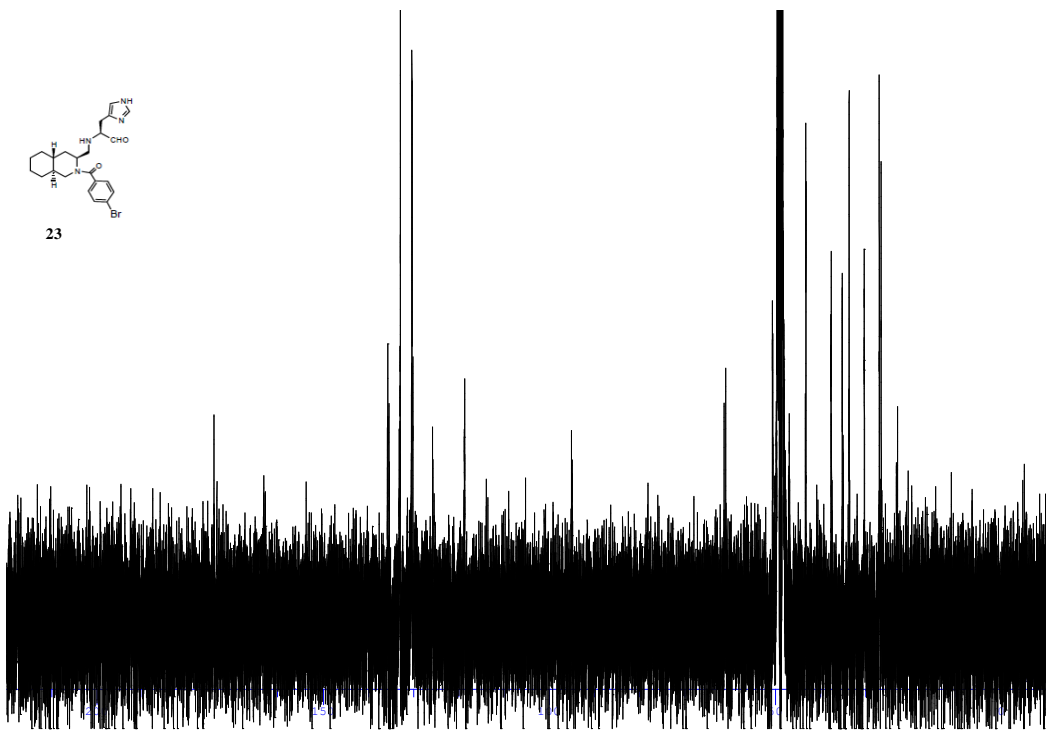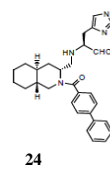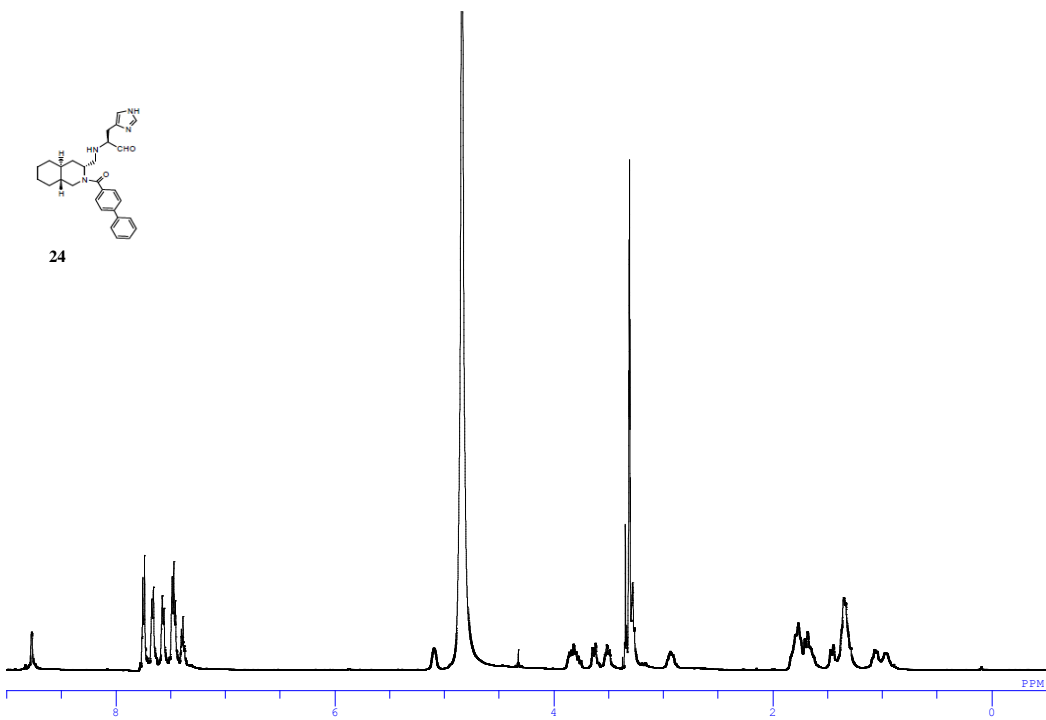

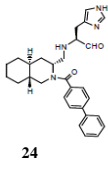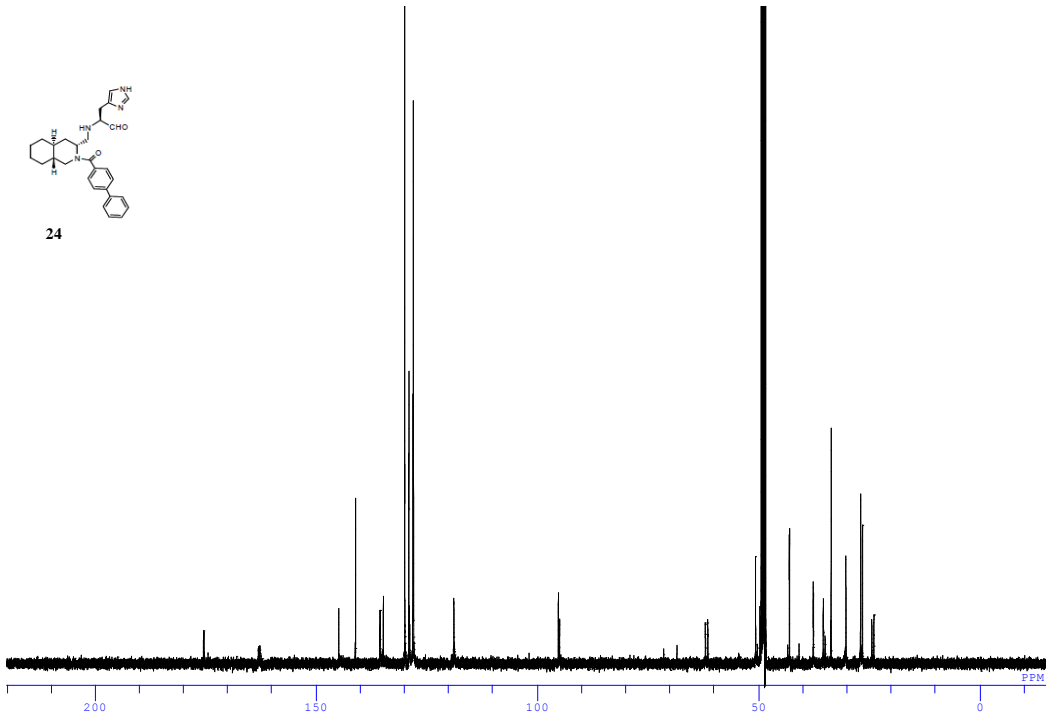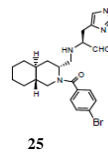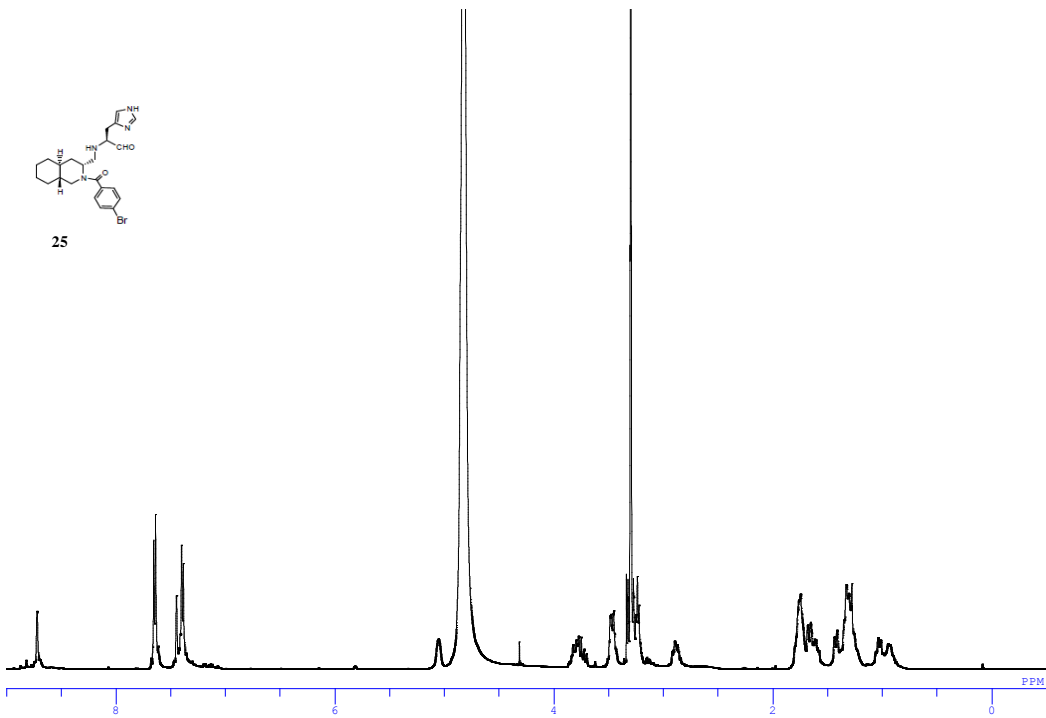

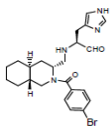

25

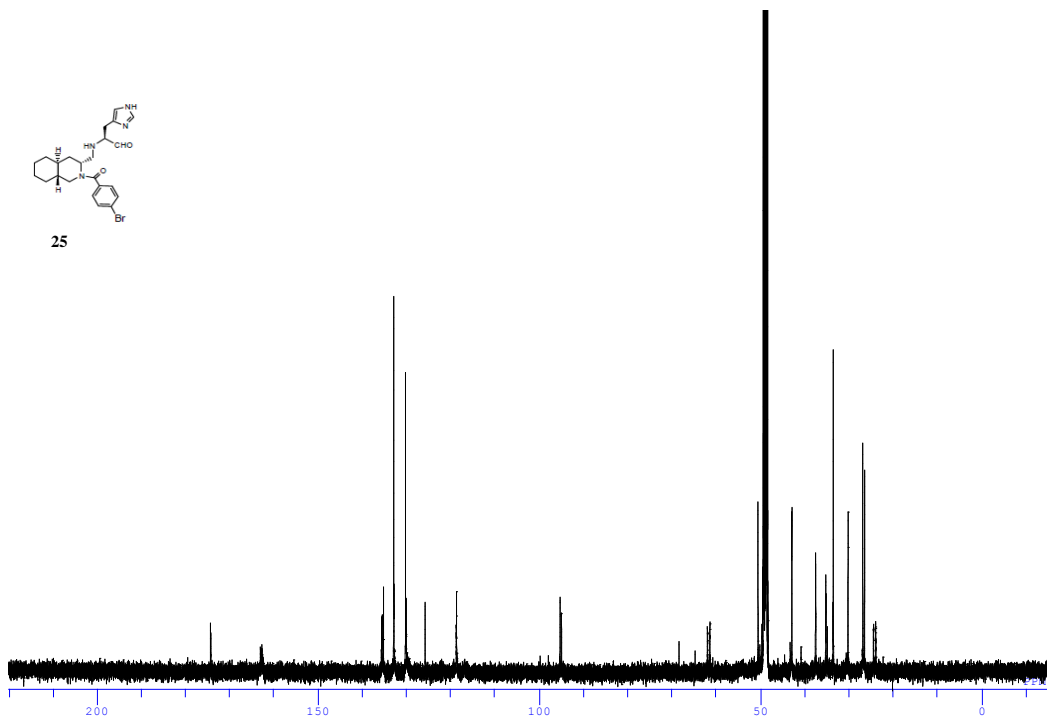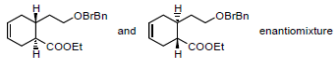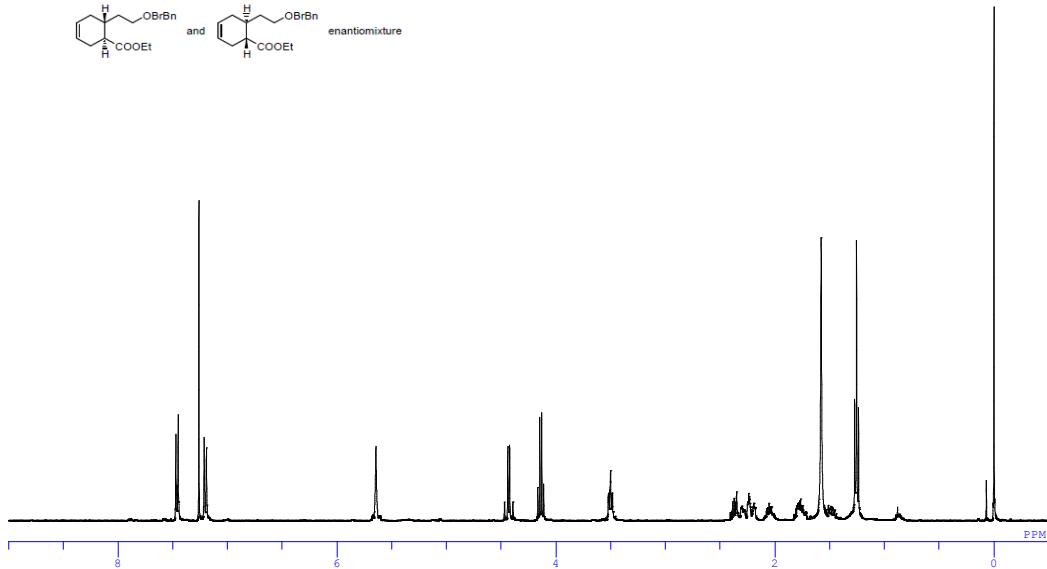

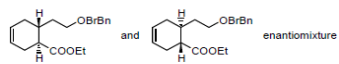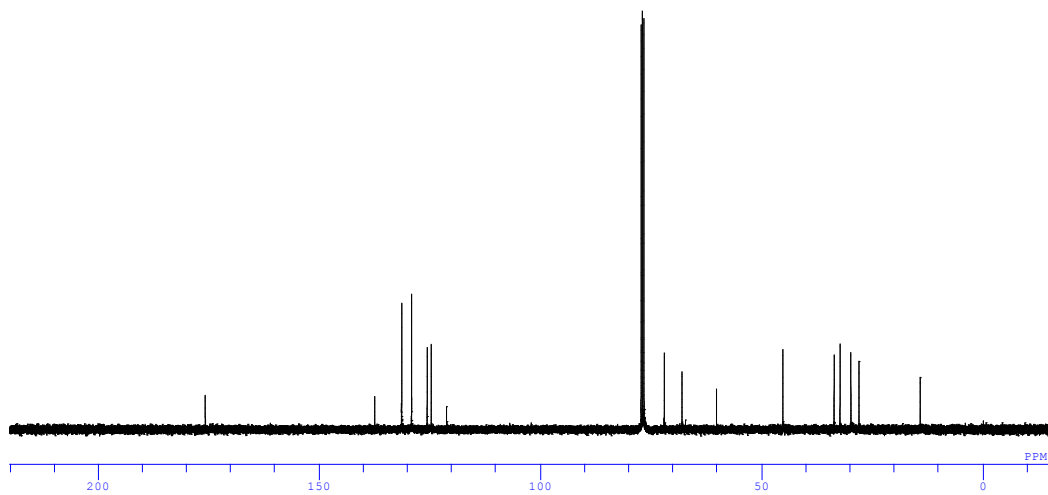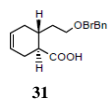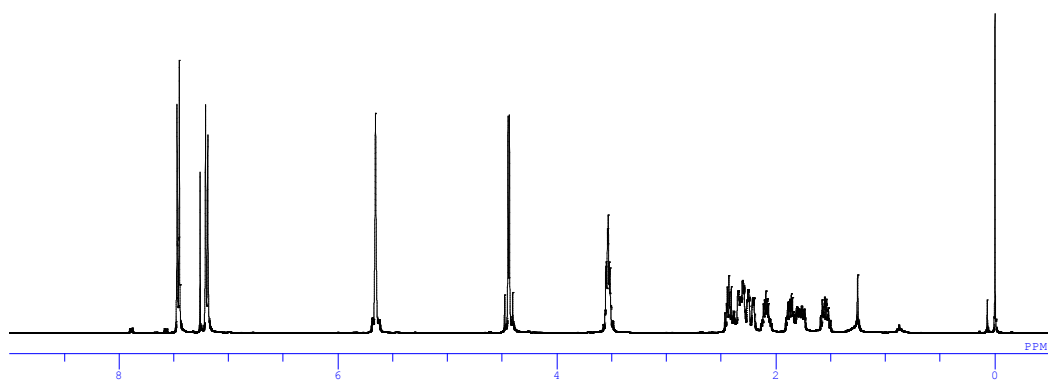

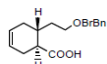

31

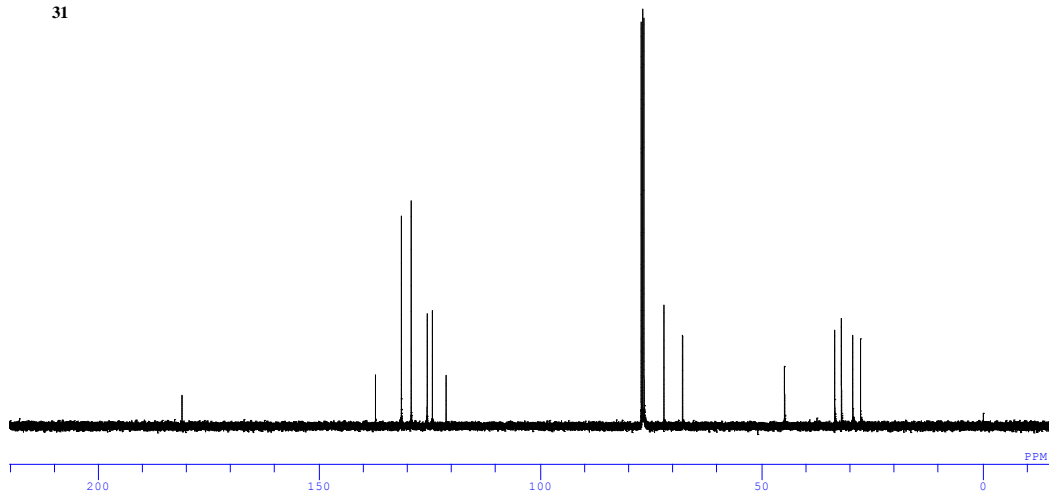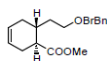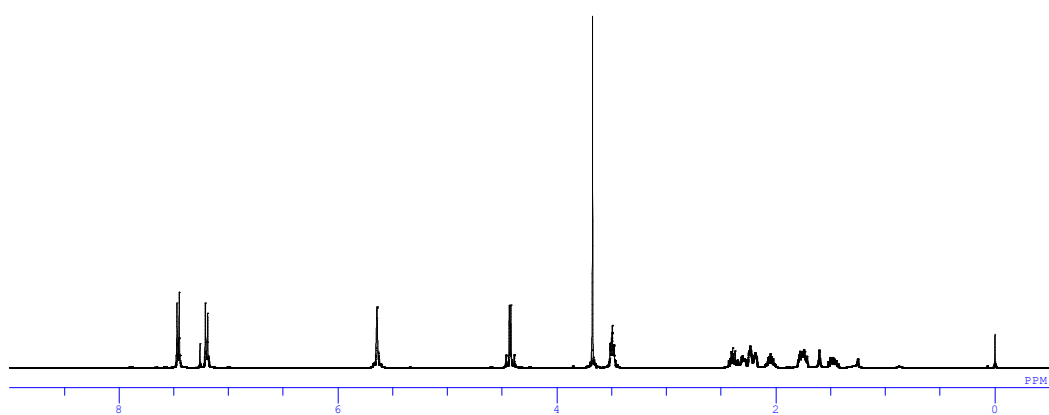

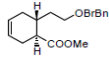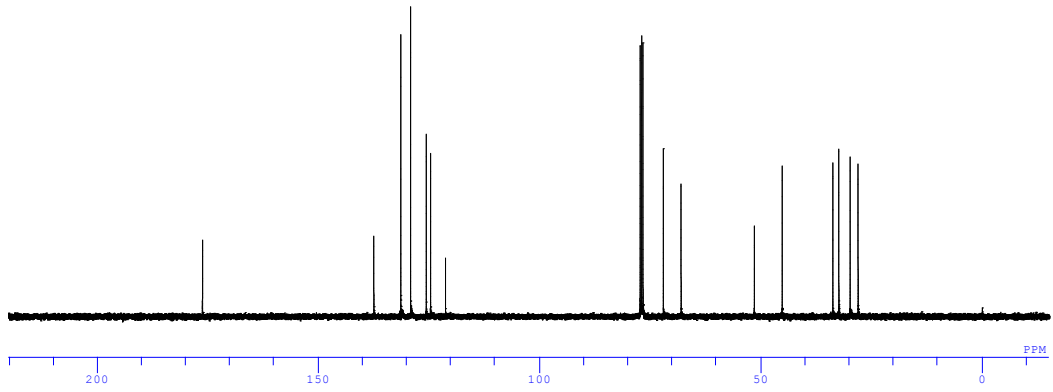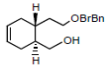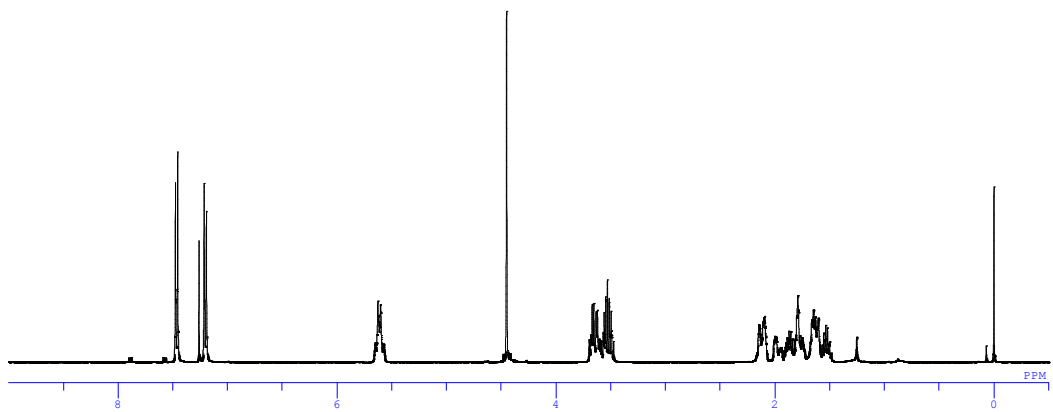

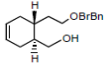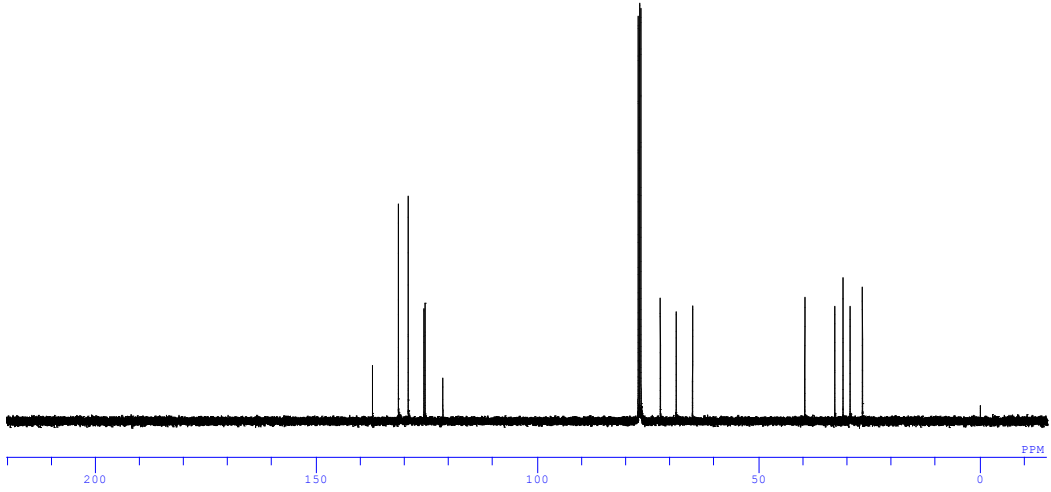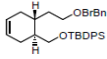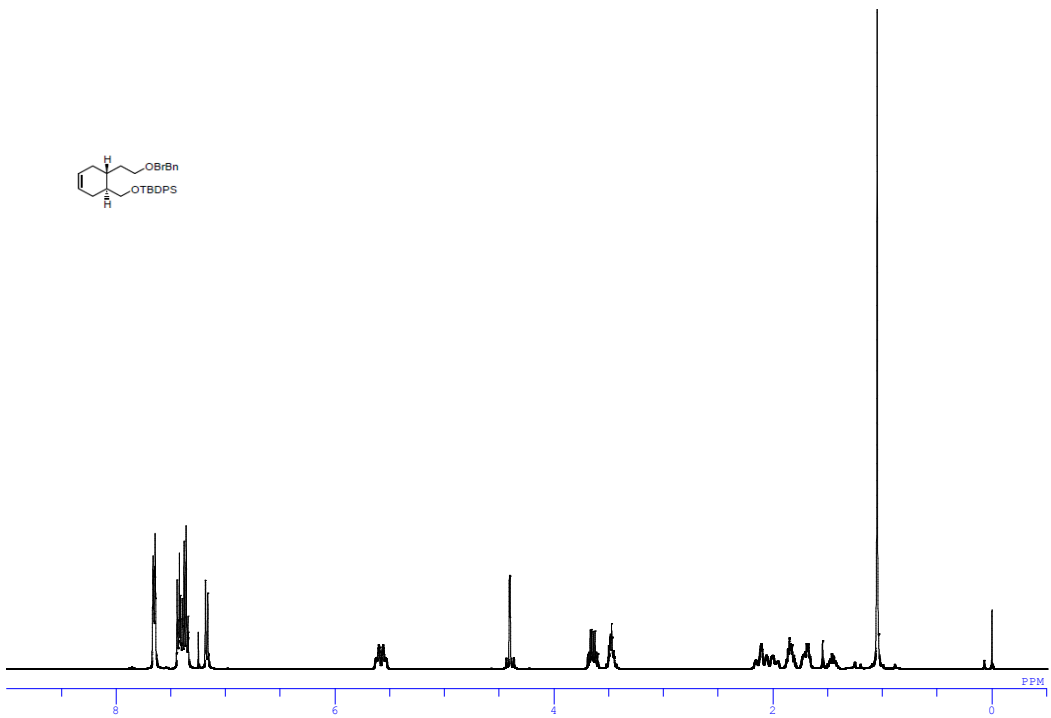



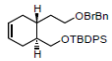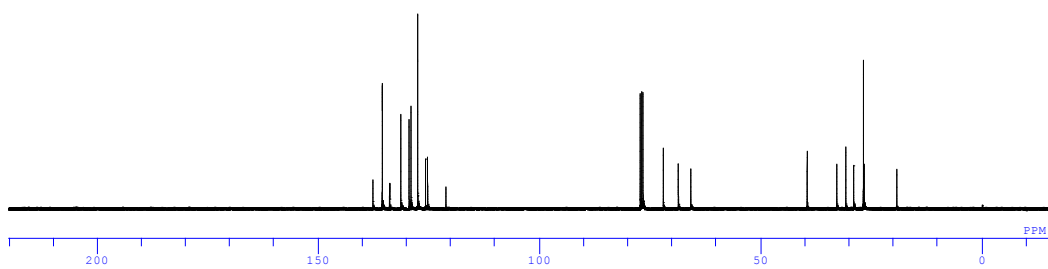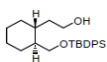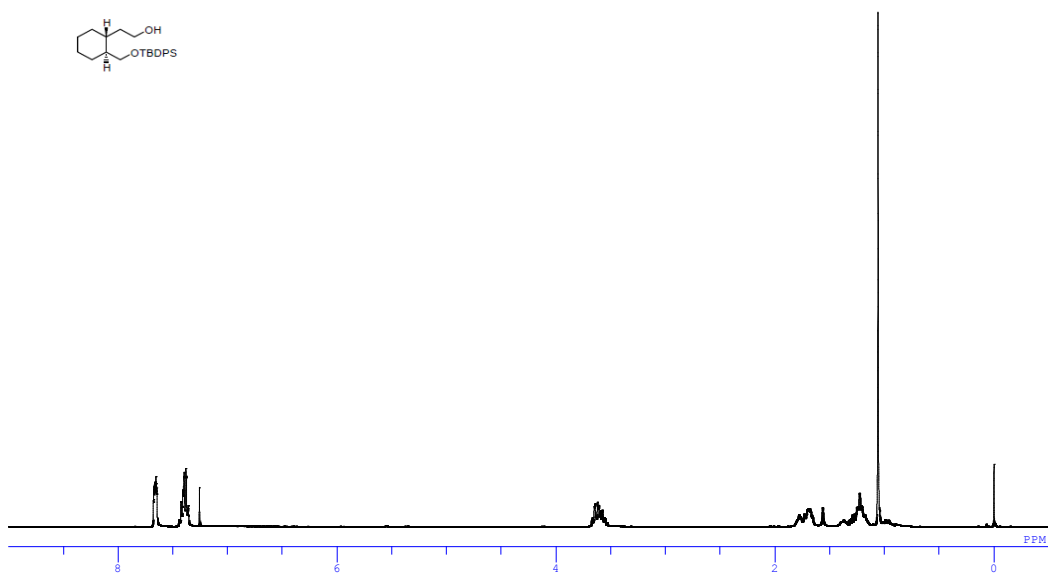

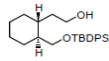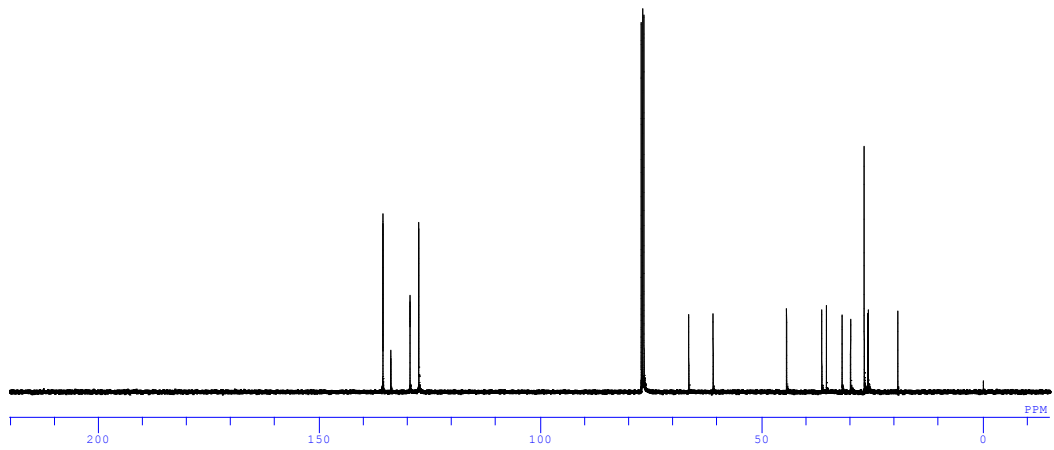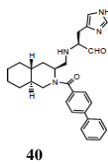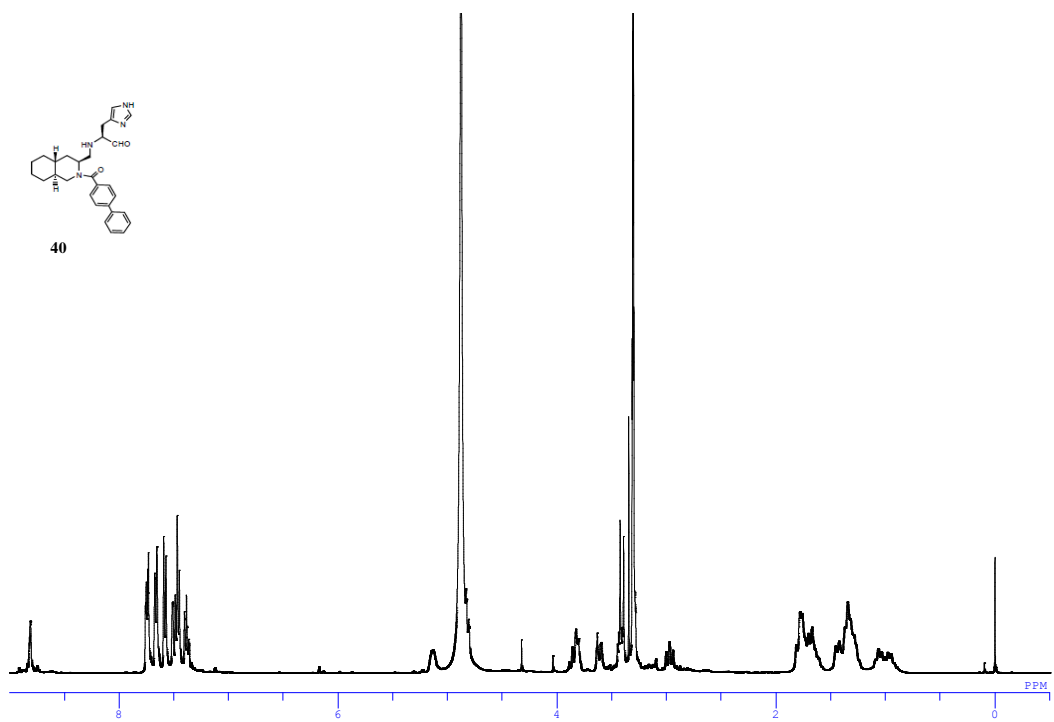

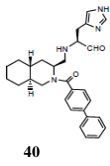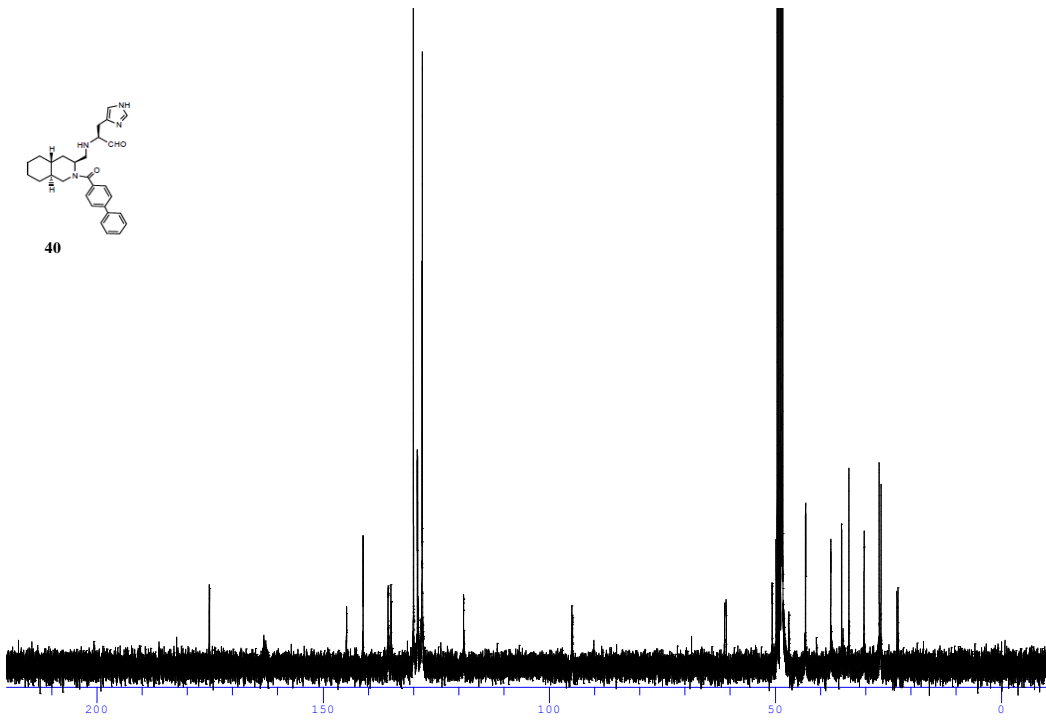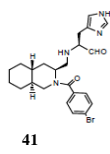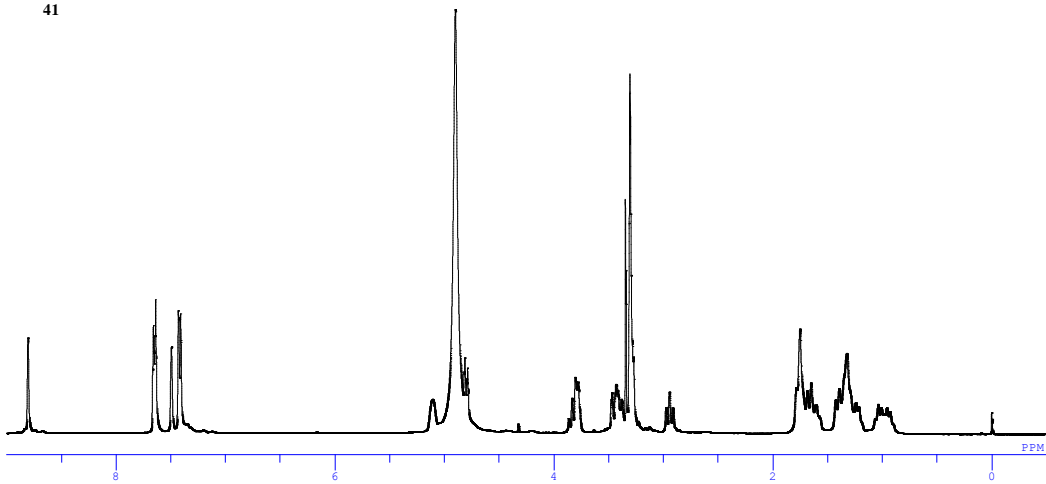

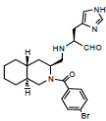

41

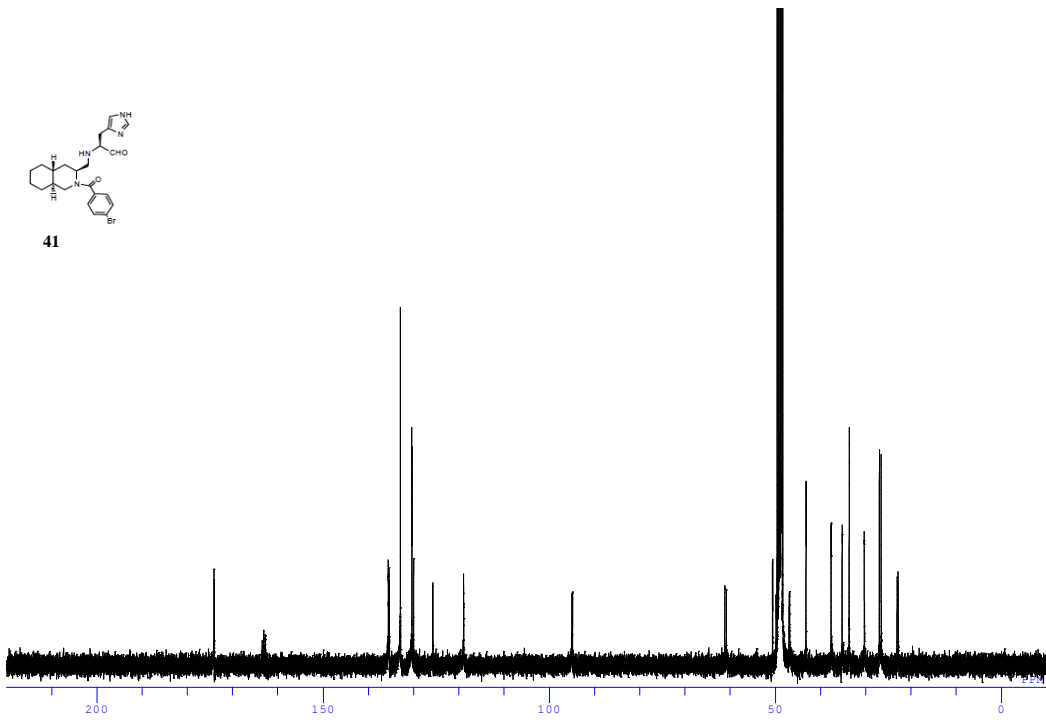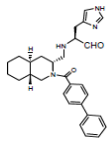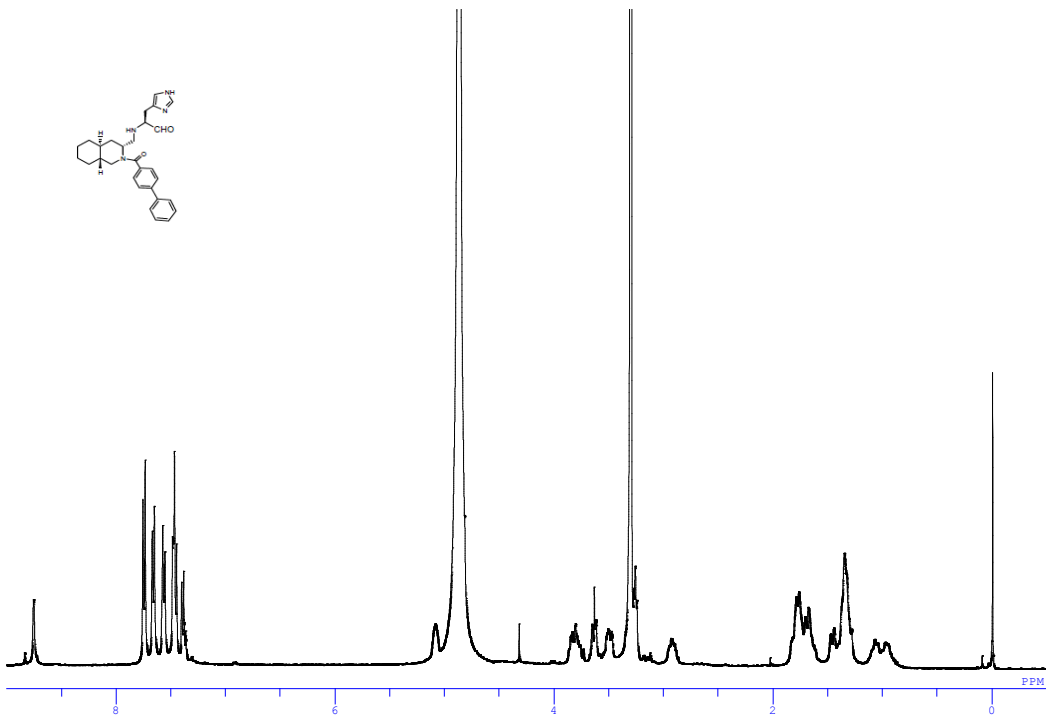

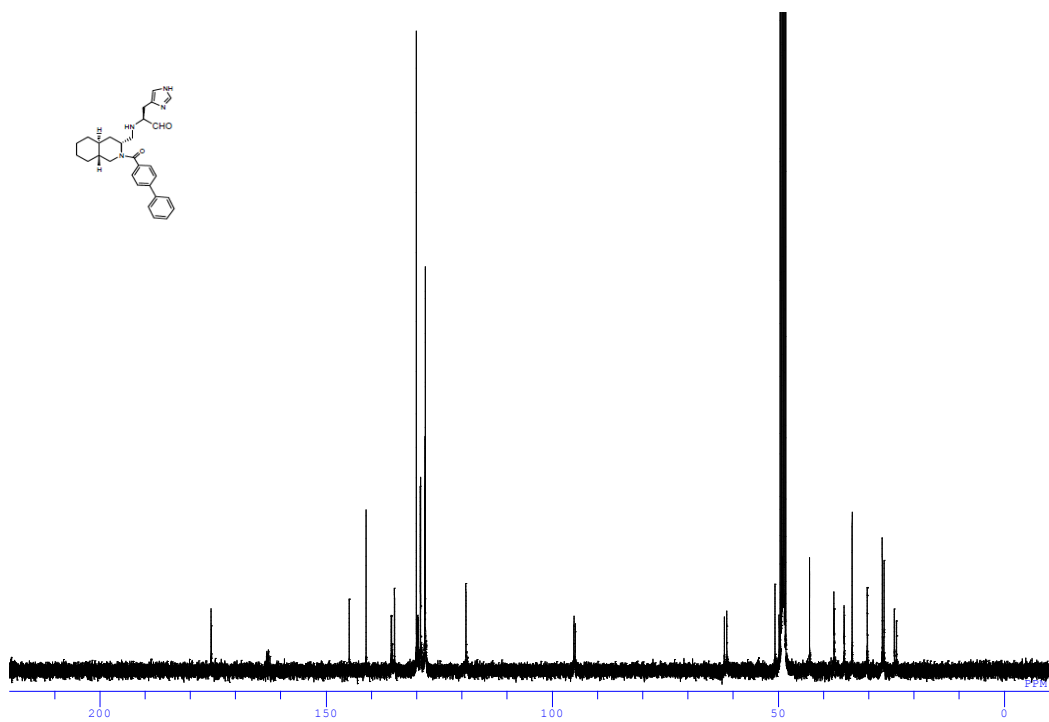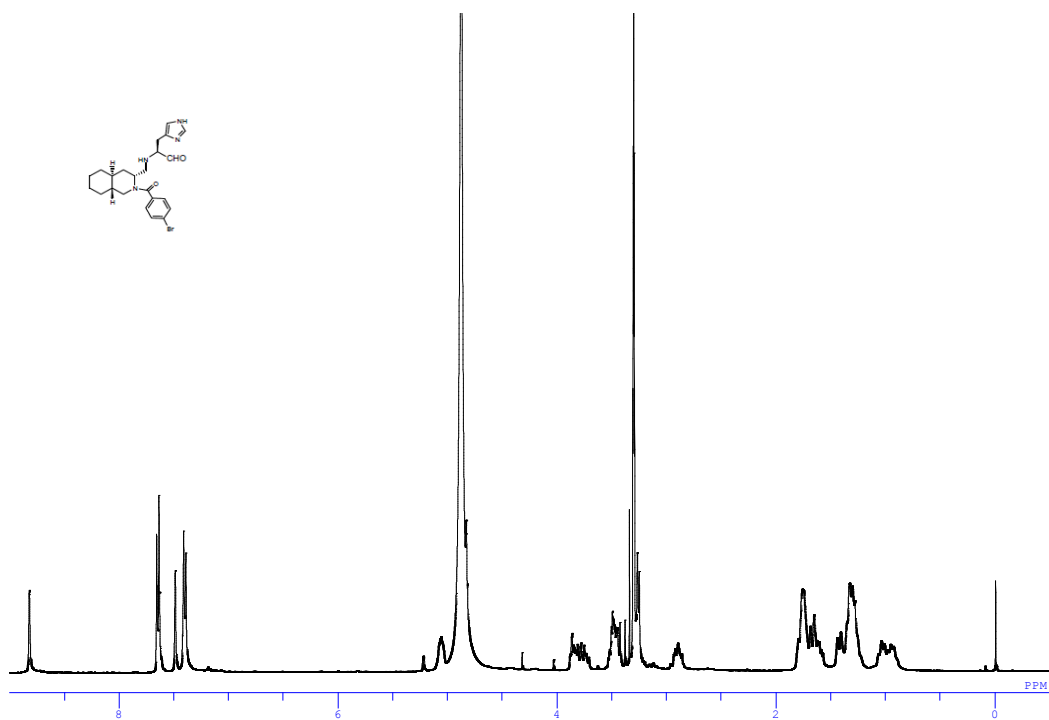

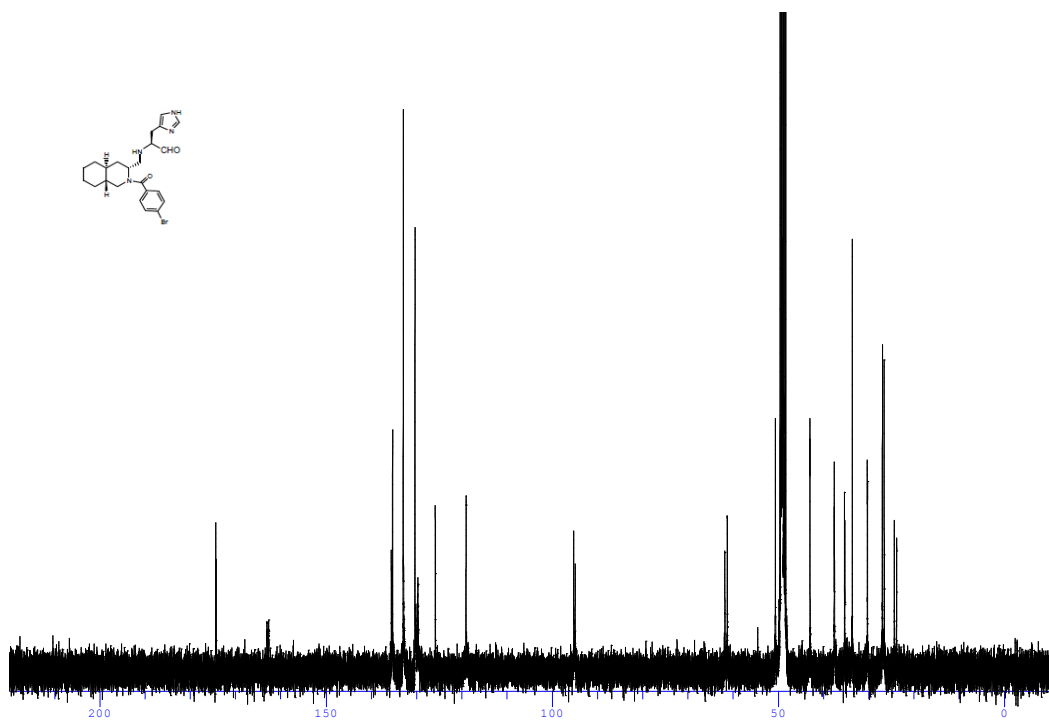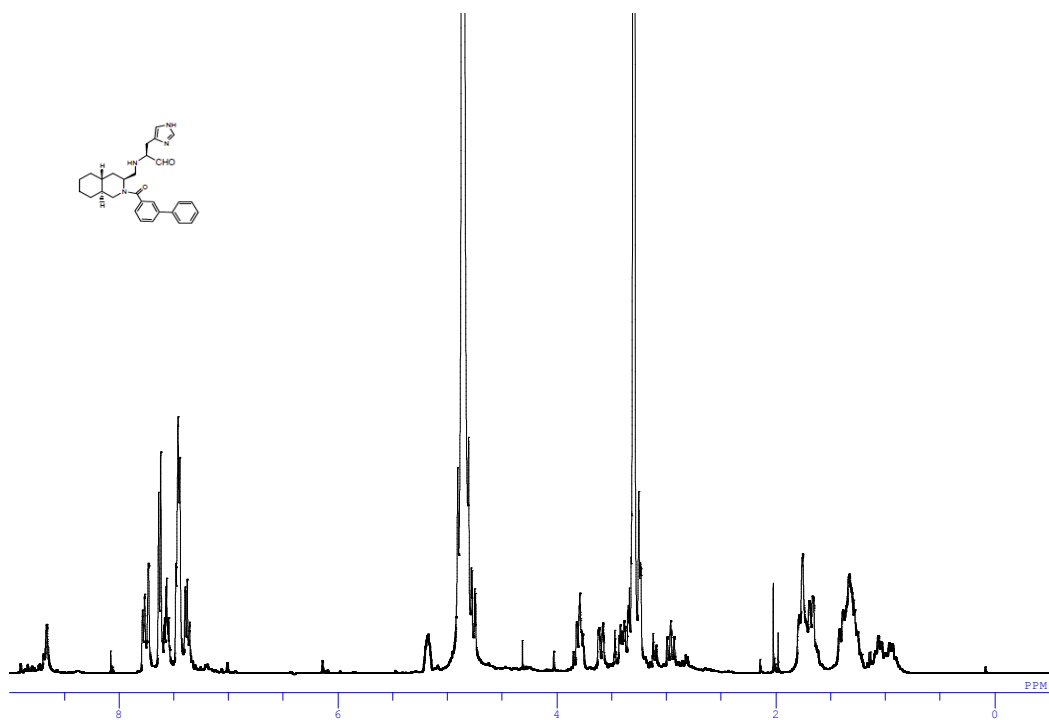

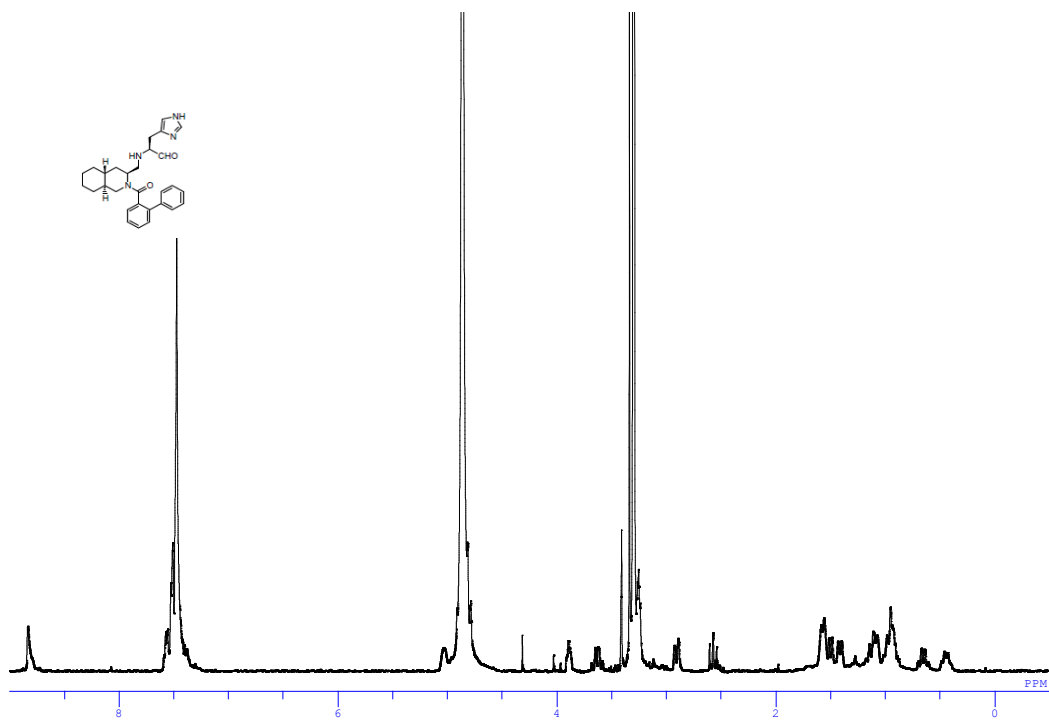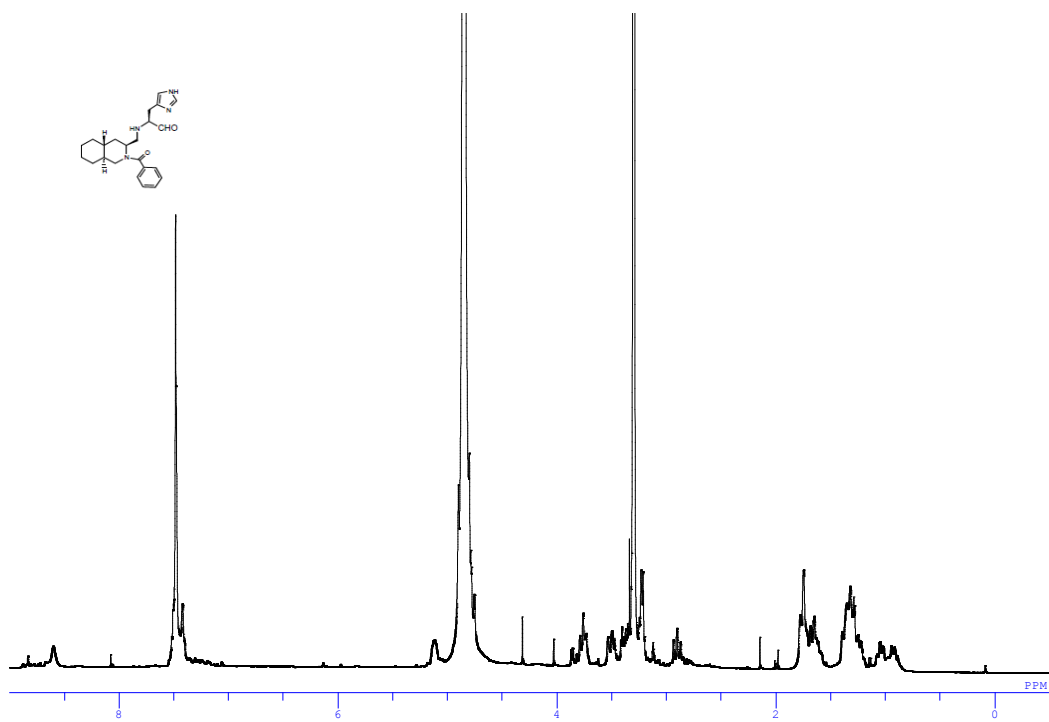

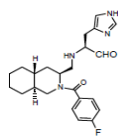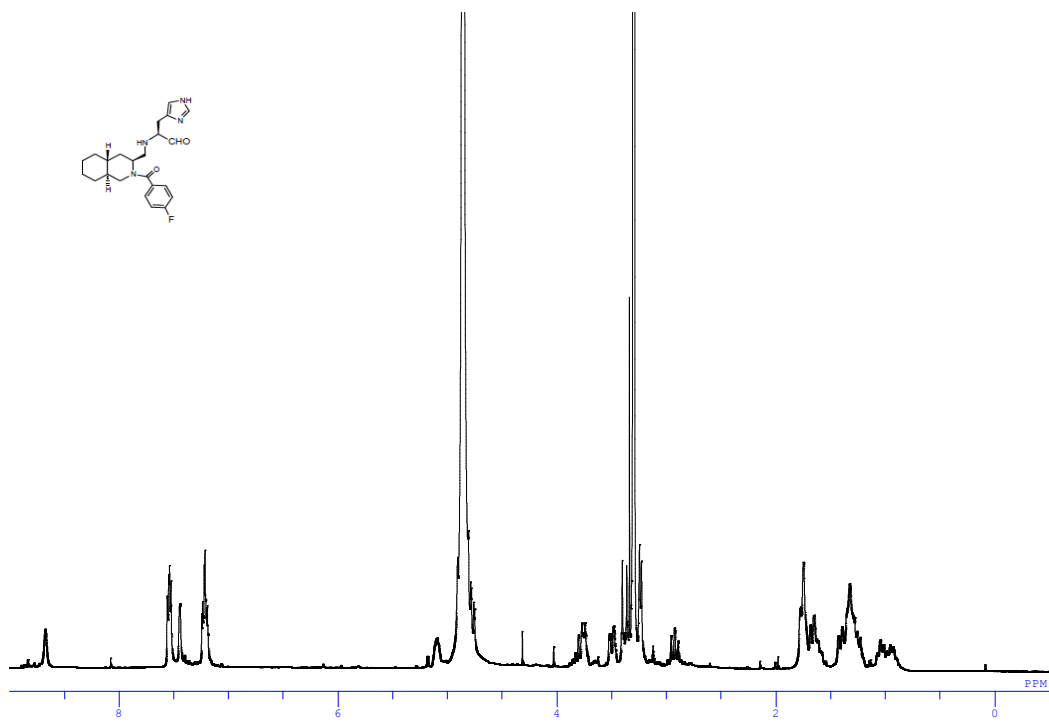



(b) Compounds included in the supporting information

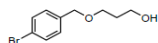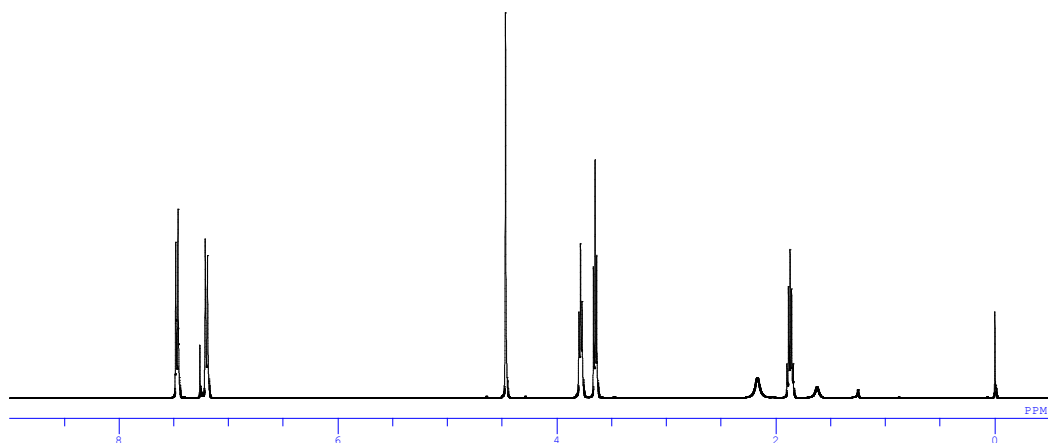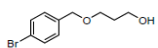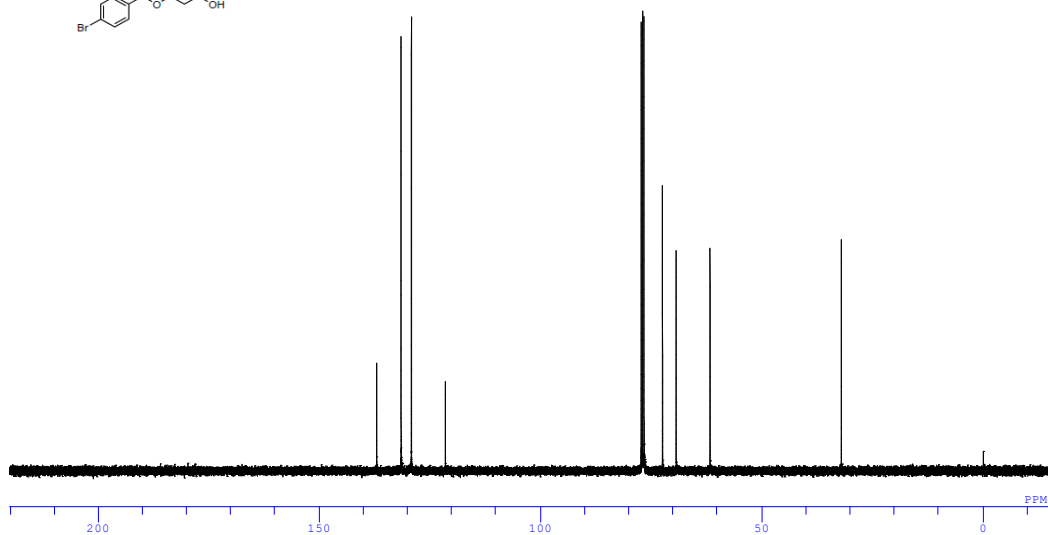

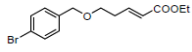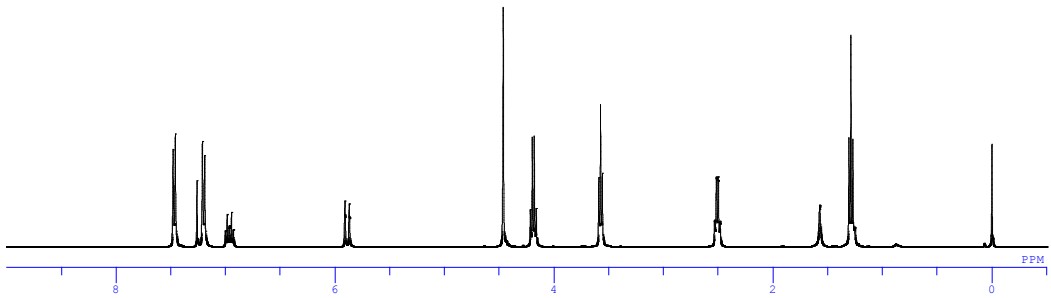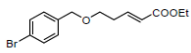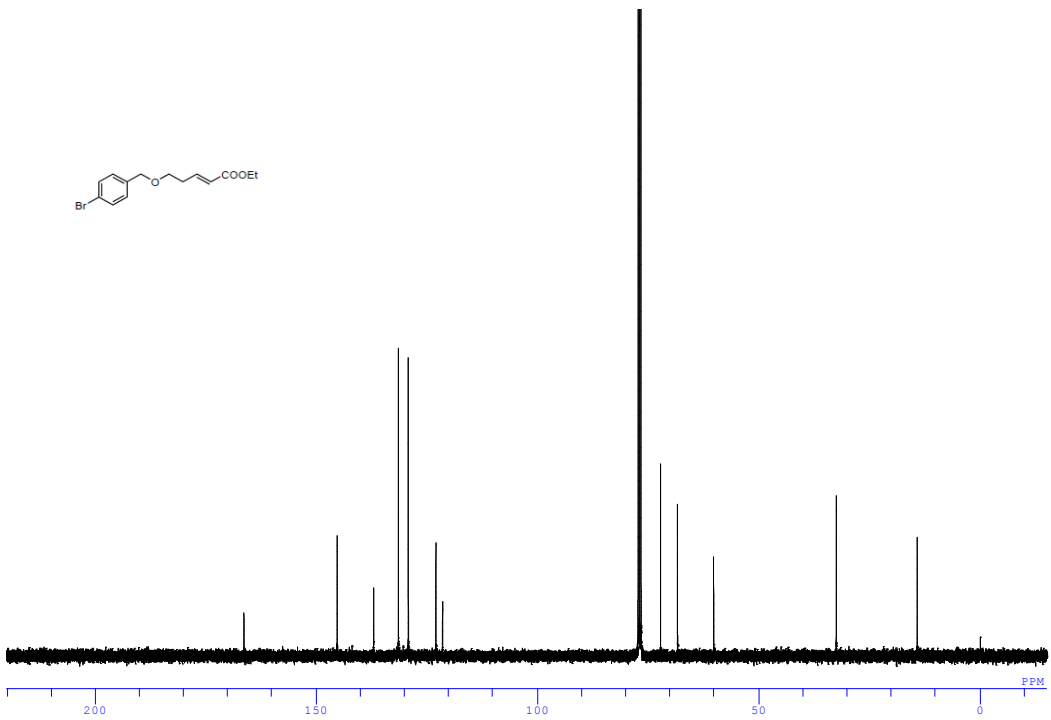

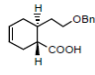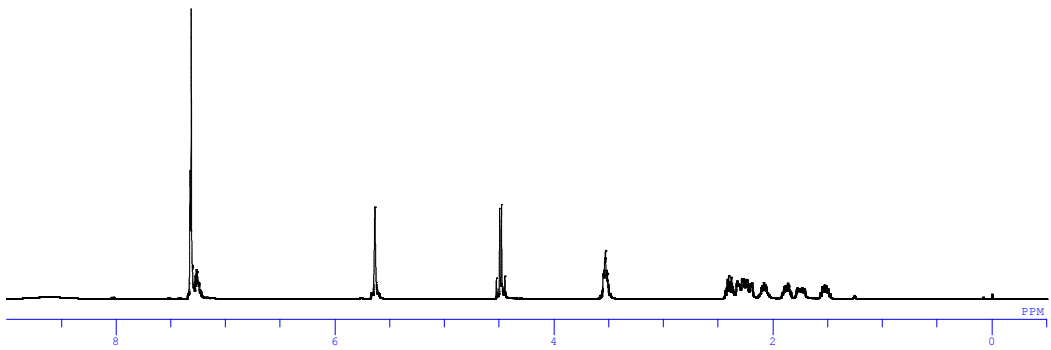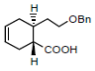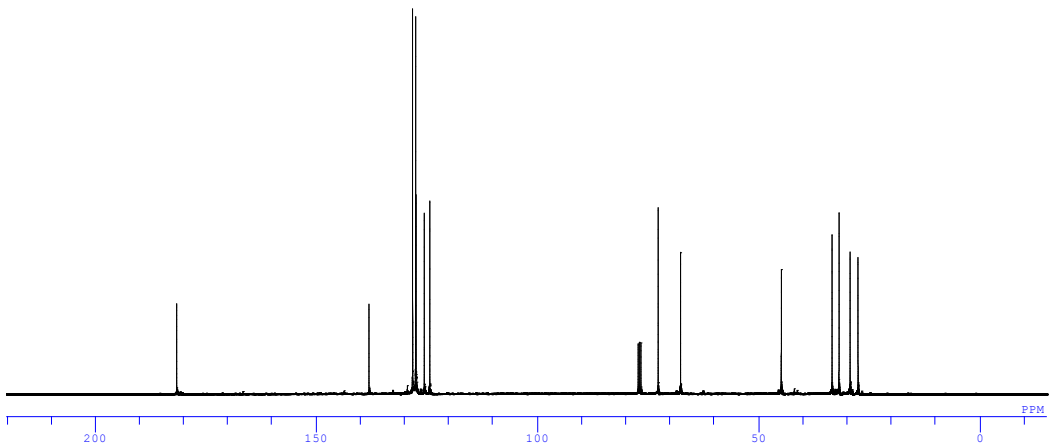

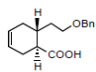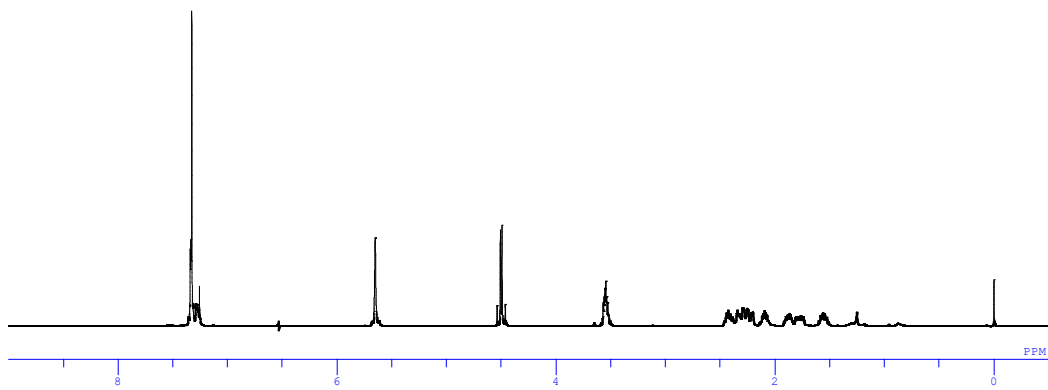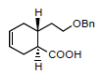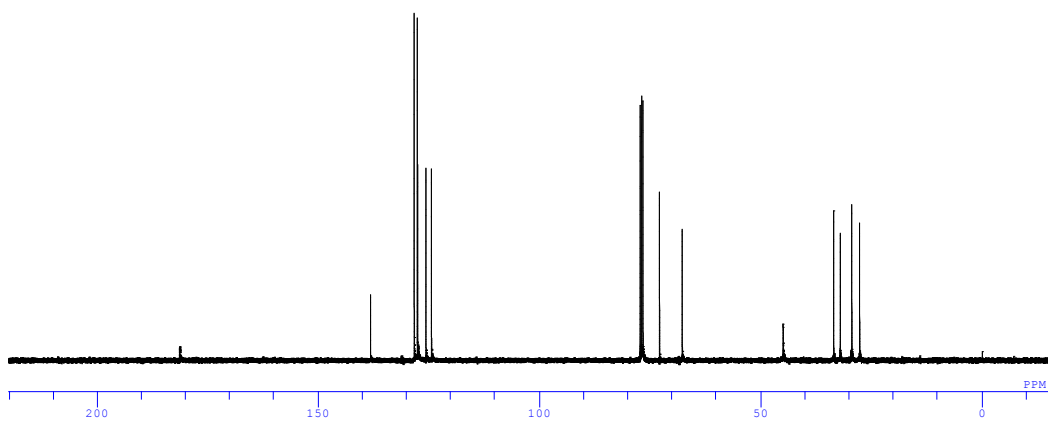

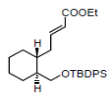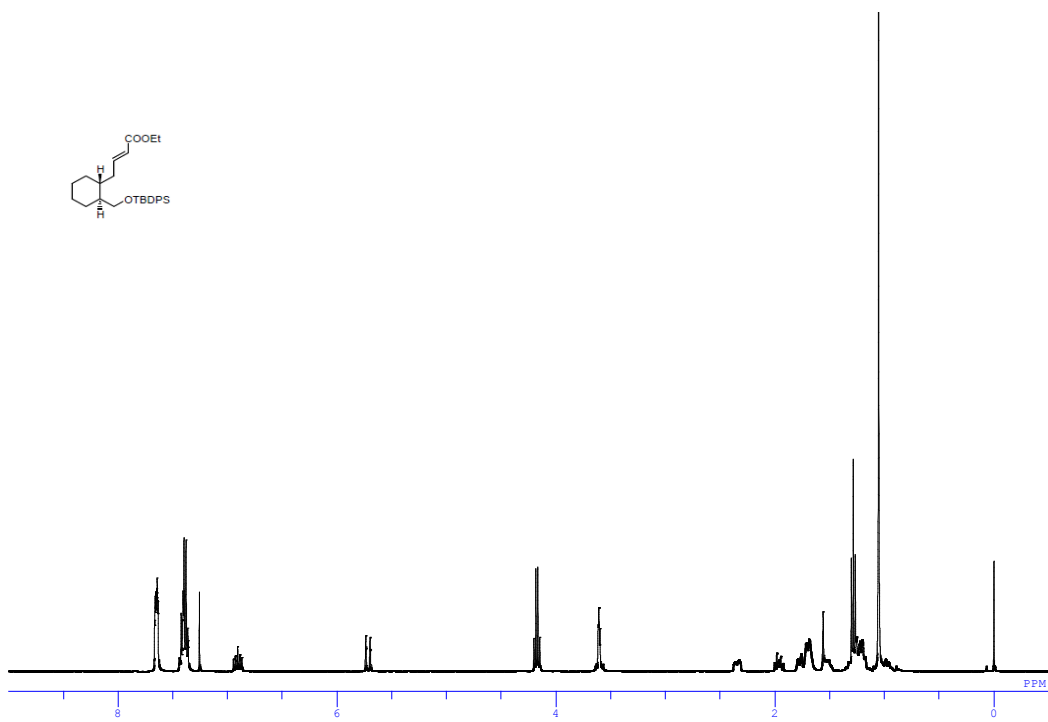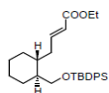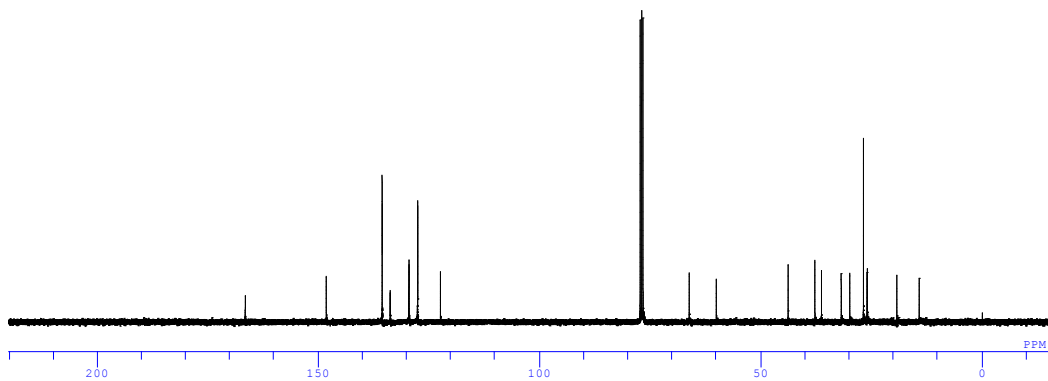

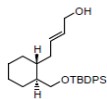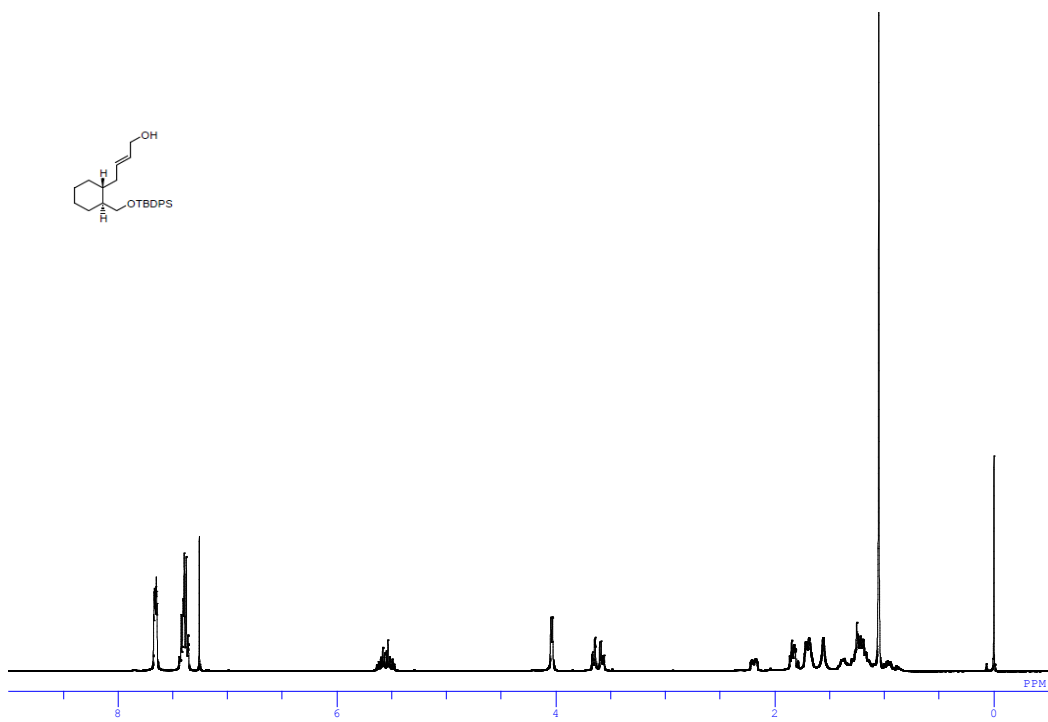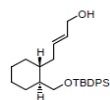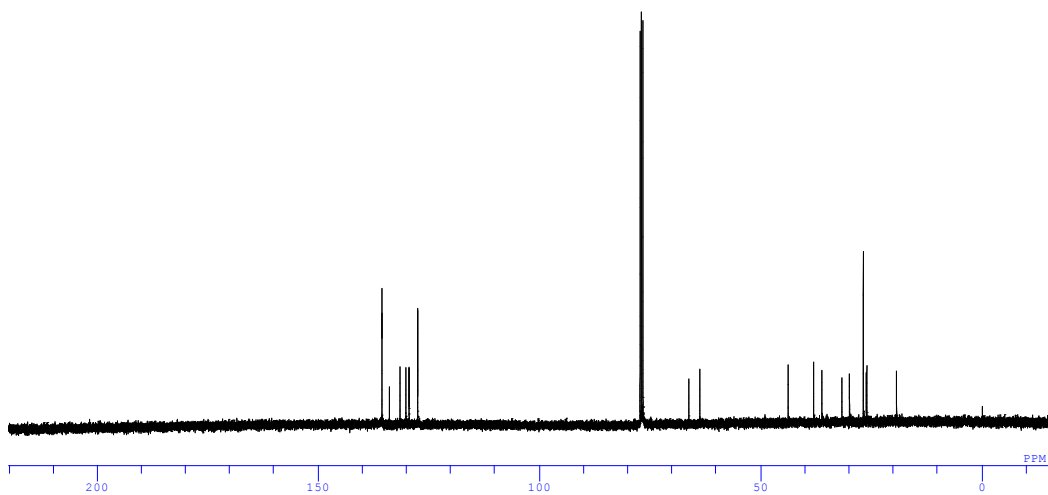

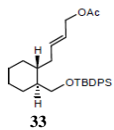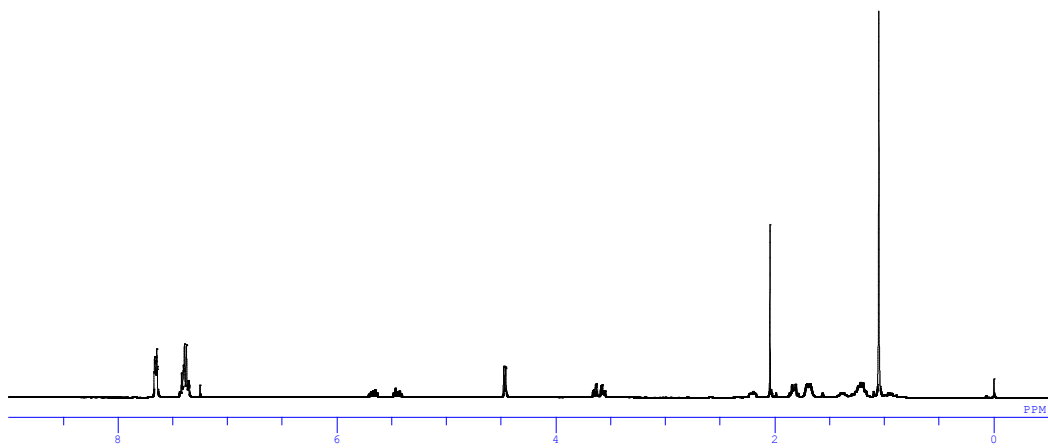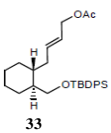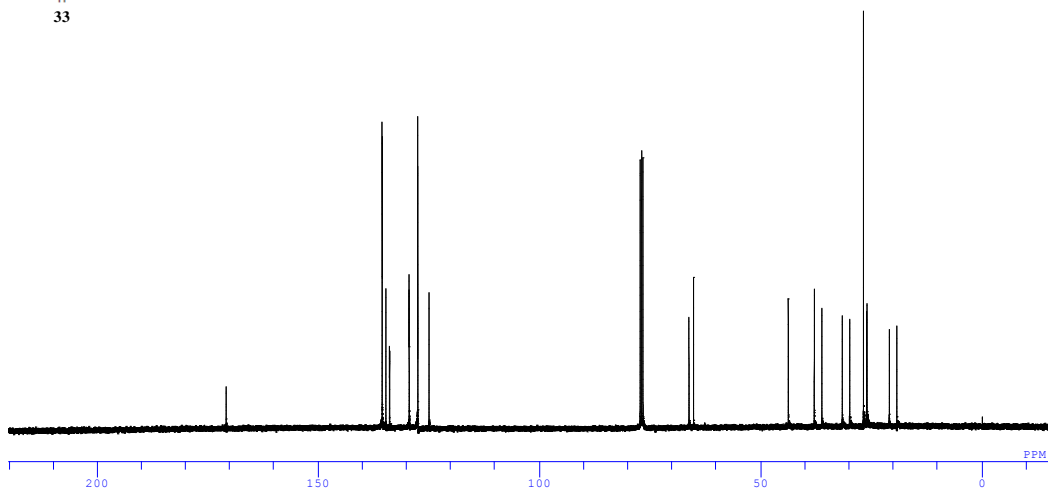

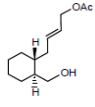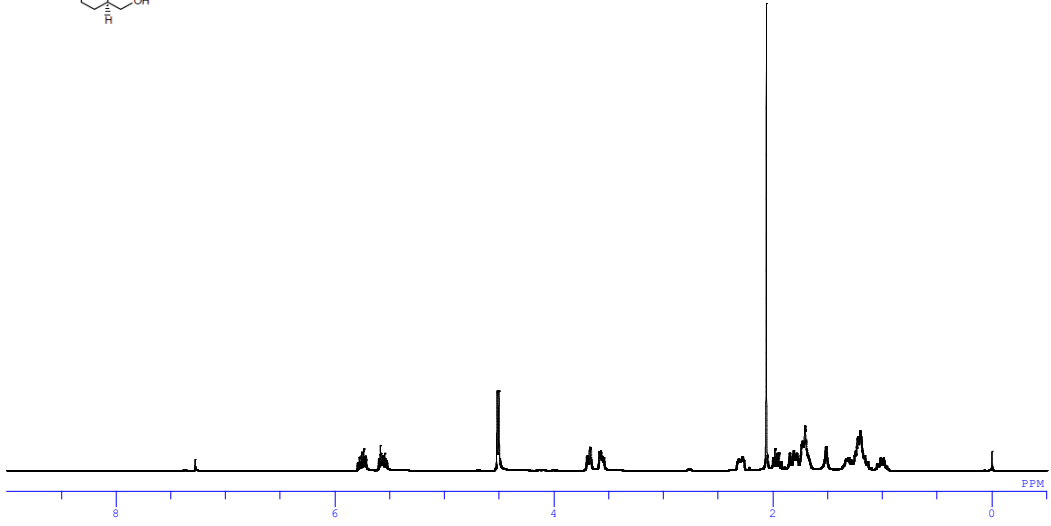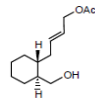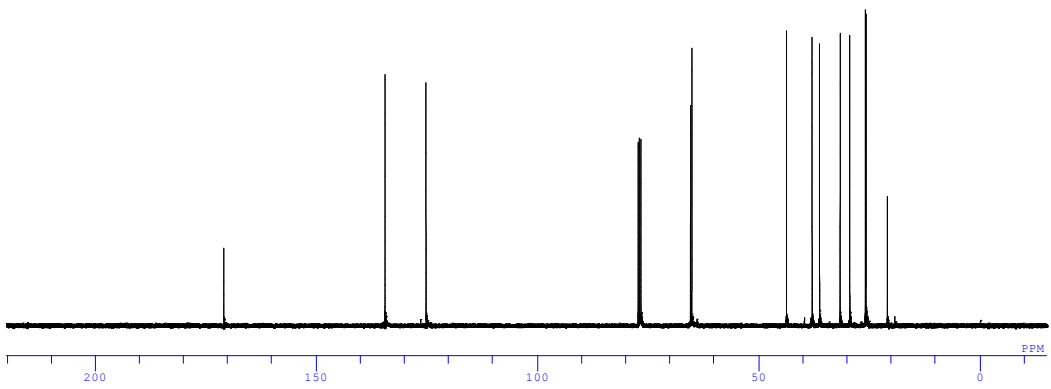



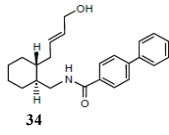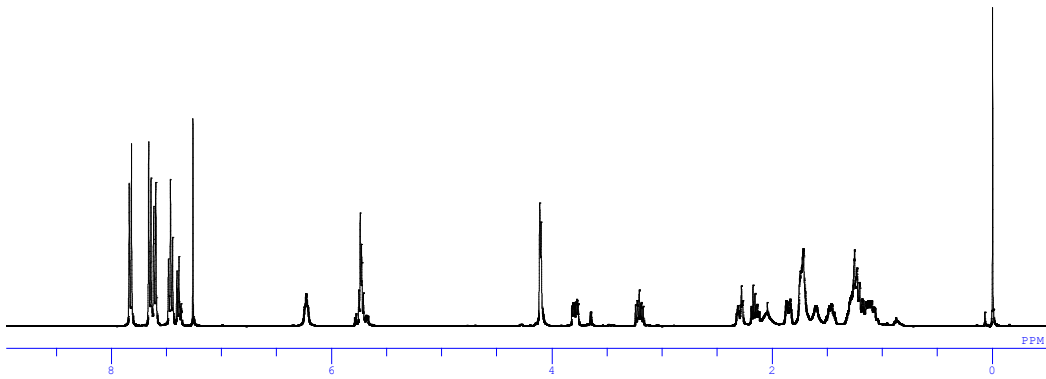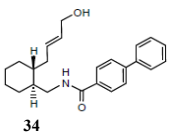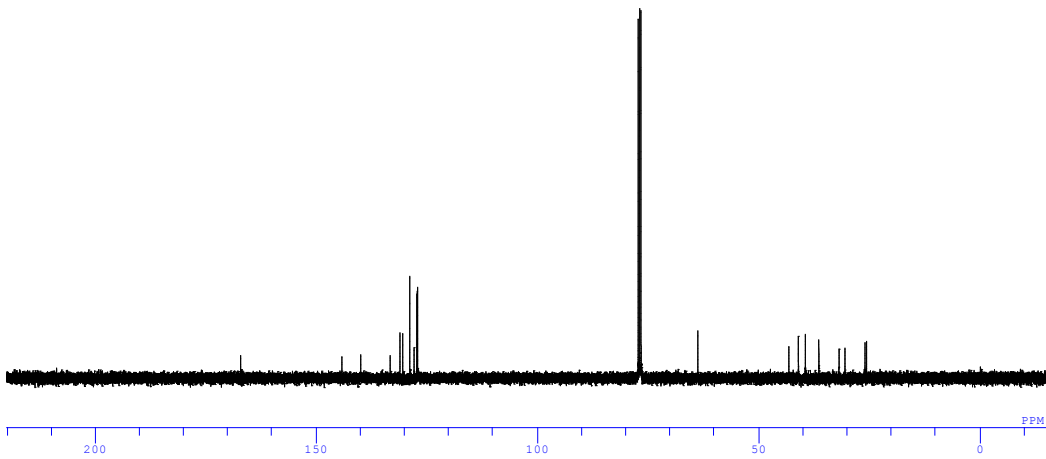

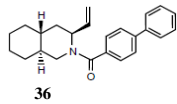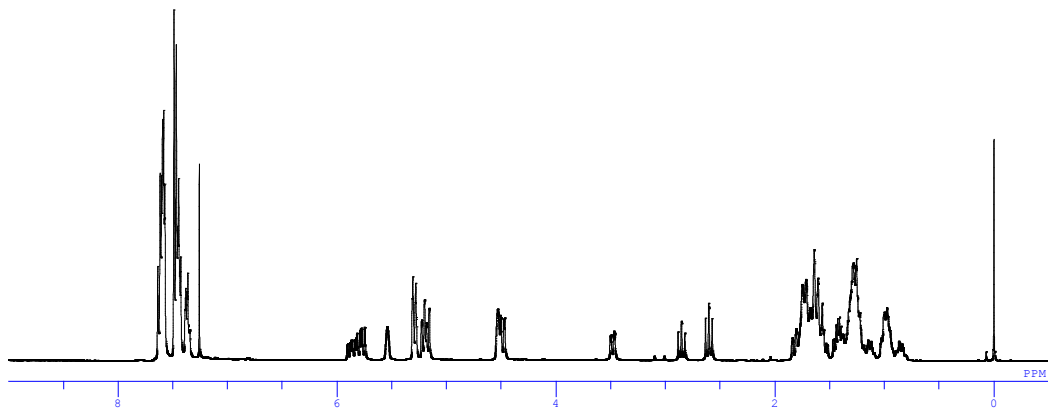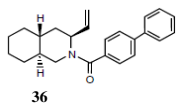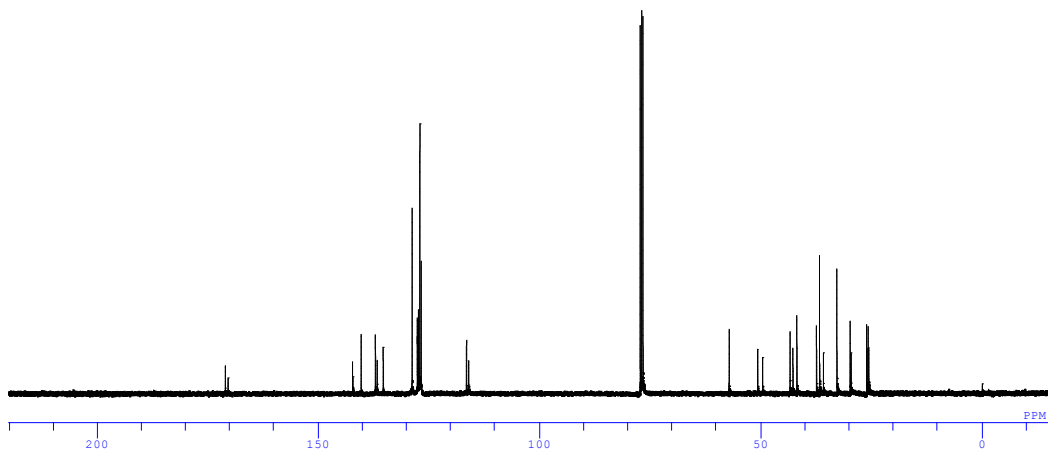

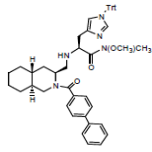

38

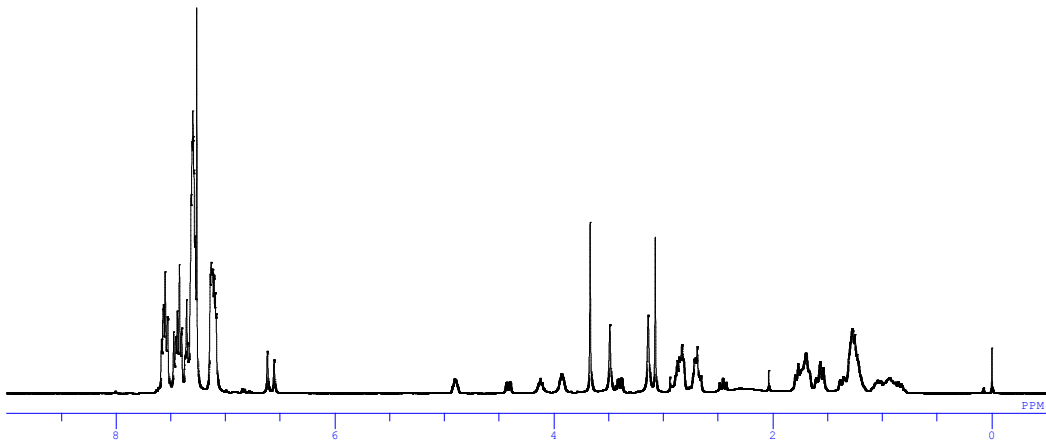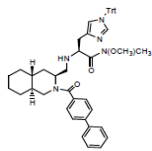

38

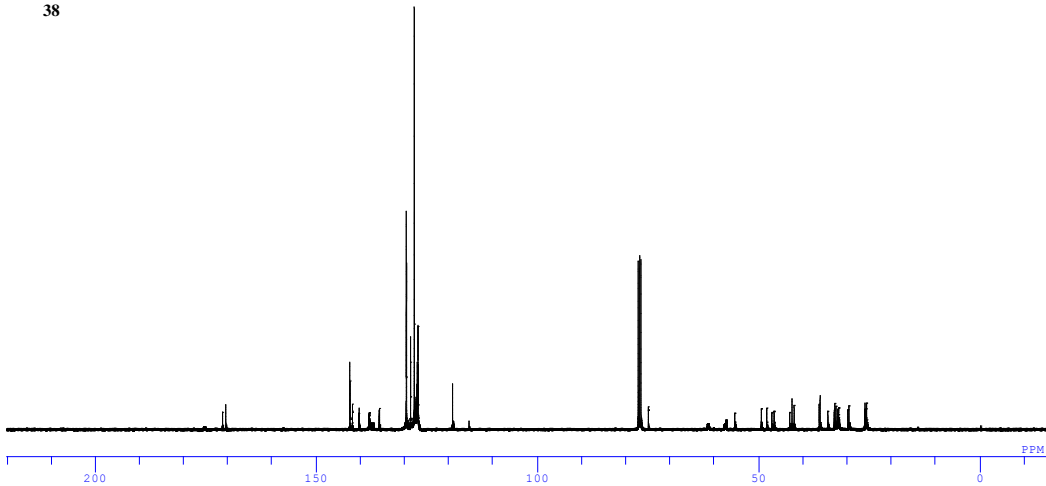

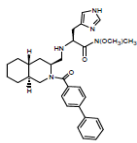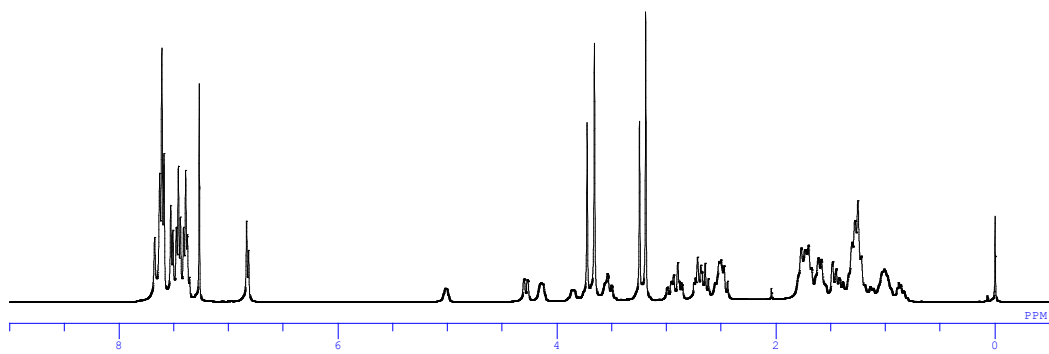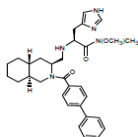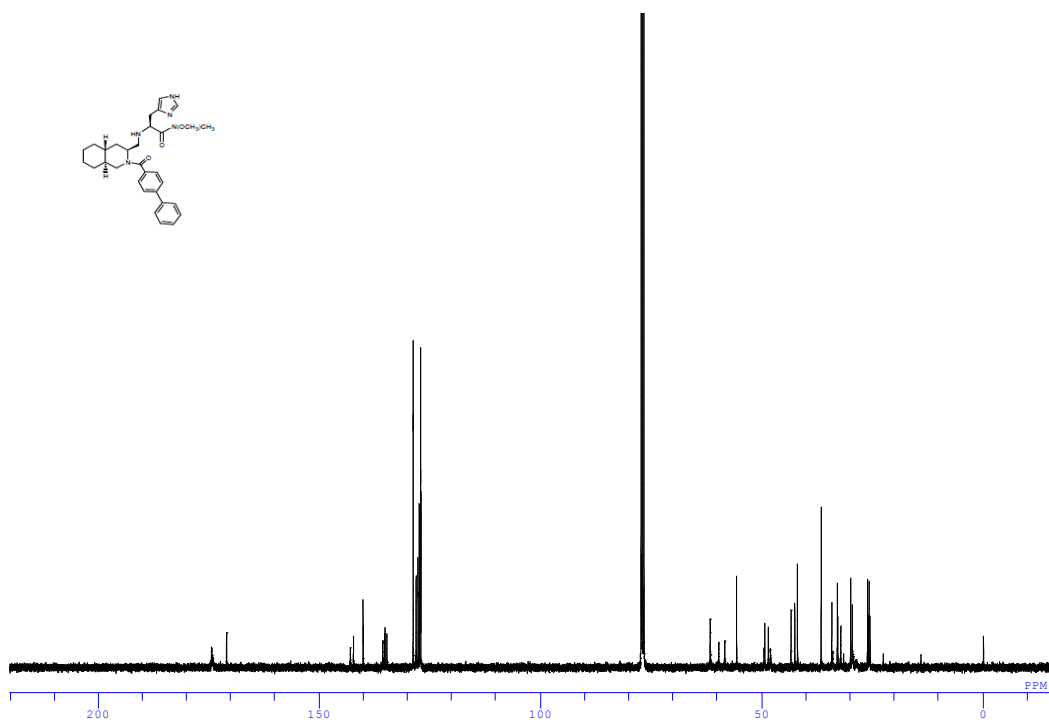

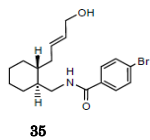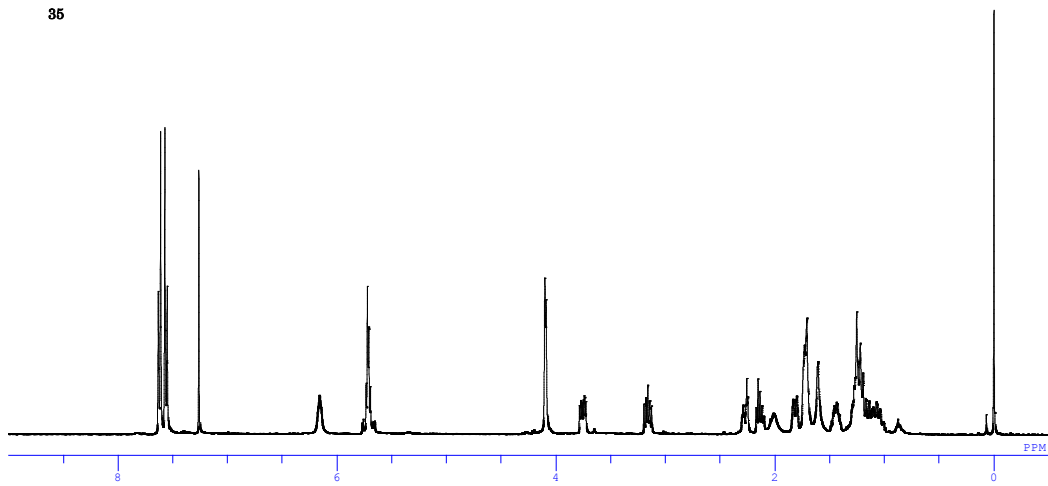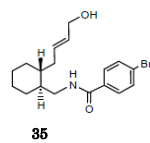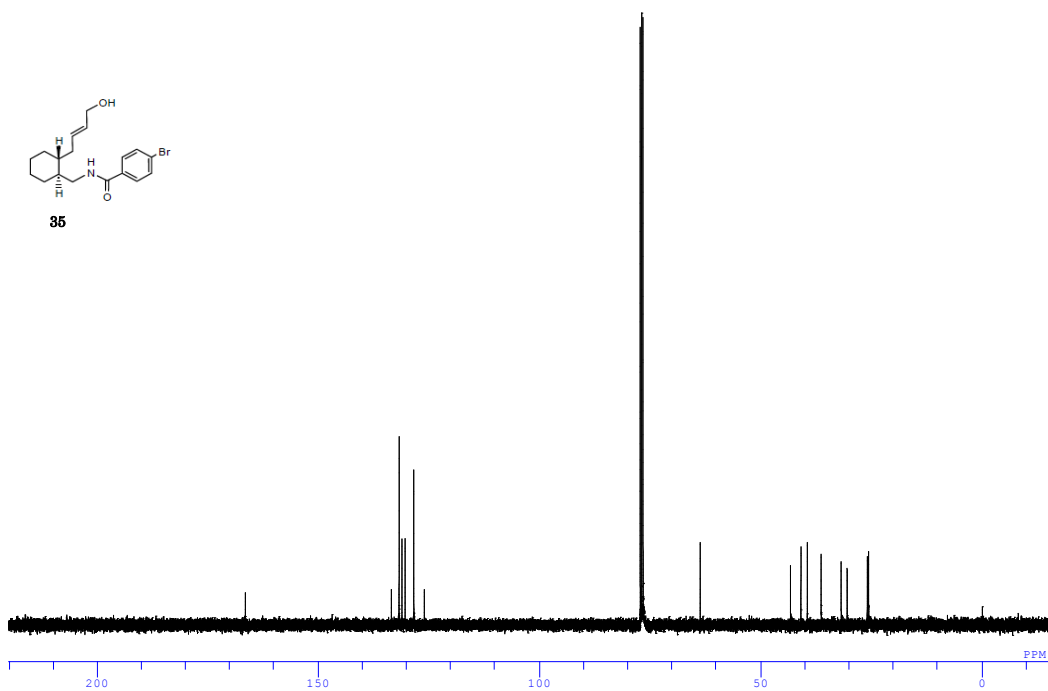

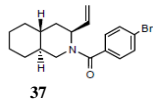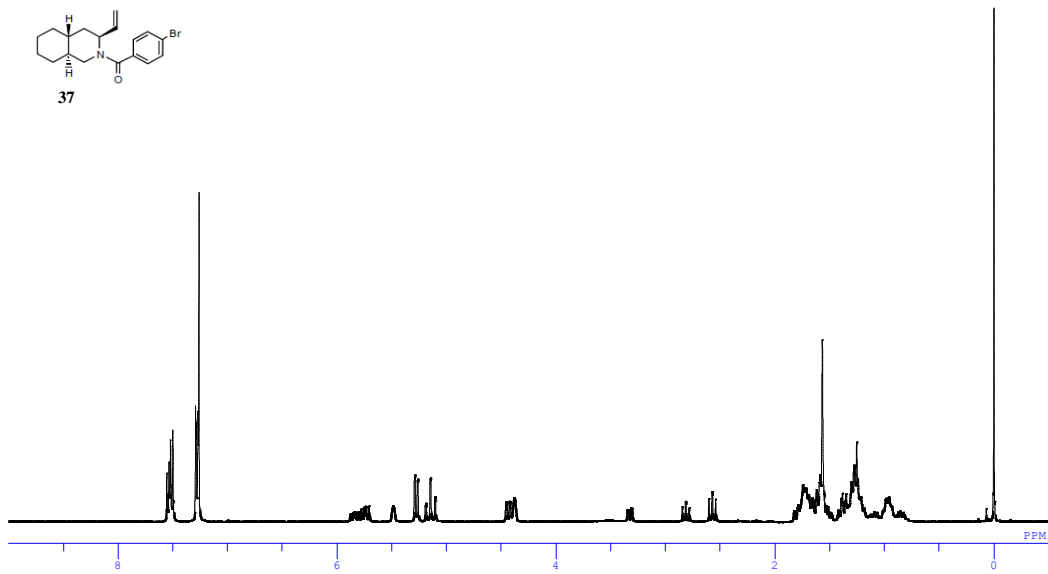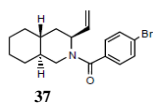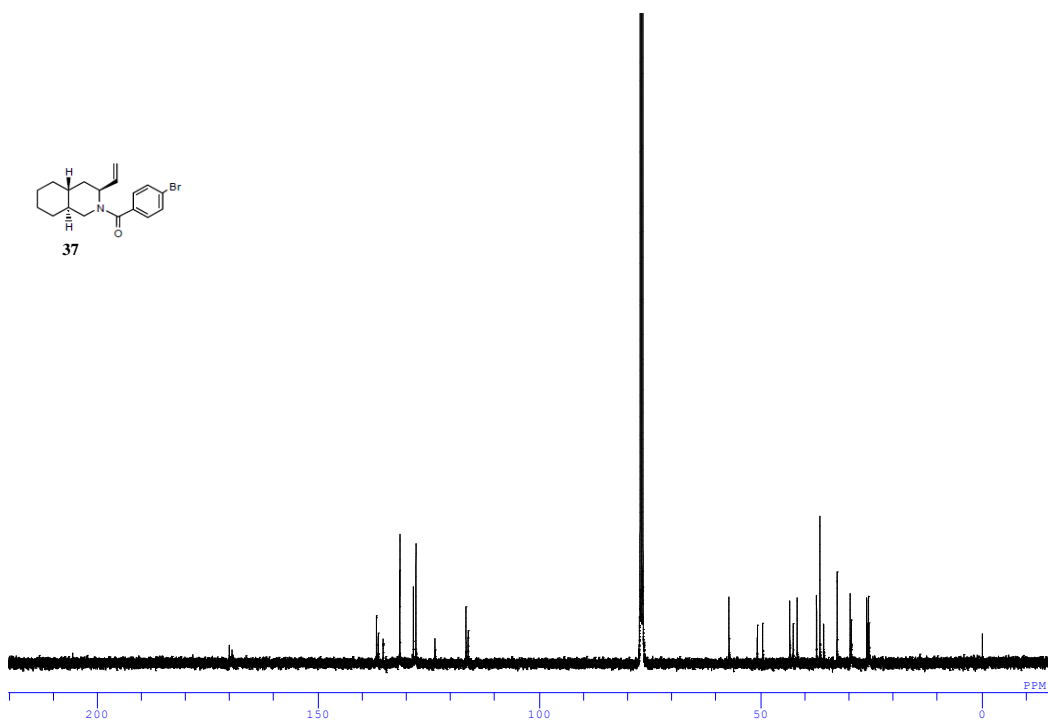

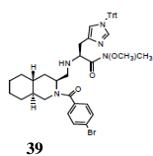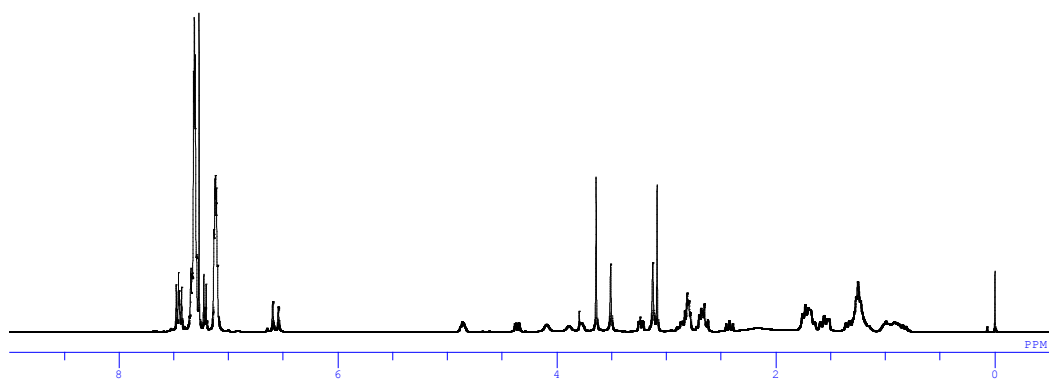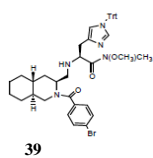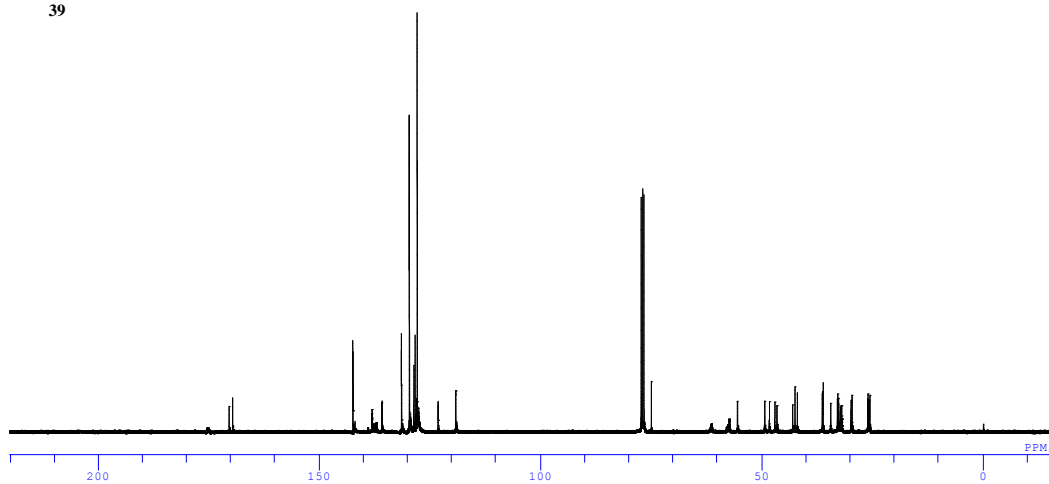

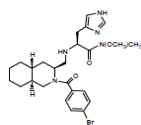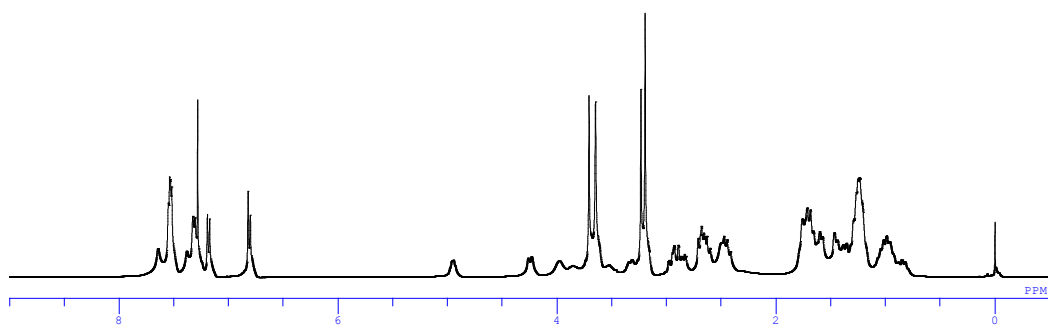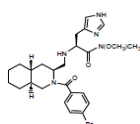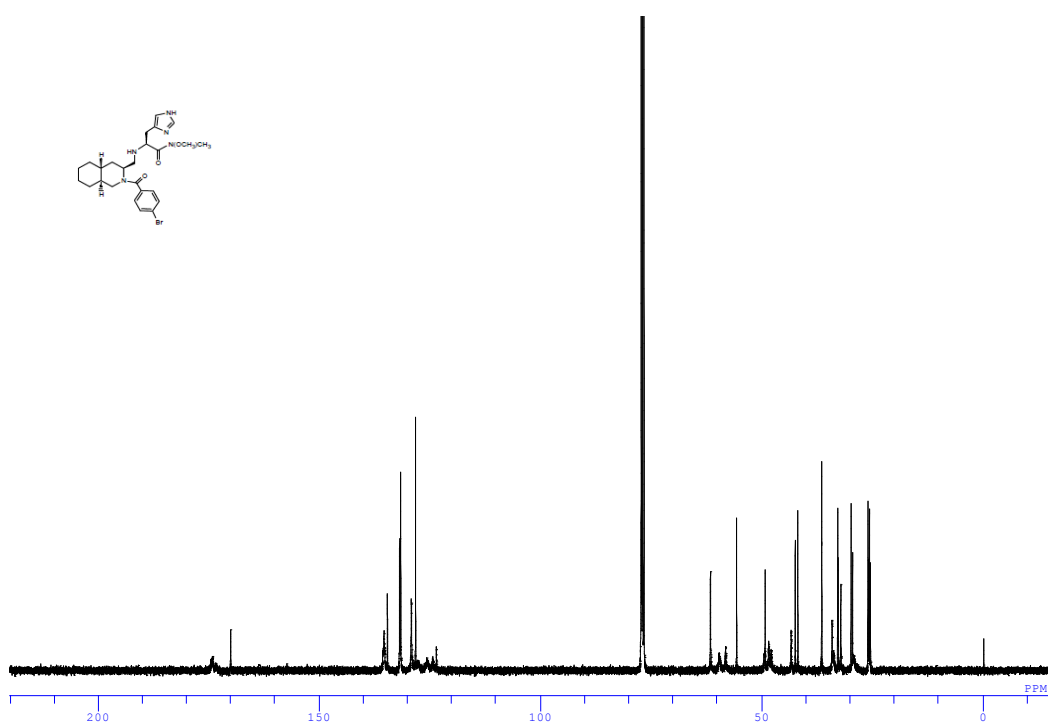



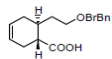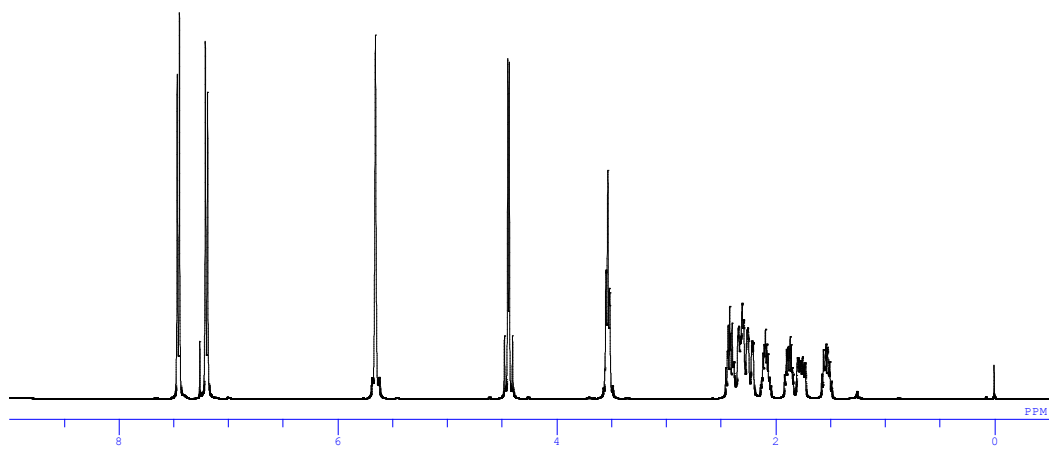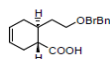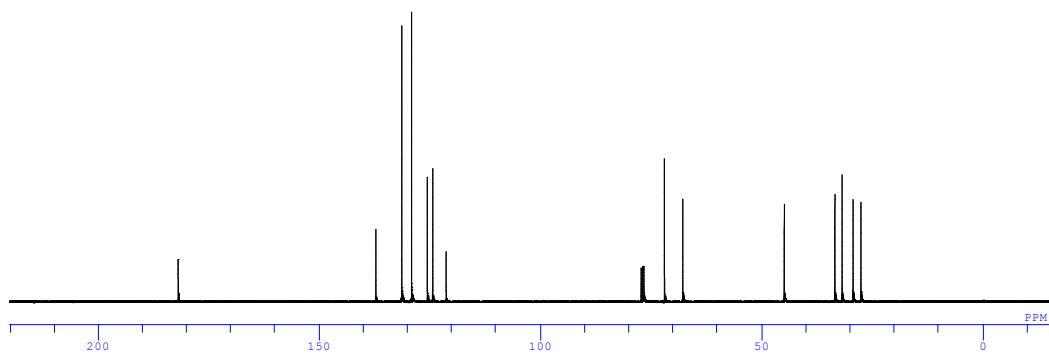

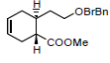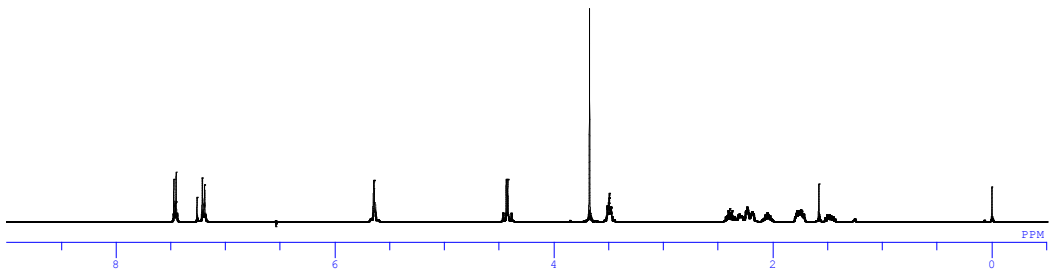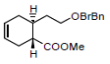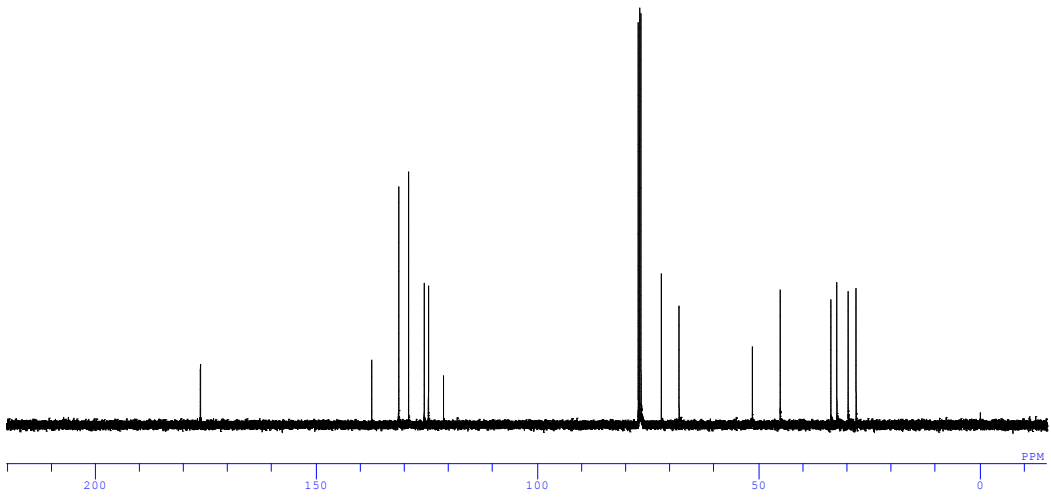

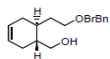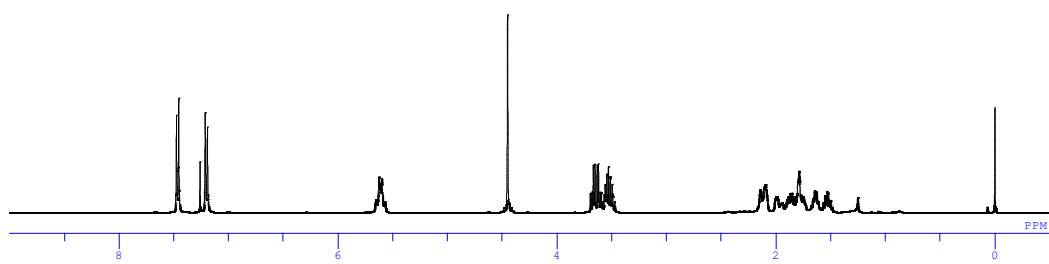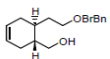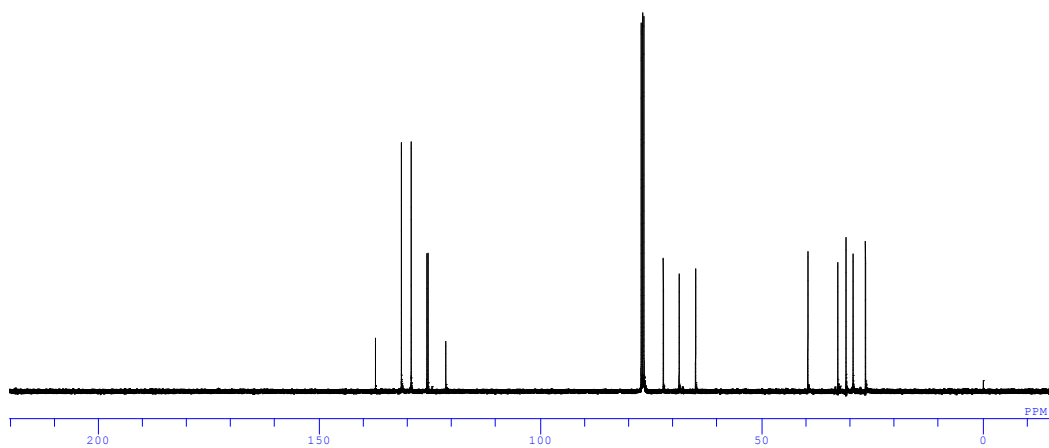

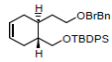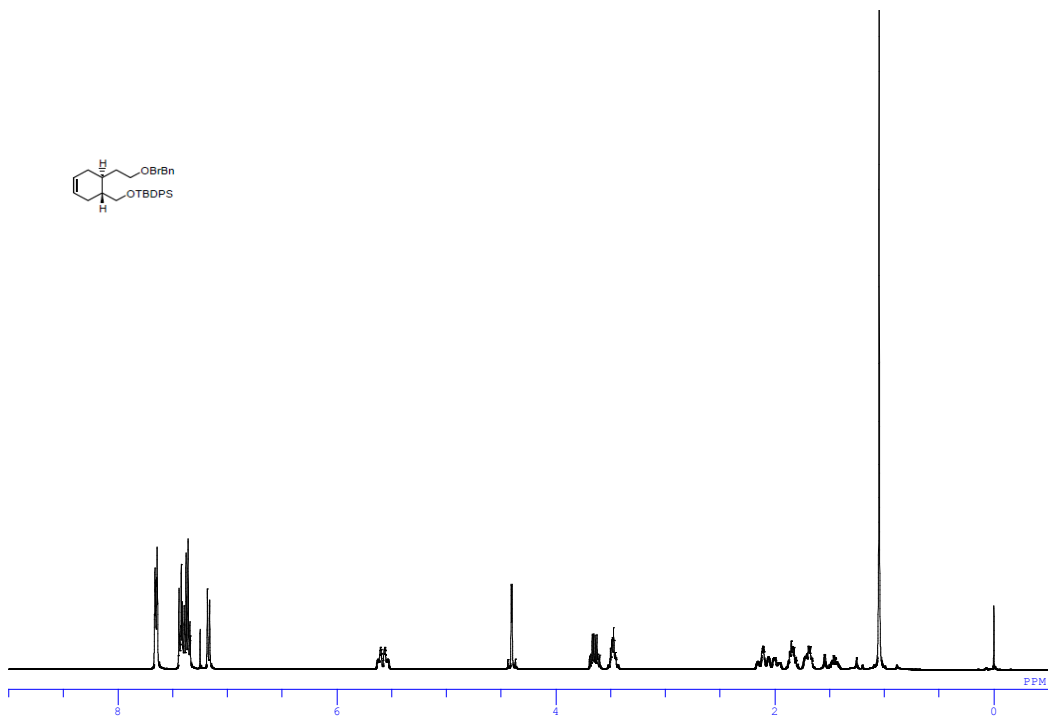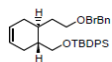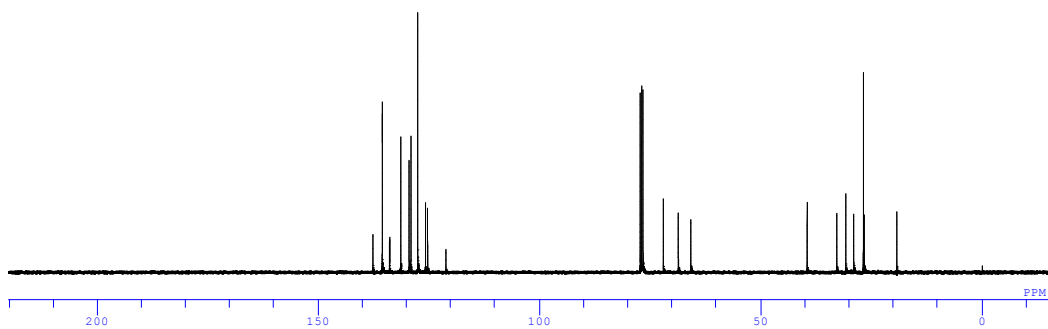

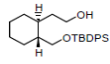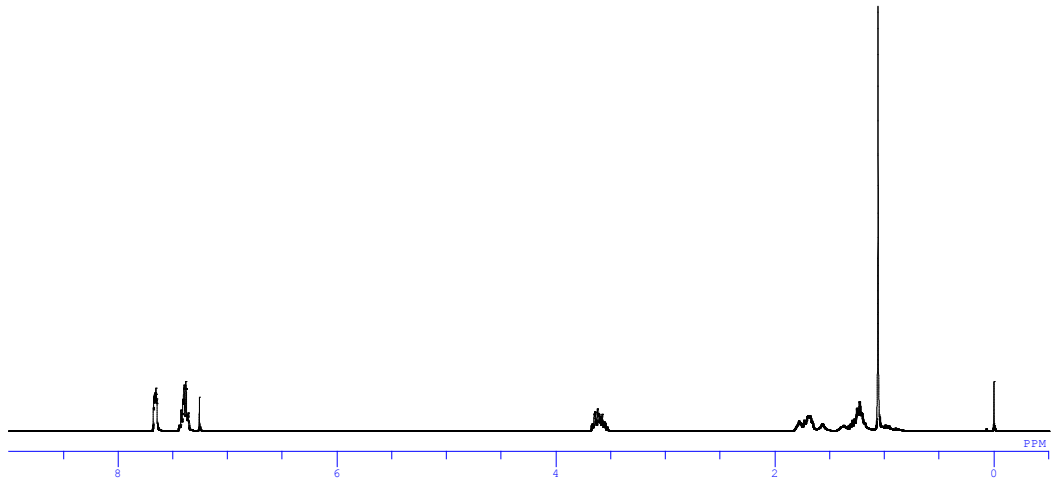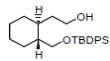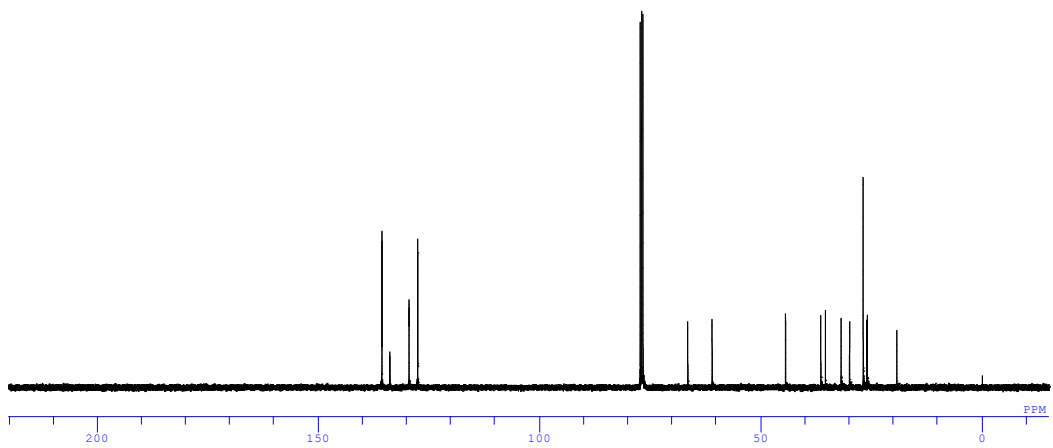

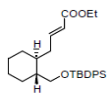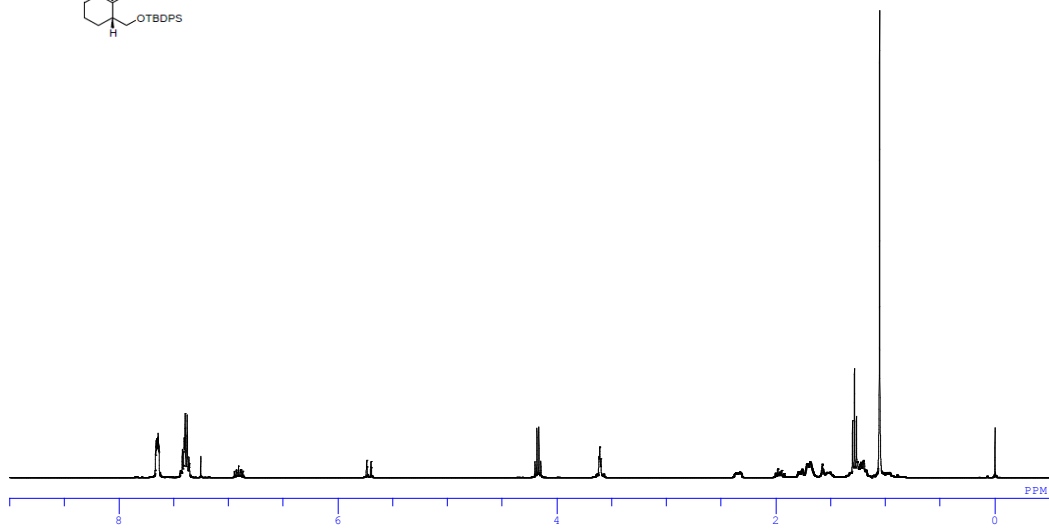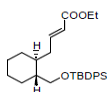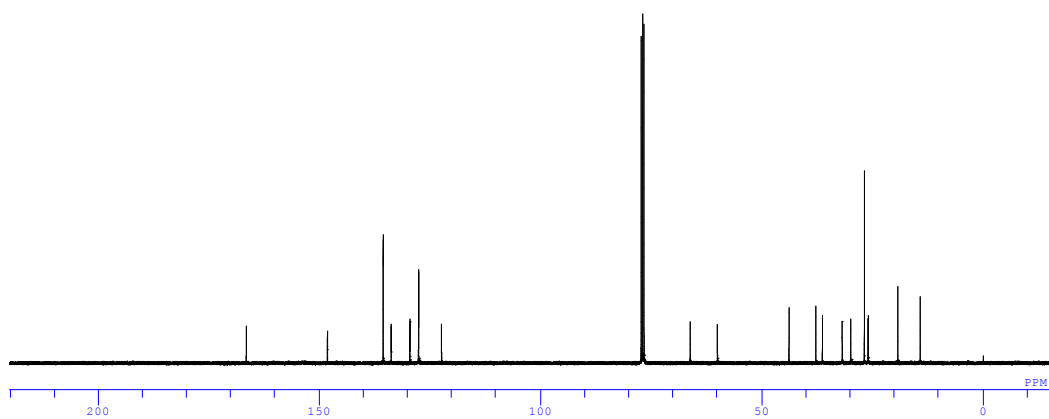

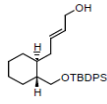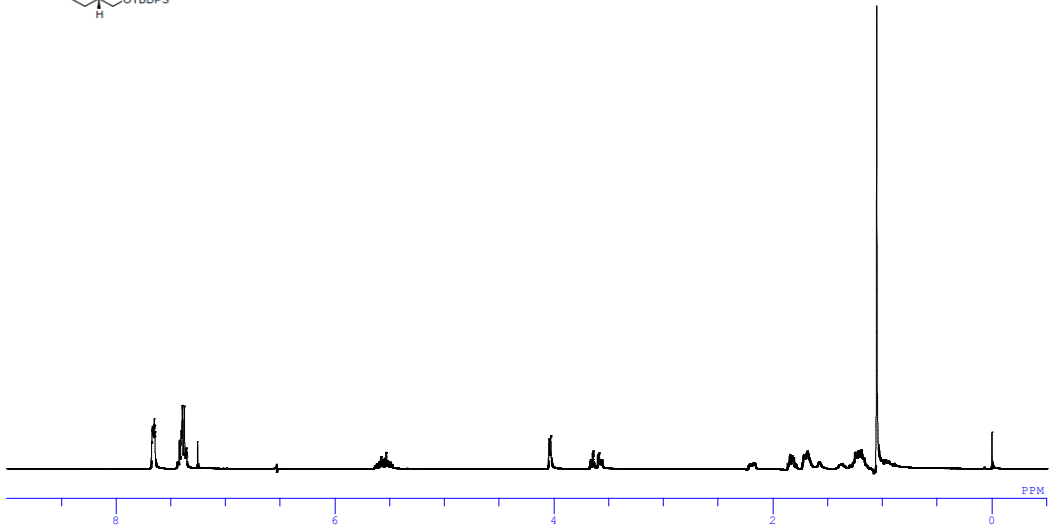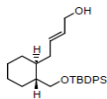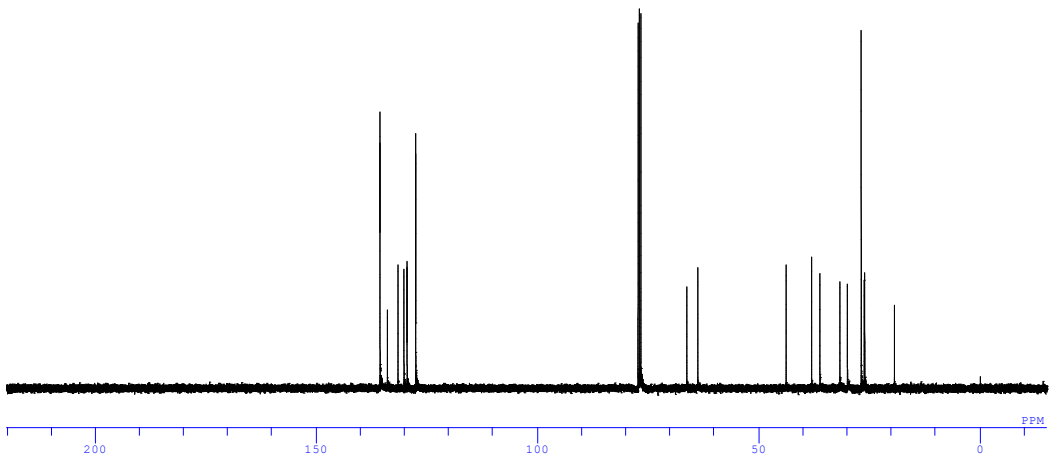

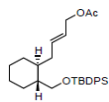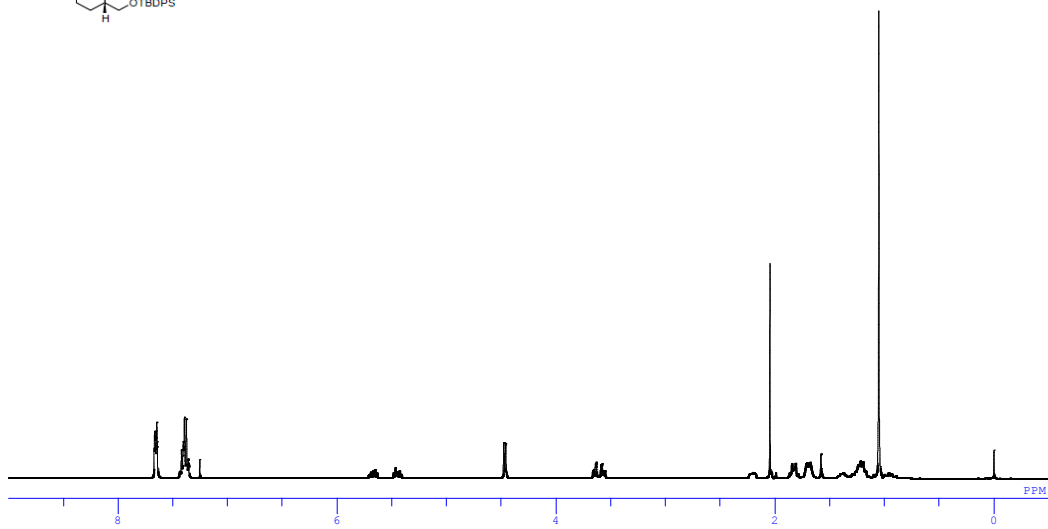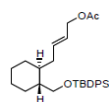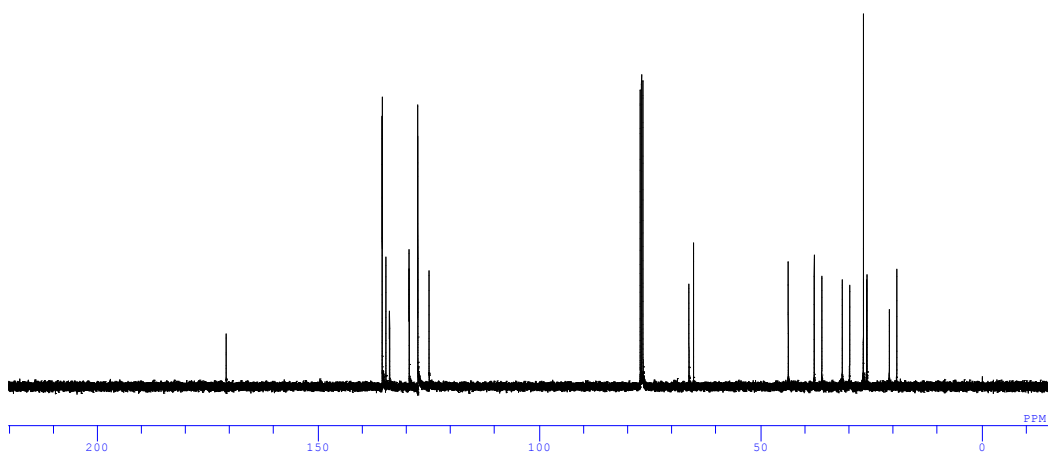



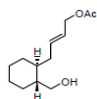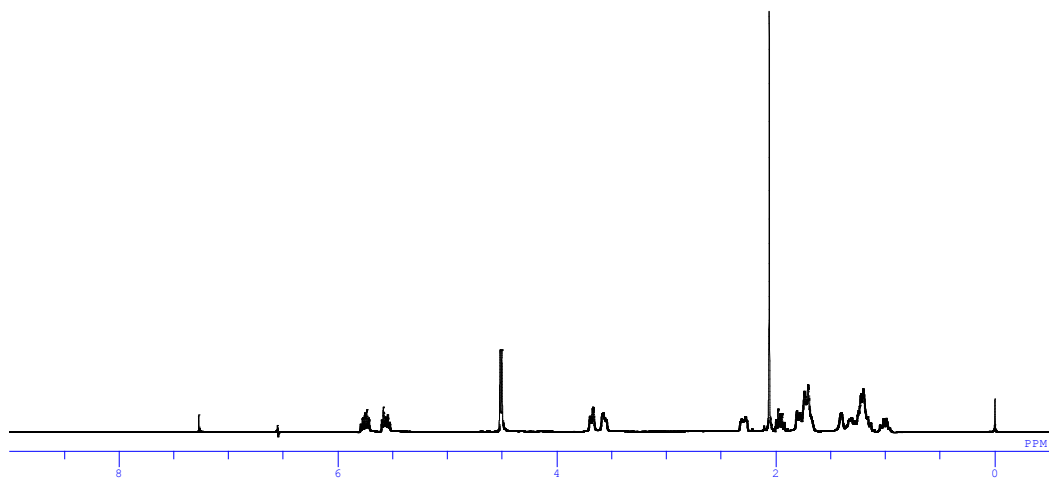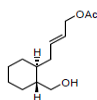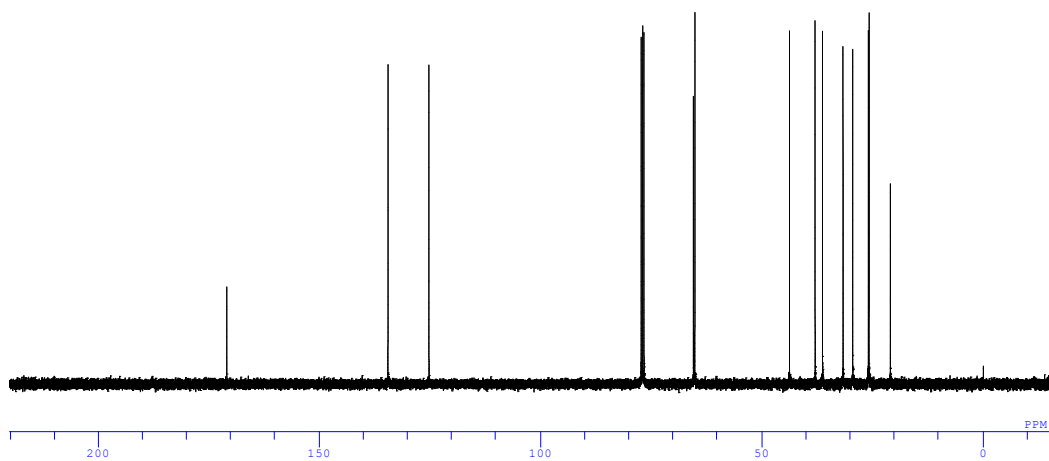

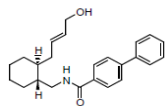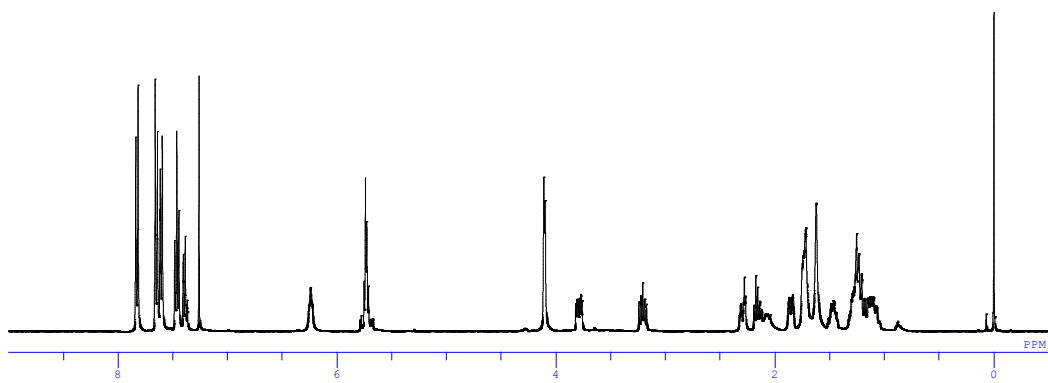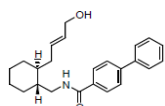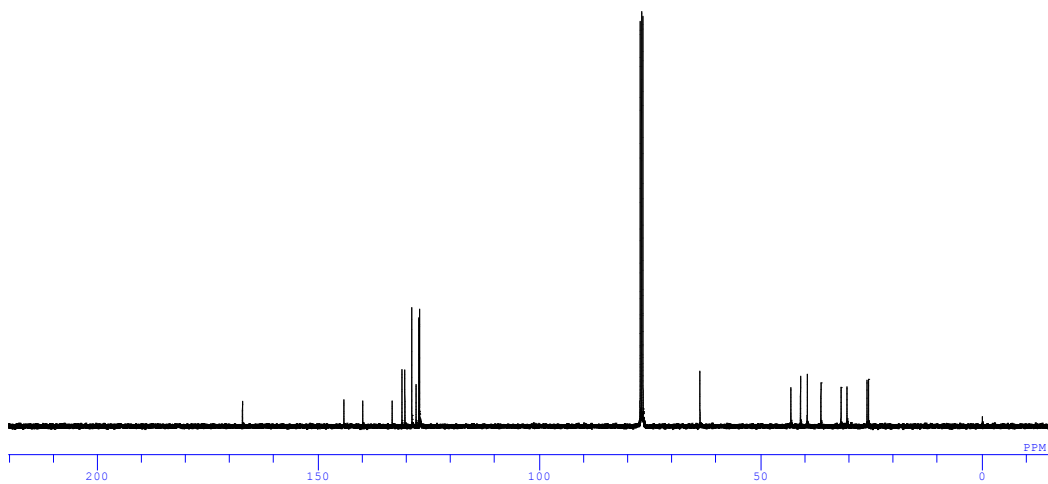

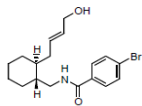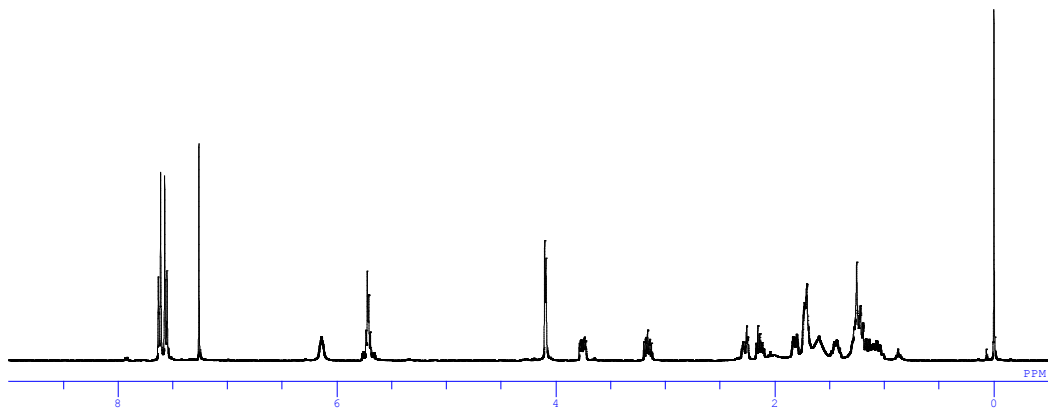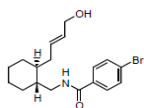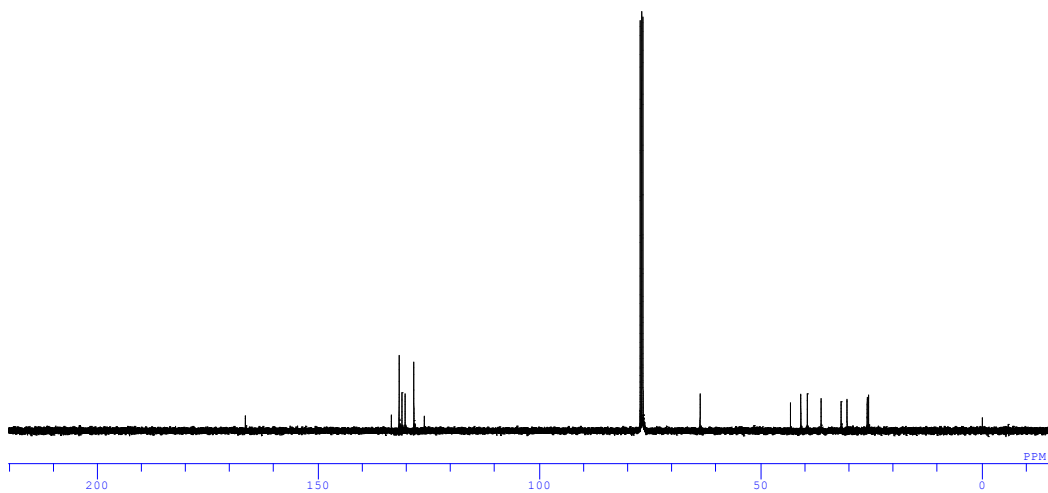

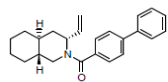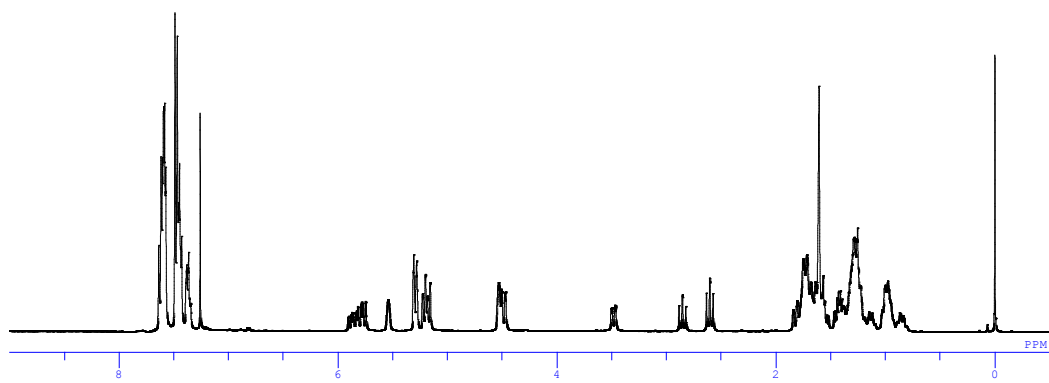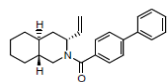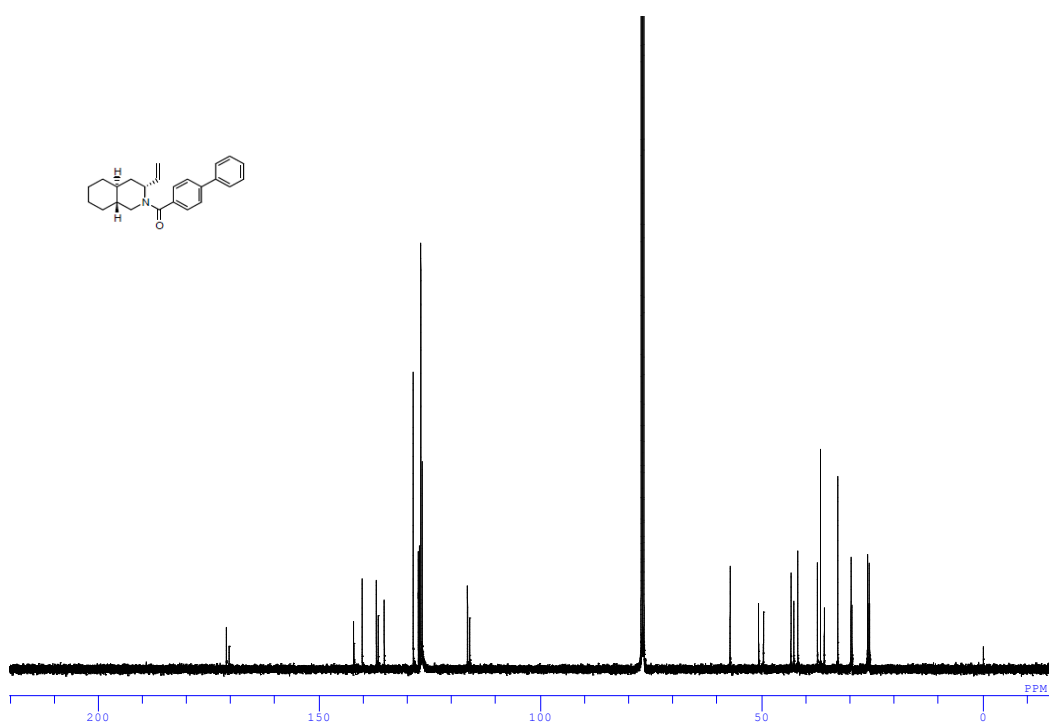

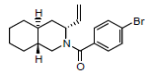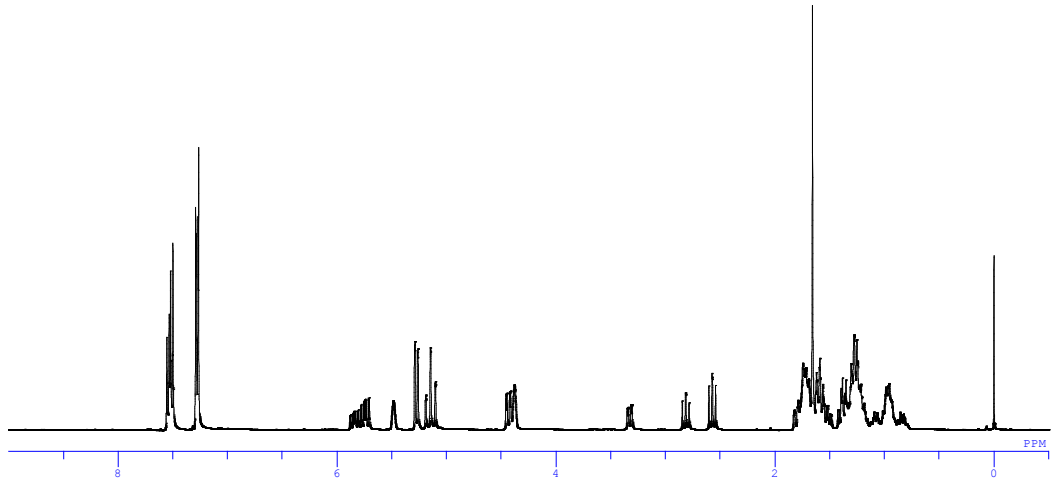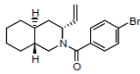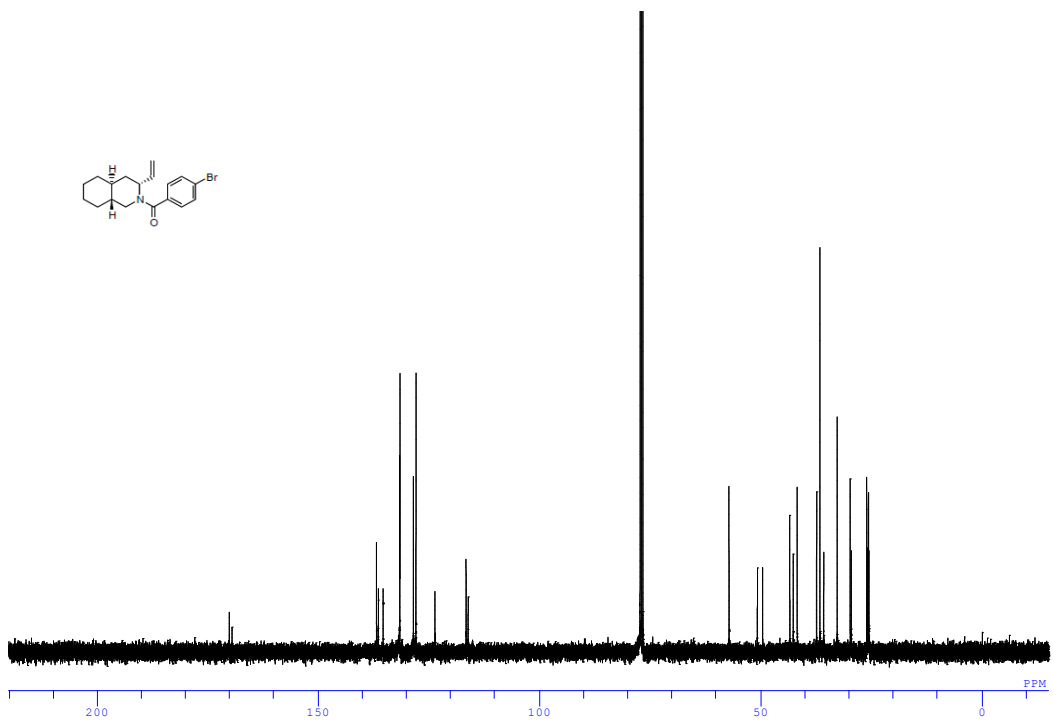

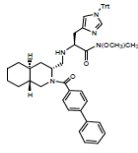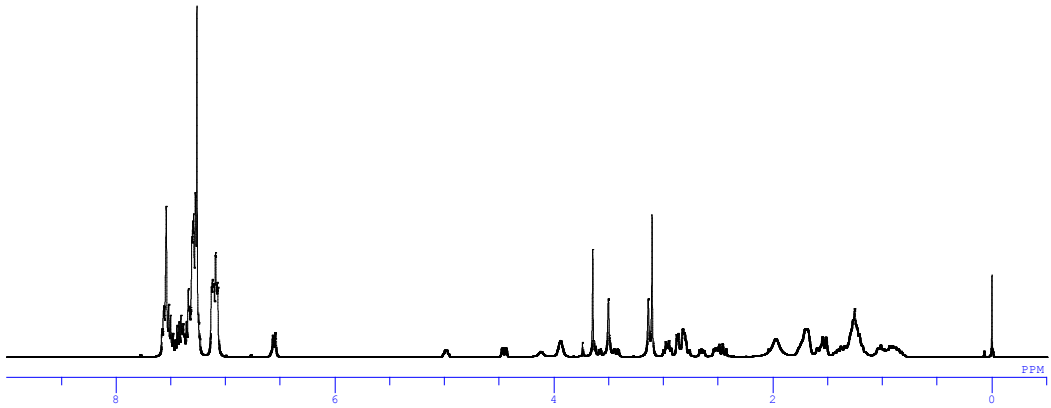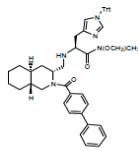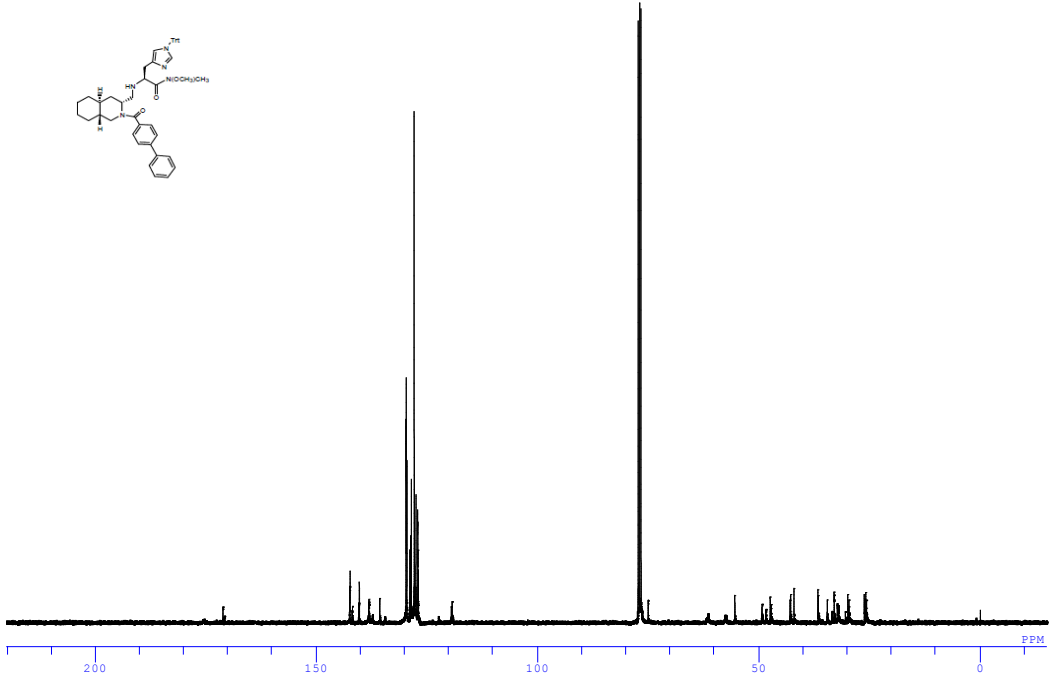

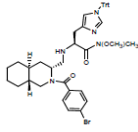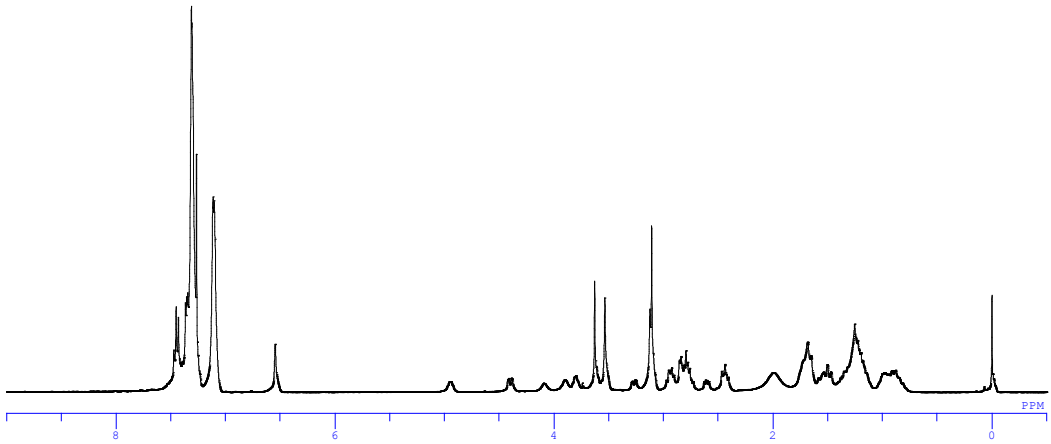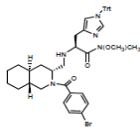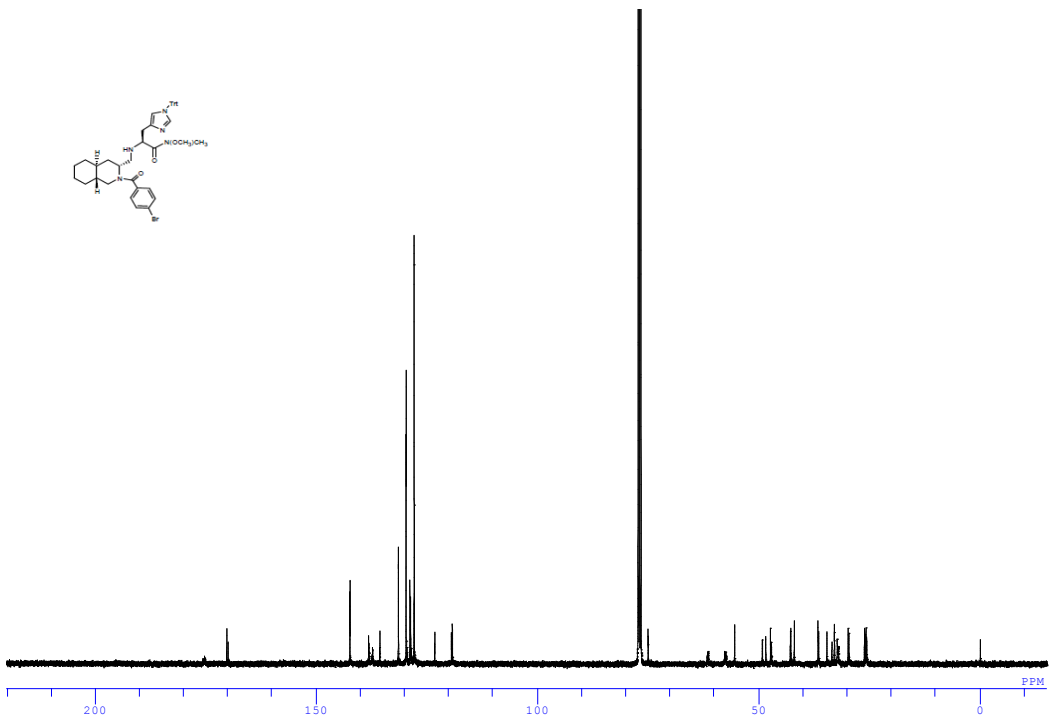

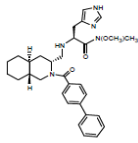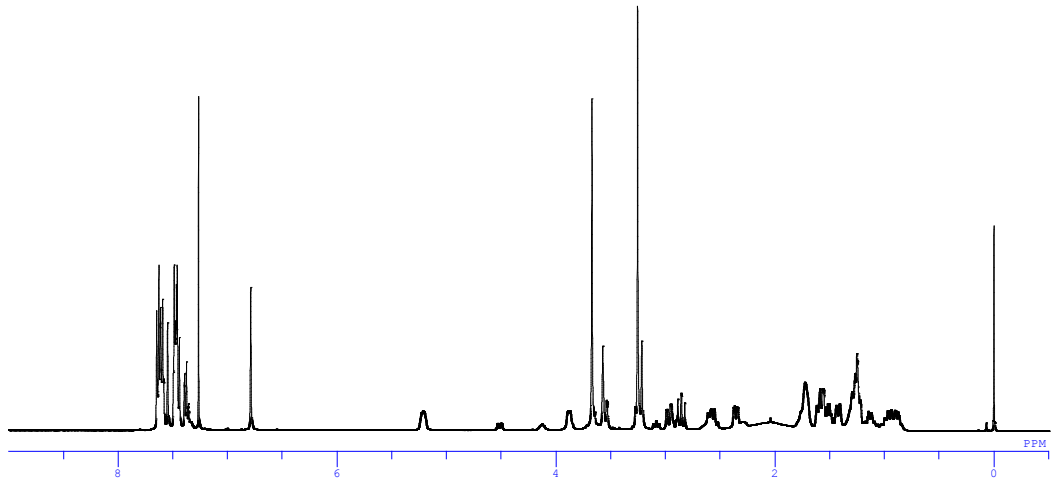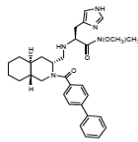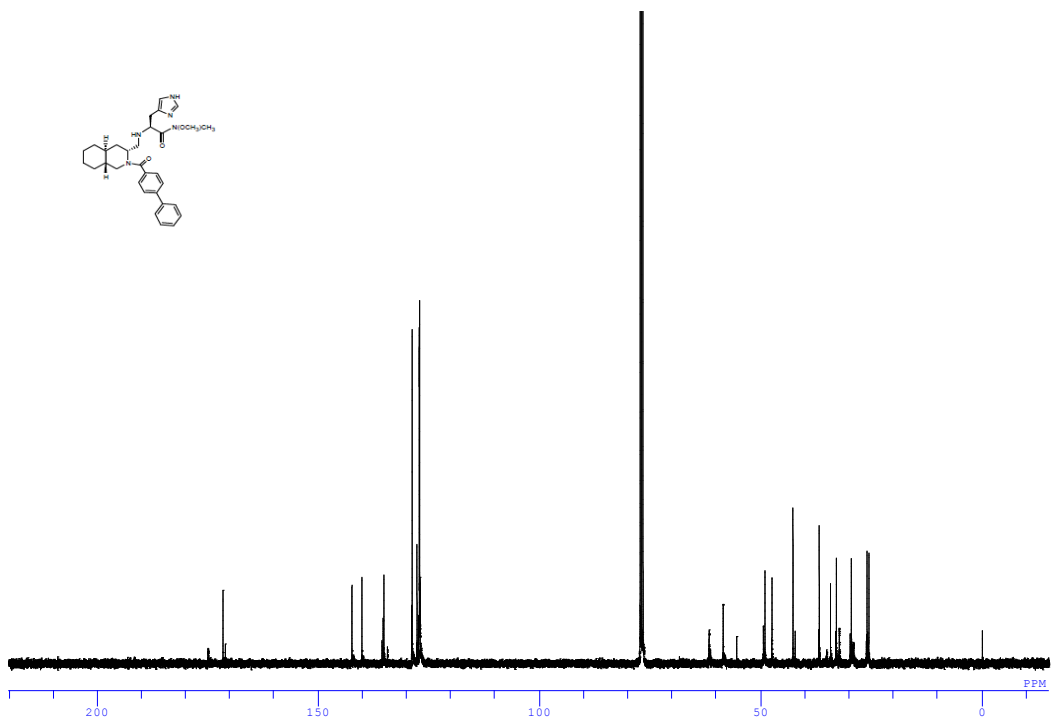



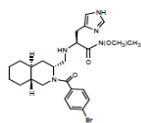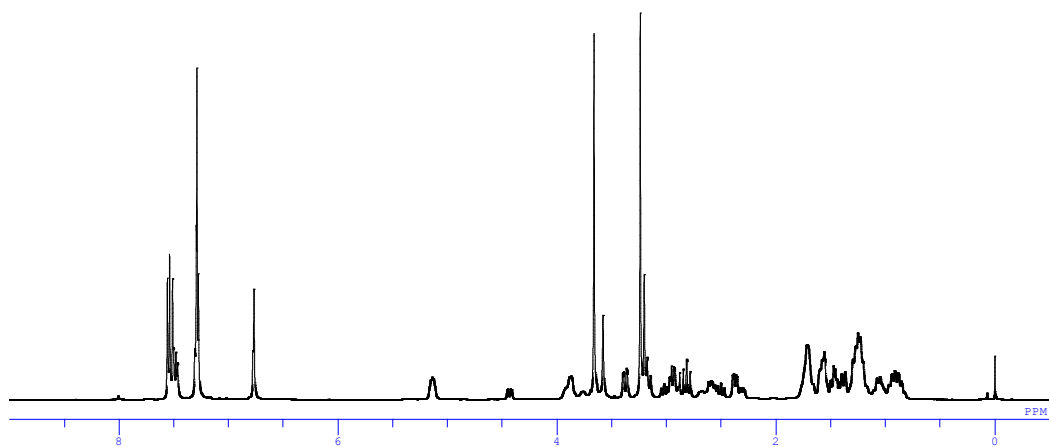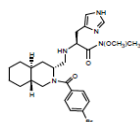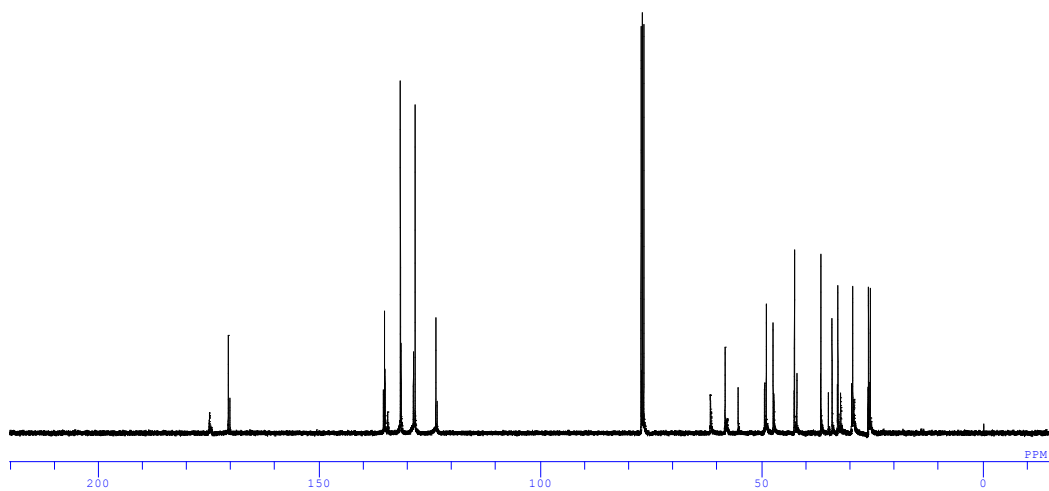

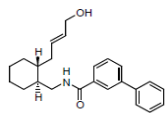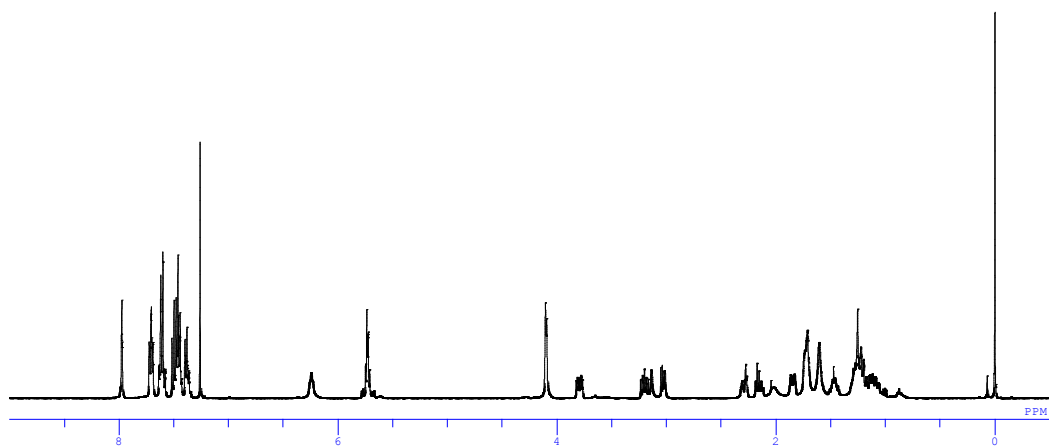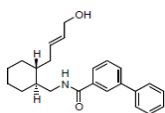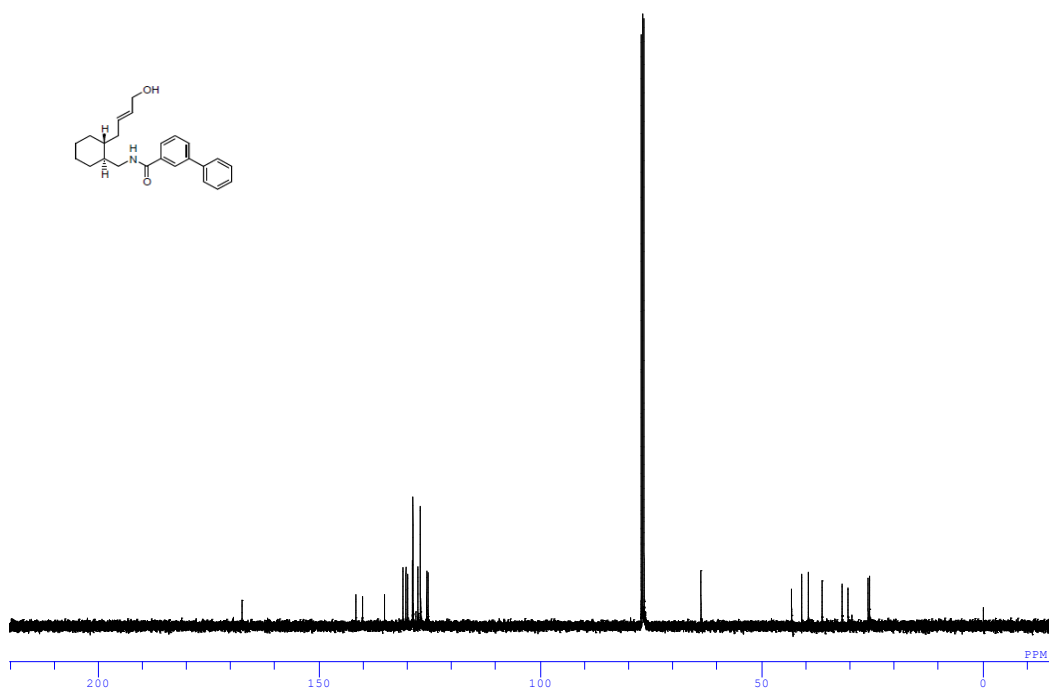

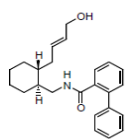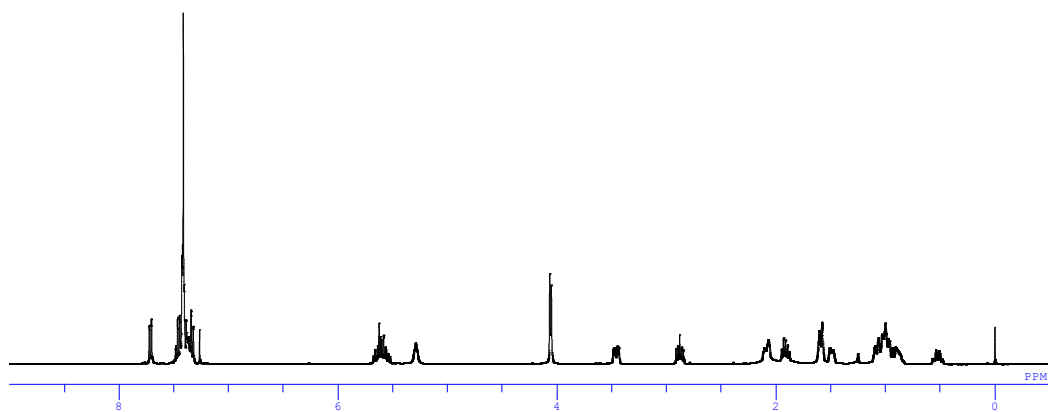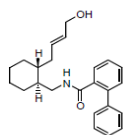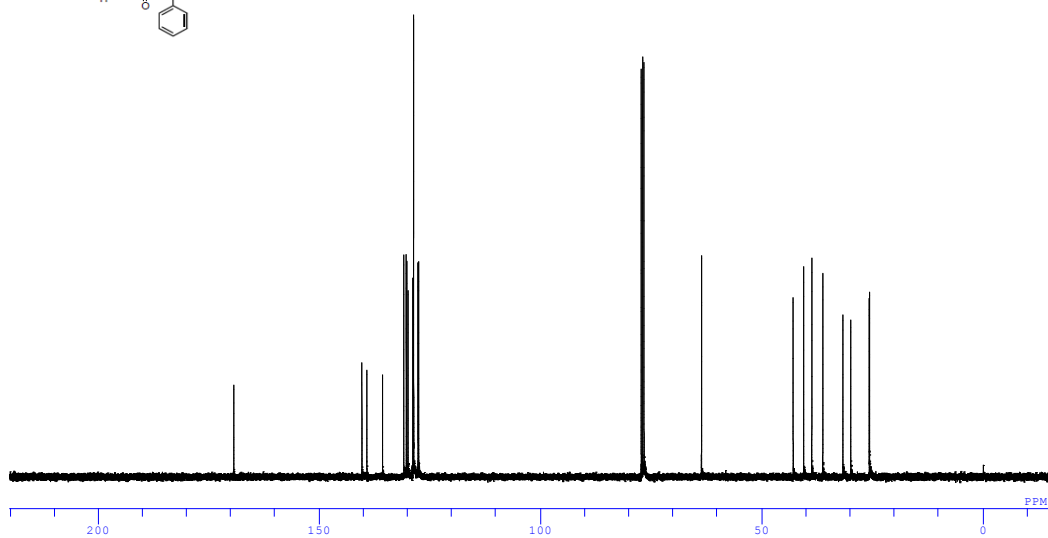

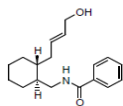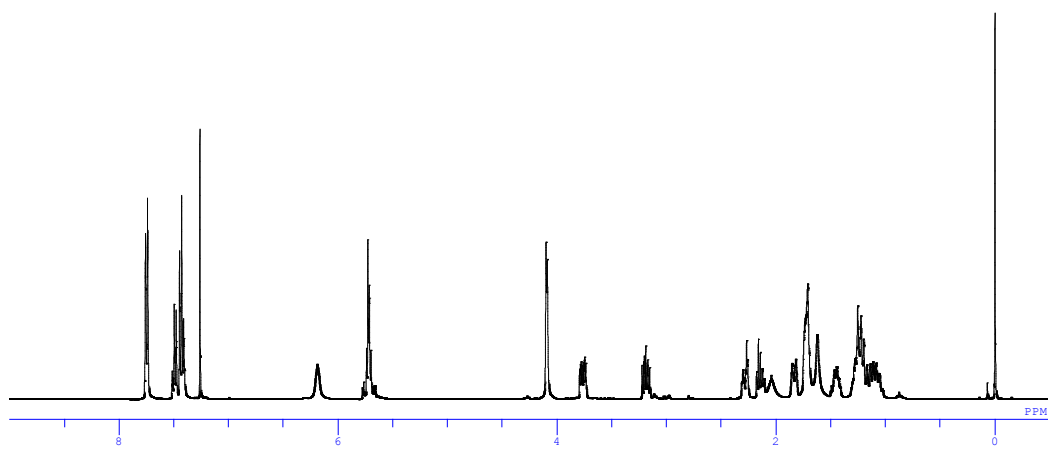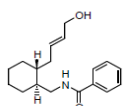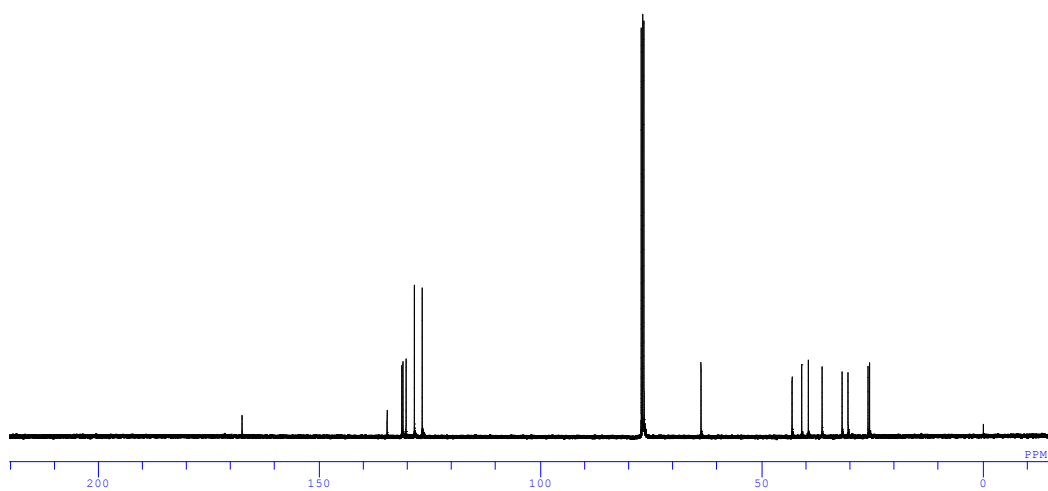

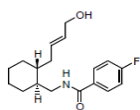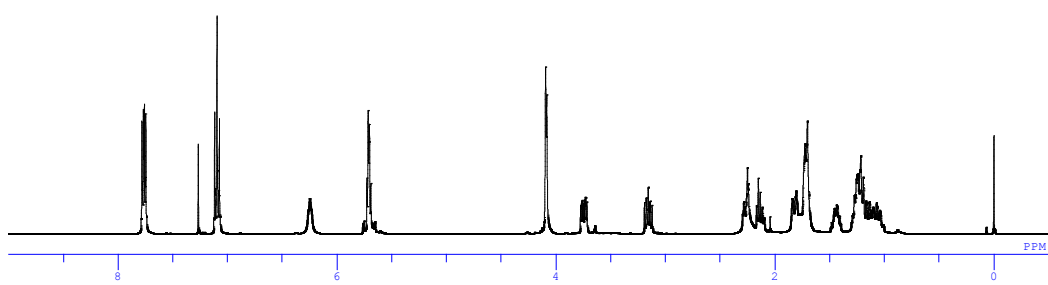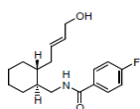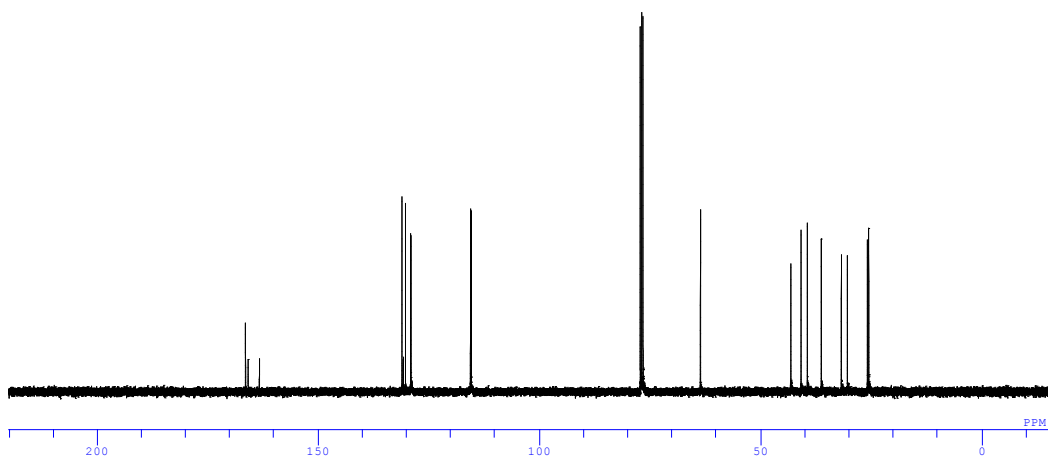

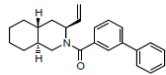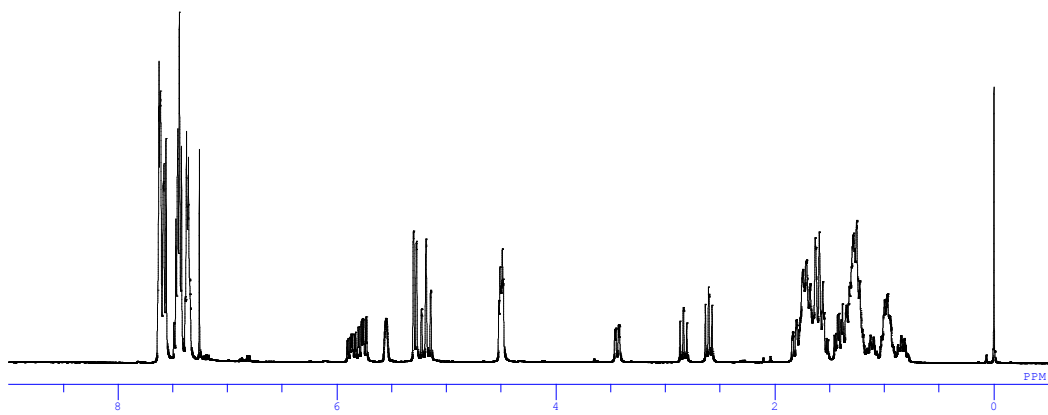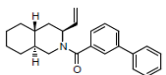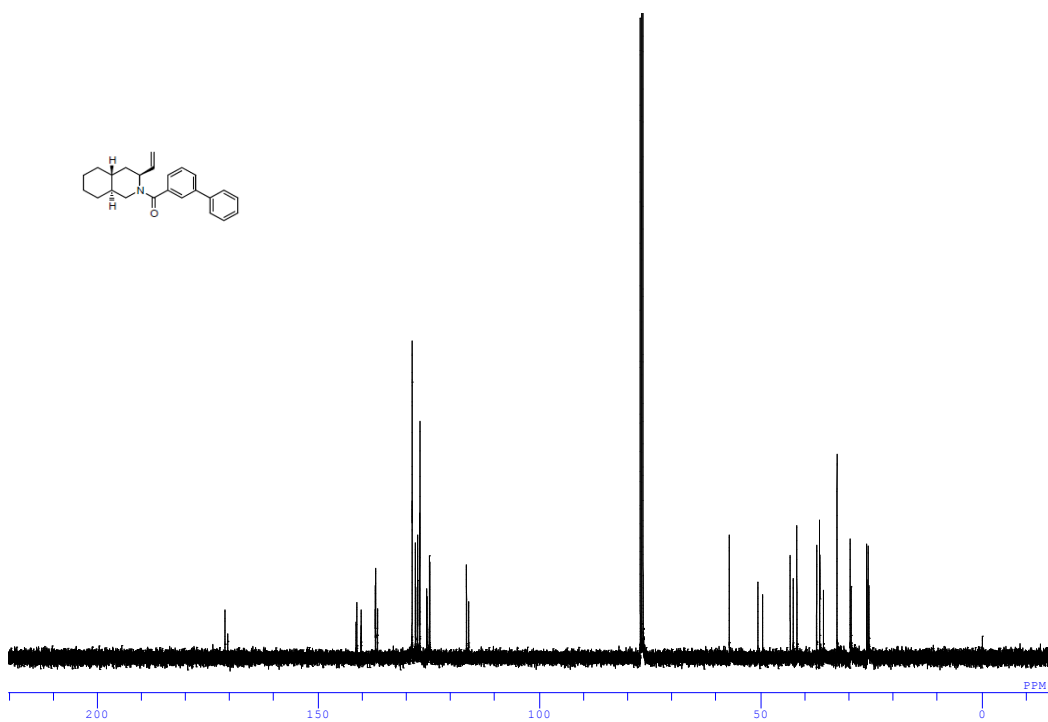

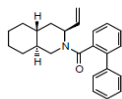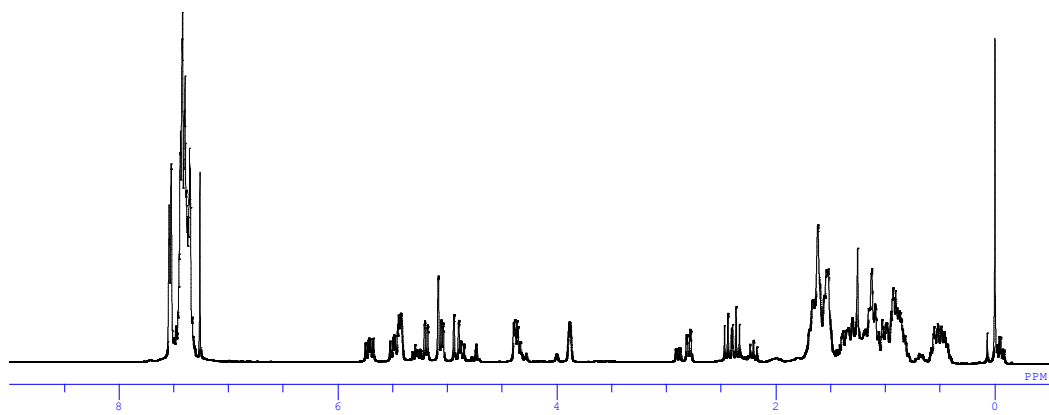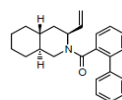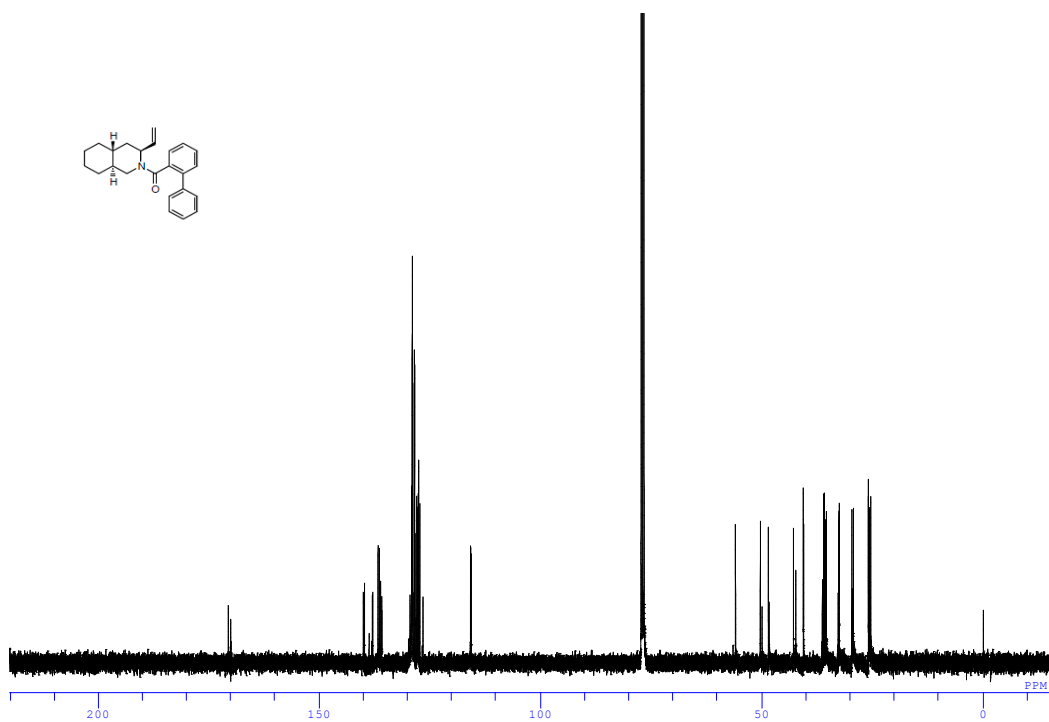

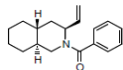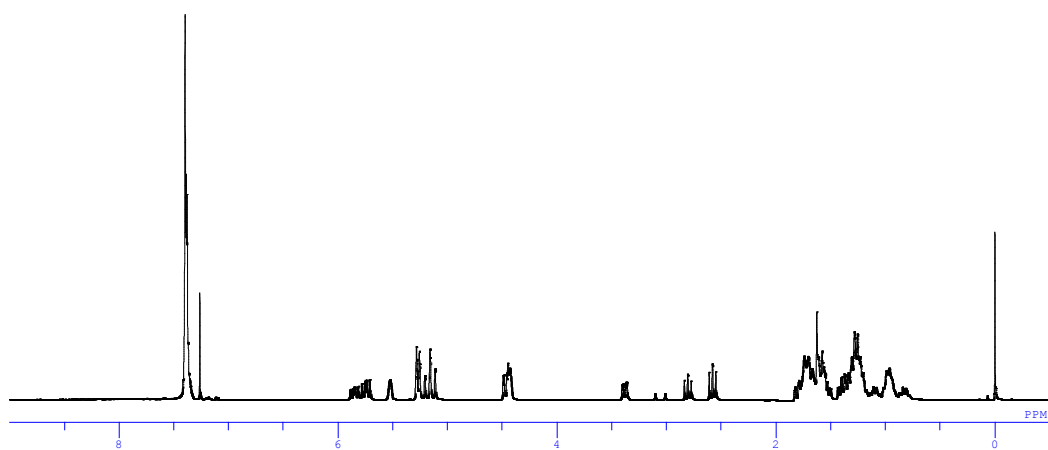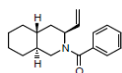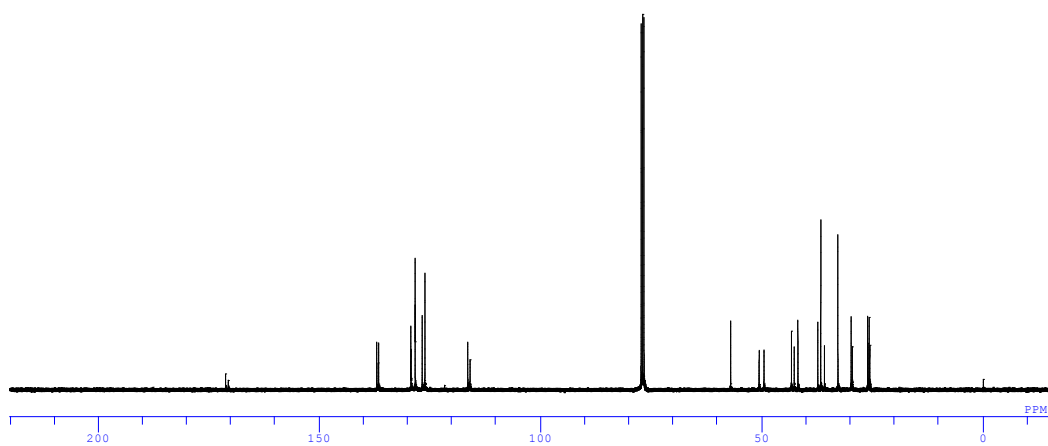



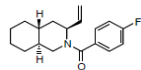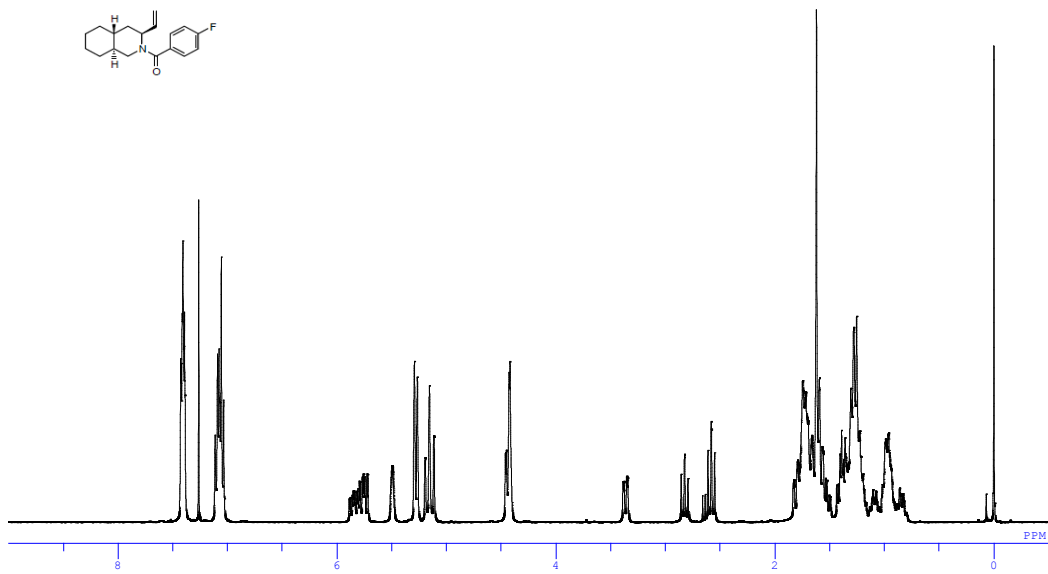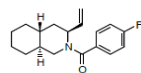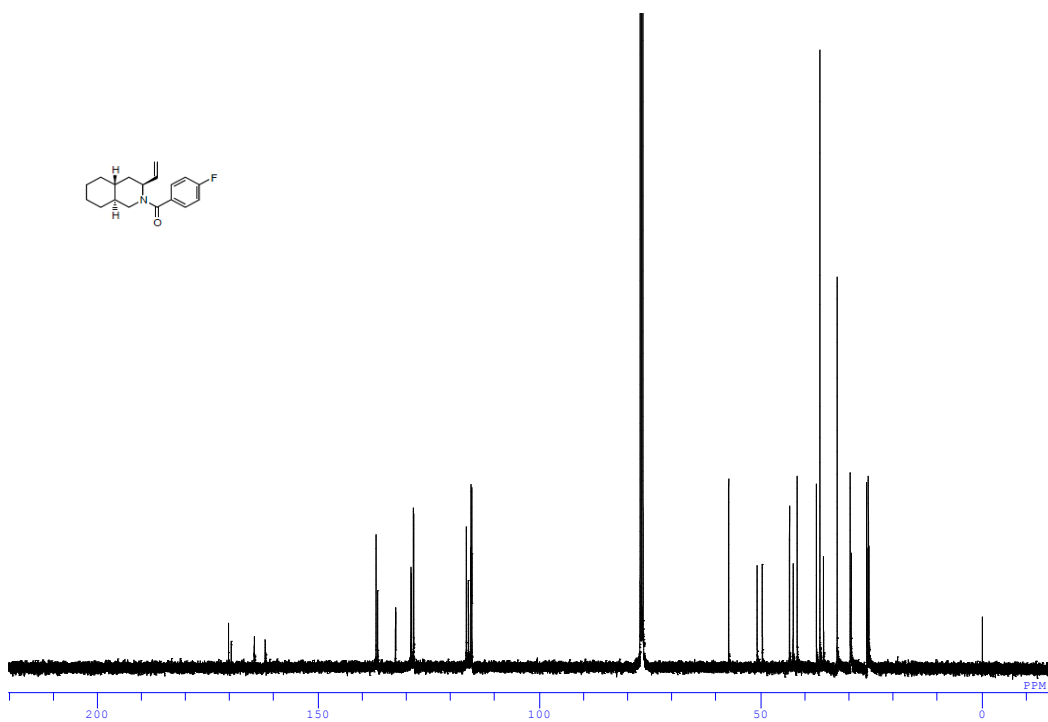

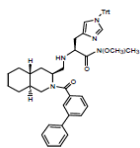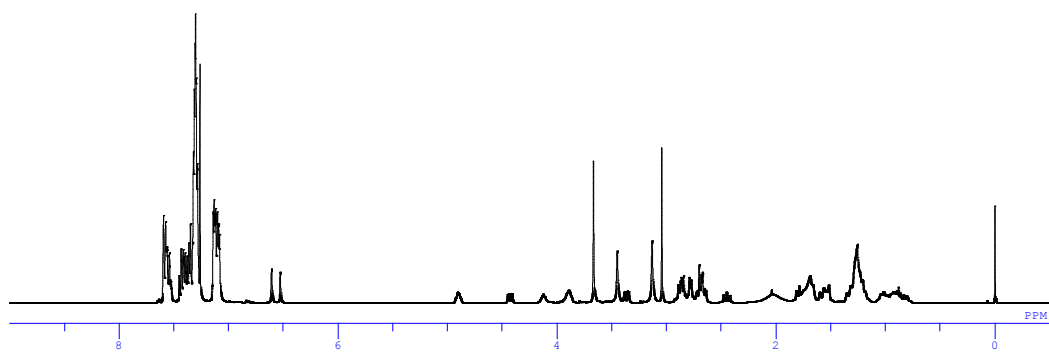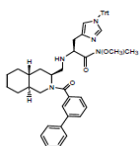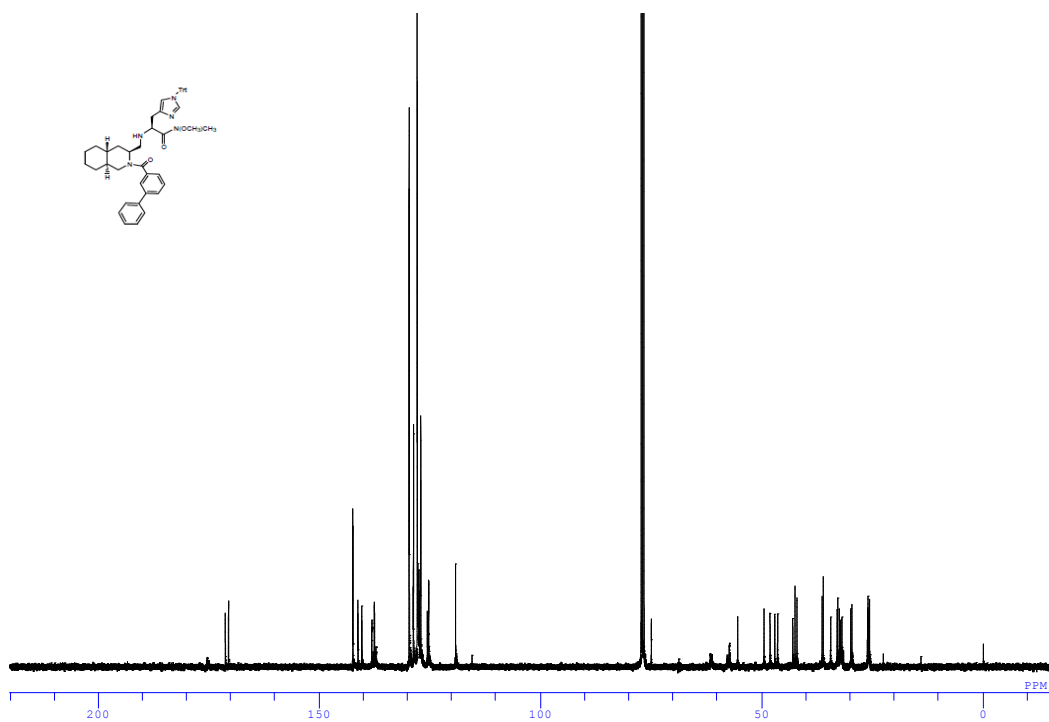

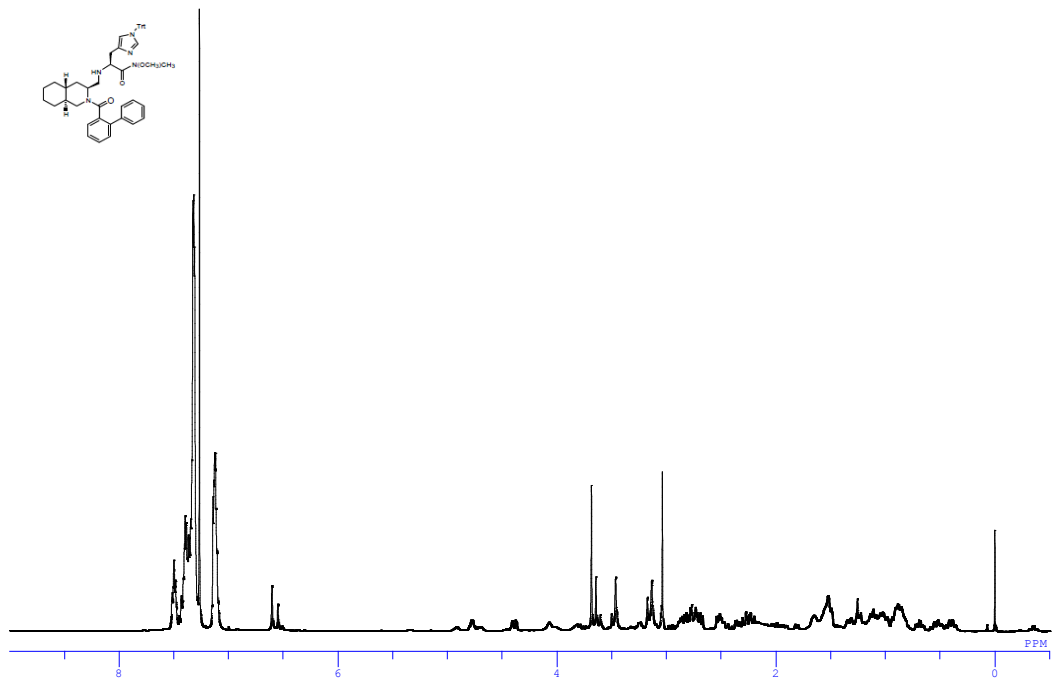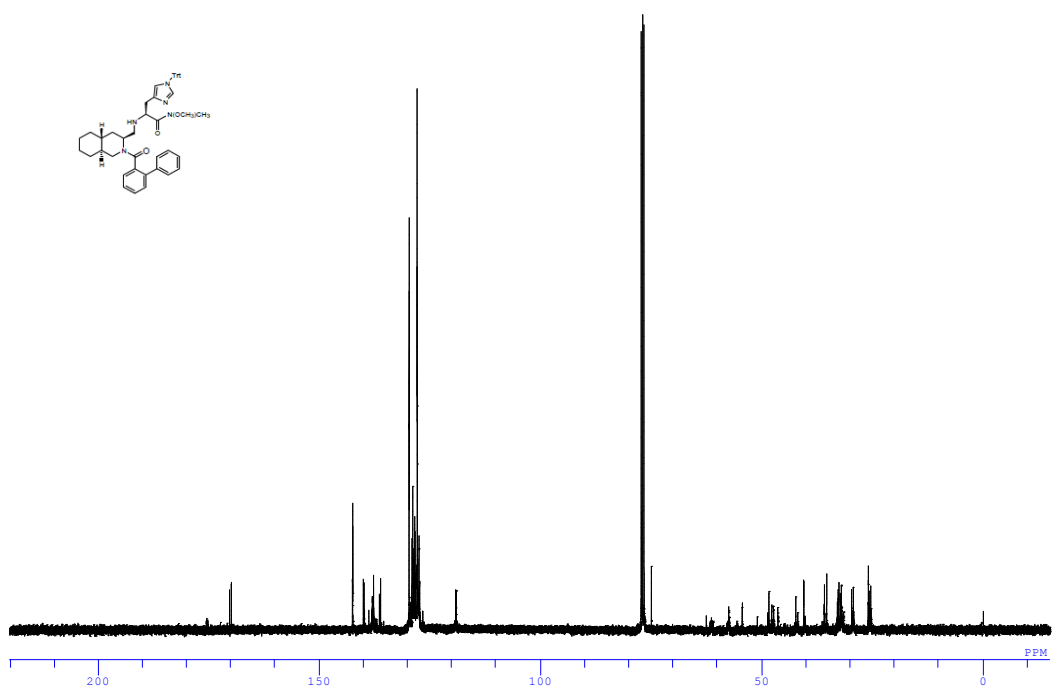

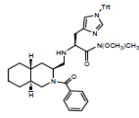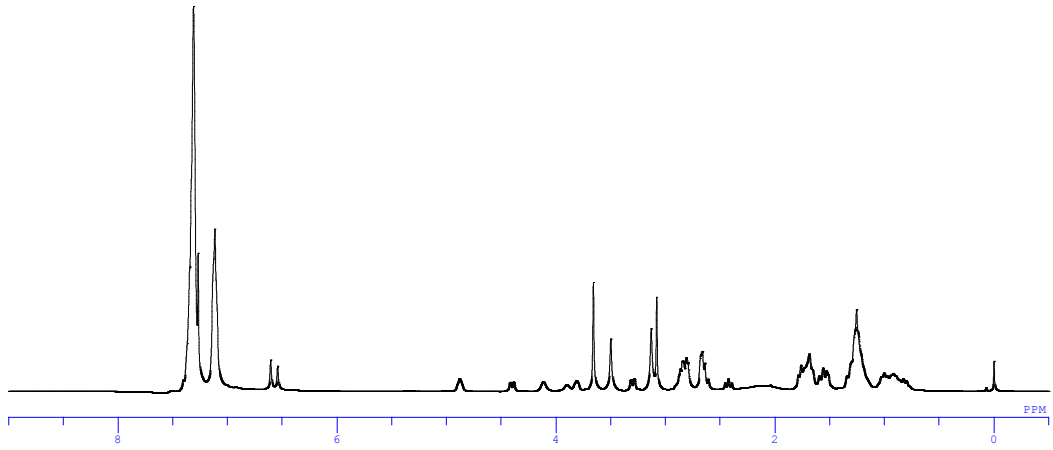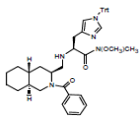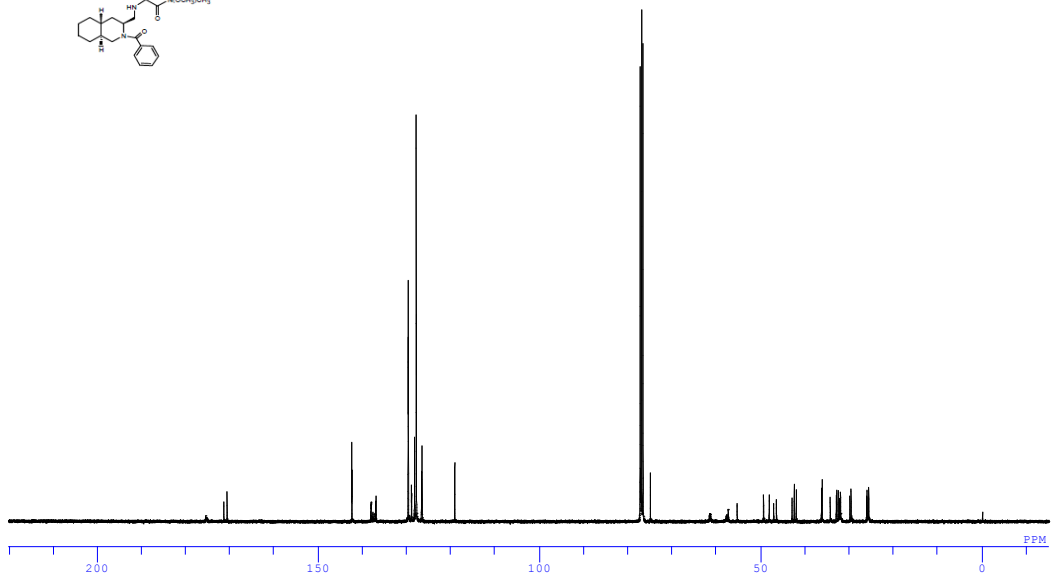

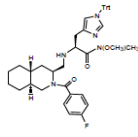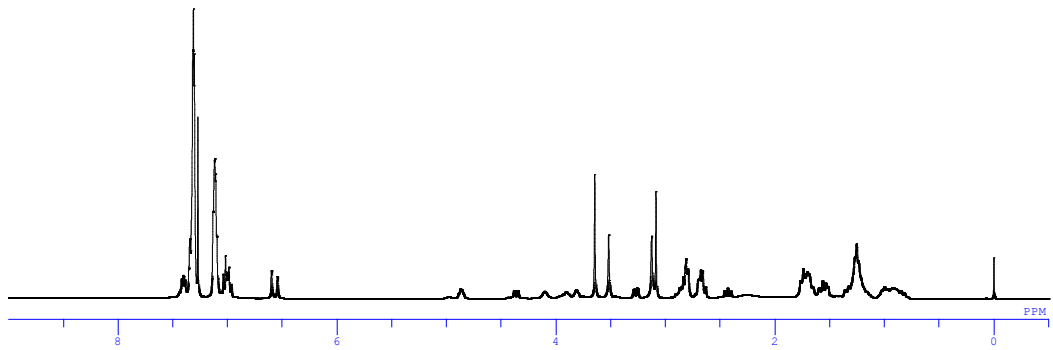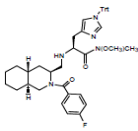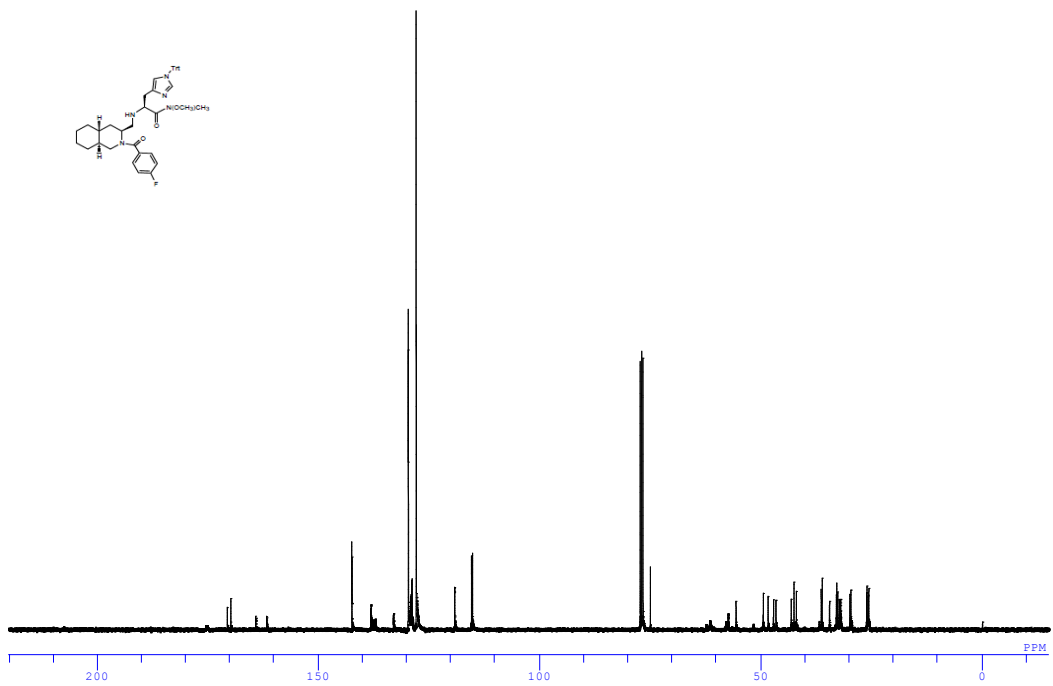

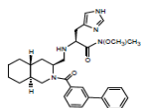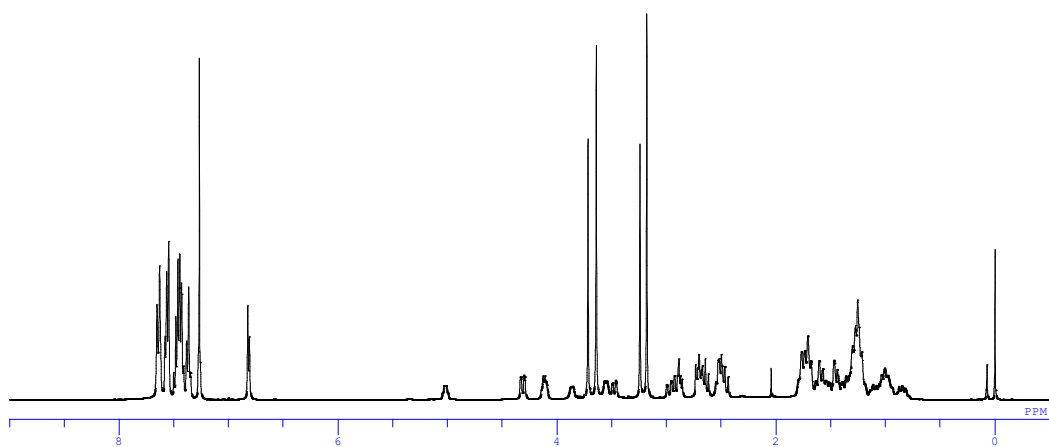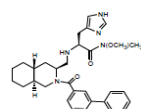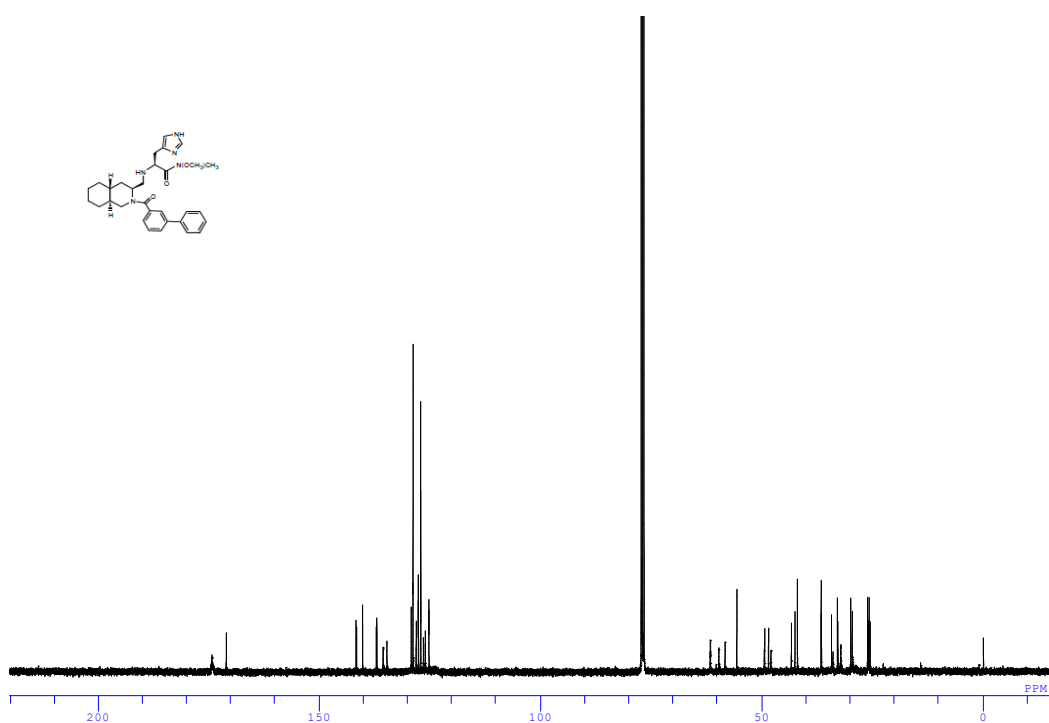

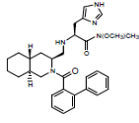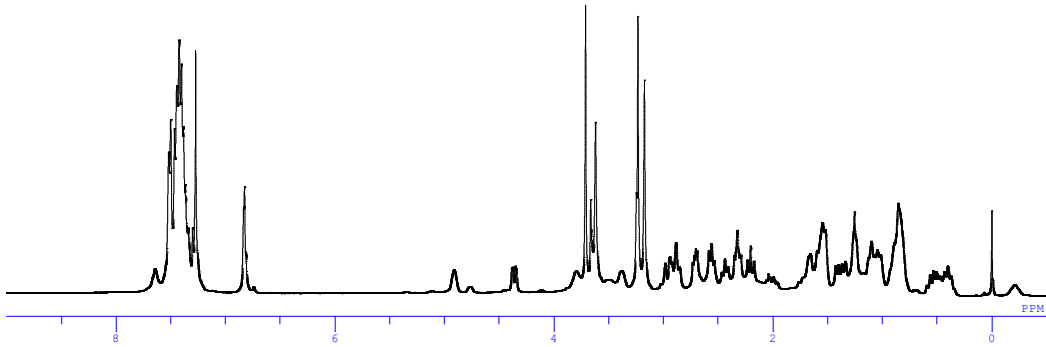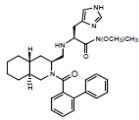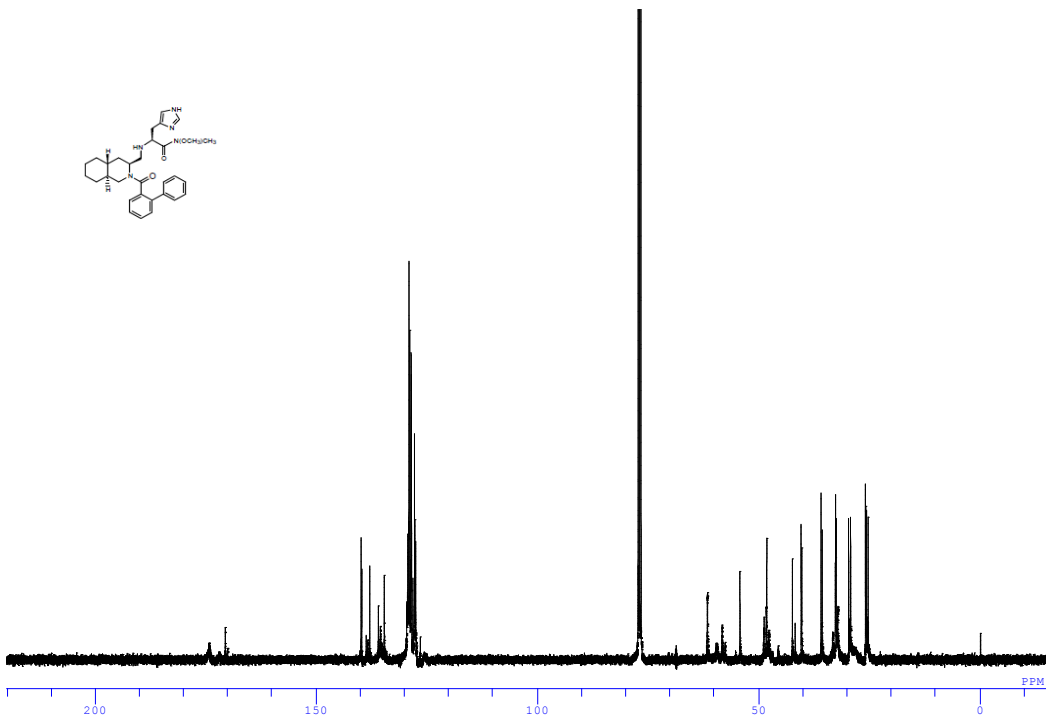

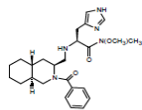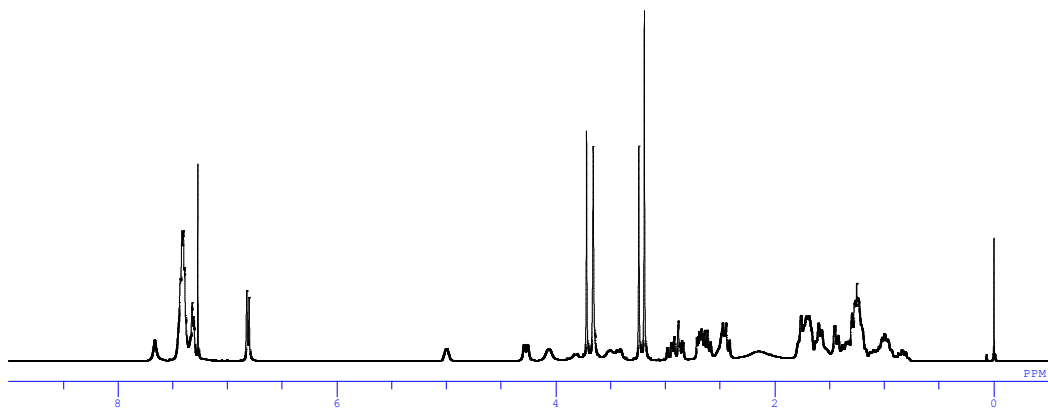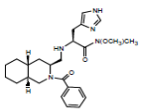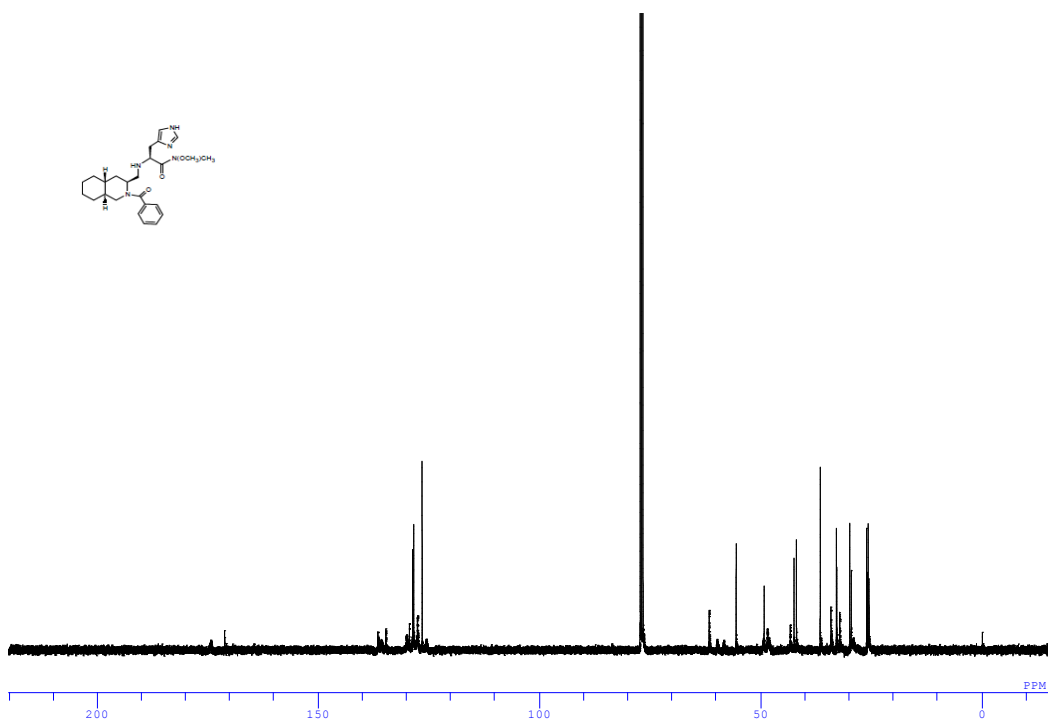



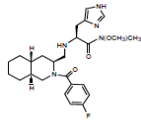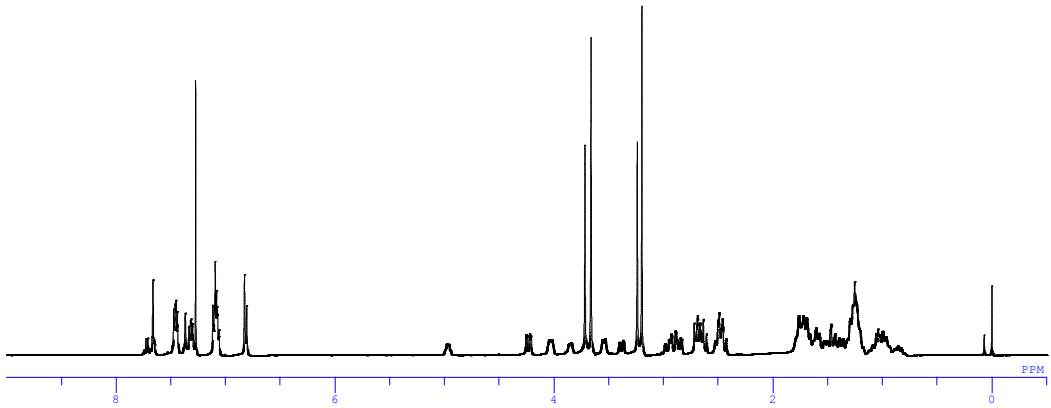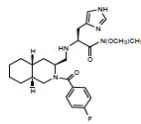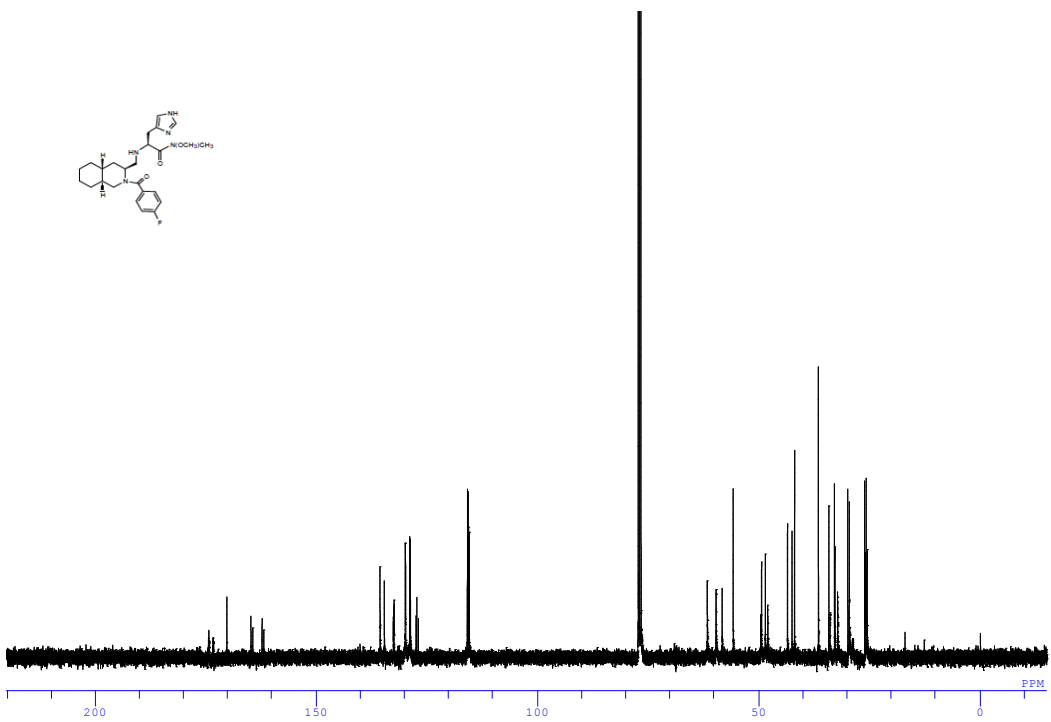

Supplement: mmc1.pdf [file mmc1.pdf]
